# Supplementary material for: Light-driven (cross-)dimerization of terpenes as a route to renewable C 15 –C 30 crudes for fuel and lubricant oil applications
Source: Royal Society of Chemistry journal article supplement (doi:10.1039/d2se01370c), 2023-01-01
Supplement: d2se01370c1.pdf [file d2se01370c1.pdf]

## Electronic Supporting Information (ESI†)

### **Light-driven (cross-)dimerization of terpenes as a route to renewable C<sub>15</sub> – C<sub>30</sub> crudes for fuel and lubricant oil applications**

Leandro Cid Gomes,<sup>a</sup> Anup Rana,<sup>a</sup> Mathias Berglund,<sup>b</sup> Per Wiklund<sup>c\*</sup> and Henrik Ottosson<sup>a\*</sup>

<sup>a</sup> Department of Chemistry – Ångström Laboratory, Uppsala University, Box 523, 751 20

Uppsala, Sweden.

<sup>b</sup> RISE Research Institutes of Sweden, Brinellgatan 4, Box 857, 501 15 Borås, Sweden.

<sup>c</sup> Biobase Sweden AB, Götlundagatan 3, 124 71 Bandhagen, Stockholm, Sweden.

Email: henrik.ottosson@kemi.uu.se, per@cfluids.eu

# Table of Contents

|                                                      |    |
|------------------------------------------------------|----|
| Screening of photosensitizers .....                  | 3  |
| Solar irradiance.....                                | 4  |
| Fuel and lubricant oil properties .....              | 5  |
| Reaction setups.....                                 | 7  |
| Screening of Photosensitizers .....                  | 8  |
| Spin density in the triplet state .....              | 9  |
| $\alpha$ -Terpinene dimerization.....                | 10 |
| $\alpha$ -Phellandrene dimerization.....             | 12 |
| Control experiments .....                            | 14 |
| Myrcene dimerization.....                            | 16 |
| Myrcene epoxide dimerization.....                    | 22 |
| Ocimene dimerization.....                            | 26 |
| Light intensity experiments.....                     | 29 |
| Cross-dimerization with $\alpha$ -phellandrene ..... | 32 |
| Myrcene and $\alpha$ -phellandrene .....             | 32 |
| Ocimene and $\alpha$ -phellandrene .....             | 41 |
| Ginger oil .....                                     | 44 |
| Cartesian coordinates .....                          | 47 |
| References.....                                      | 65 |

## Screening of photosensitizers

**Table S1** Screening of photosensitizers. Yields of myrcene dimers when 1,1-dinaphthylmethanone **8** is used compared to other photosensitizers.

| Photosensitizer           | $E_T$<br>(kcal mol <sup>-1</sup> ) <sup>a</sup> | Dimers yield<br>(wt%) <sup>b</sup> |
|---------------------------|-------------------------------------------------|------------------------------------|
| Benzophenone              | 64.5                                            | 18.4                               |
| 1,1-dinaphthylmethanone   | <b>55.5</b>                                     | <b>44.7</b>                        |
| Xanthone                  | 70.1                                            | 21.6                               |
| Thioxanthone <sup>c</sup> | 63.5                                            | 30.4                               |

<sup>a</sup> Adiabatic triplet energies calculated at B3LYP/6-311+G(d,p) level.<sup>S1, S2</sup>

<sup>b</sup> Yield of myrcene dimers after 48 h of irradiation, using 0.5 mol% of photosensitizer. Samples were irradiated in quartz test tubes under 365 nm light (Rayonet photoreactor).

<sup>c</sup> Photosensitizer with poor solubility, therefore, the amount added was not fully solubilized.

**Table S2** Optimization of photosensitizer **8** loading.

| Entry | <b>8</b><br>(mol%) | Dimers yield<br>(wt%) <sup>a</sup> |
|-------|--------------------|------------------------------------|
| 1     | 0.500              | <b>77.1</b>                        |
| 2     | 0.250              | <b>35.0</b>                        |
| 3     | 0.125              | <b>35.2</b>                        |
| 4     | 0.050              | <b>29.9</b>                        |
| 5     | 0.010              | <b>12.4</b>                        |

<sup>a</sup> Yields of  $\alpha$ -phellandrene dimers after 12 h of irradiation. Samples were irradiated in quartz test tubes under 365 nm light (Rayonet photoreactor).

## Solar irradiance

**Table S3** Global horizontal yearly average solar irradiance for Stockholm and other places located in lower latitudes. Data extracted from <https://energyplus.net/weather>

| <b>Location</b>                   | <b>Global horizontal yearly average solar irradiance MJ/m<sup>2</sup>/year</b> |
|-----------------------------------|--------------------------------------------------------------------------------|
| Accra, Ghana                      | 6,825                                                                          |
| Addis Ababa-Bole, Ethiopia        | 7,321                                                                          |
| Barcelona, Spain                  | 5,260                                                                          |
| Beijing, China                    | 5,025                                                                          |
| Berlin, Germany                   | 3,548                                                                          |
| Cairo, Egypt                      | 6,882                                                                          |
| Cape Town, South Africa           | 6,843                                                                          |
| Mexico City, Mexico               | 6,539                                                                          |
| Miami, United States of America   | 6,453                                                                          |
| Nairobi, Kenya                    | 6,701                                                                          |
| New Delhi, India                  | 7,054                                                                          |
| Paris, France                     | 3,845                                                                          |
| Phoenix, United States of America | 7,621                                                                          |
| Sao Paulo, Brazil                 | 5,515                                                                          |
| <b>Stockholm, Sweden</b>          | <b>3,319</b>                                                                   |
| Sydney, Australia                 | 5,948                                                                          |
| Tehran, Iran                      | 7,703                                                                          |

**Table S4** Monthly statistics of the global horizontal yearly average solar irradiance for Stockholm-Arlanda. Values in Wh/m<sup>2</sup>. Data extracted from <https://energyplus.net/weather>

| Jan | Feb | Mar  | Apr  | May  | Jun  | Jul  | Aug  | Sep  | Oct  | Nov | Dec |
|-----|-----|------|------|------|------|------|------|------|------|-----|-----|
| 260 | 764 | 1767 | 3743 | 5278 | 5360 | 5063 | 3810 | 2324 | 1178 | 447 | 200 |

## Fuel and lubricant oil properties

**Table S5** Computed heats of combustion.<sup>a</sup>

| Entry | Monomer                | Dimer      | Heat of combustion of hydrogenated dimer |                           |
|-------|------------------------|------------|------------------------------------------|---------------------------|
|       |                        |            | <b>kJ mol<sup>-1</sup></b>               | <b>MJ kg<sup>-1</sup></b> |
| 1     | $\alpha$ -Phellandrene | 1a         | 11,739.21                                | 42.46                     |
| 2     | $\alpha$ -Phellandrene | 1c         | 11,695.83                                | 42.30                     |
| 3     | Myrcene                | 2a (cis)   | 12,142.34                                | 43.29                     |
| 4     | Myrcene                | 2a (trans) | 12,151.44                                | 43.32                     |
| 5     | Myrcene                | 2g         | 12,066.60                                | 43.02                     |
| 6     | Myrcene                | 2k         | 12,115.98                                | 43.19                     |
| 7     | Ocimene                | 3h         | 12,089.65                                | 43.10                     |
| 8     | Ocimene                | 3k         | 12,125.64                                | 43.23                     |

<sup>a</sup> Calculated according to the procedure described in the reference S4, at M06-2X/6-31+G(d,p) level.<sup>S2-S4</sup> The Self-Consistent Reaction Field Solvent method (SCRF) was used to model the solvent toluene, using the Solvation Model Based on Density (SMD).

**Table S6** Fuel and lubricant oil properties measured for the hydrogenated dimers produced in this study.

| Physical Property                                 | HAPD                            | HMD                             | HAPID                                                              | HGOD                            |
|---------------------------------------------------|---------------------------------|---------------------------------|--------------------------------------------------------------------|---------------------------------|
| Molecular formula                                 | C <sub>20</sub> H <sub>36</sub> | C <sub>20</sub> H <sub>40</sub> | C <sub>20</sub> H <sub>36</sub><br>C <sub>15</sub> H <sub>28</sub> | C <sub>30</sub> H <sub>56</sub> |
| Hydrogen content, % mass                          | 13.12                           | 14.37                           | 13.74                                                              | 10.85                           |
| Gravimetric Net Heat of Combustion (NHOC), MJ/kg  | 43.09                           | 43.74                           | 43.30                                                              | -                               |
| Density at 25 °C, g/mL                            | 0.9314                          | 0.8606                          | 0.9042                                                             | -                               |
| Volumetric NHOC, MJ/L at 25 °C                    | 40.13                           | 37.65                           | 39.15                                                              | -                               |
| Kinematic viscosity at -20 °C, mm <sup>2</sup> /s | > 10 <sup>4</sup>               | 475.4                           | 209.7                                                              | -                               |
| Kinematic viscosity at 40 °C, mm <sup>2</sup> /s  | 41.1                            | 12.7                            | 6.45                                                               | 303                             |
| Kinematic viscosity at 100 °C, mm <sup>2</sup> /s | 4.16                            | 2.89                            | -                                                                  | 14.7                            |
| Viscosity Index                                   | -                               | 59                              | -                                                                  | -                               |
| Pour point, °C                                    | -21                             | < -45                           | < -45                                                              | -15                             |

## Reaction setups

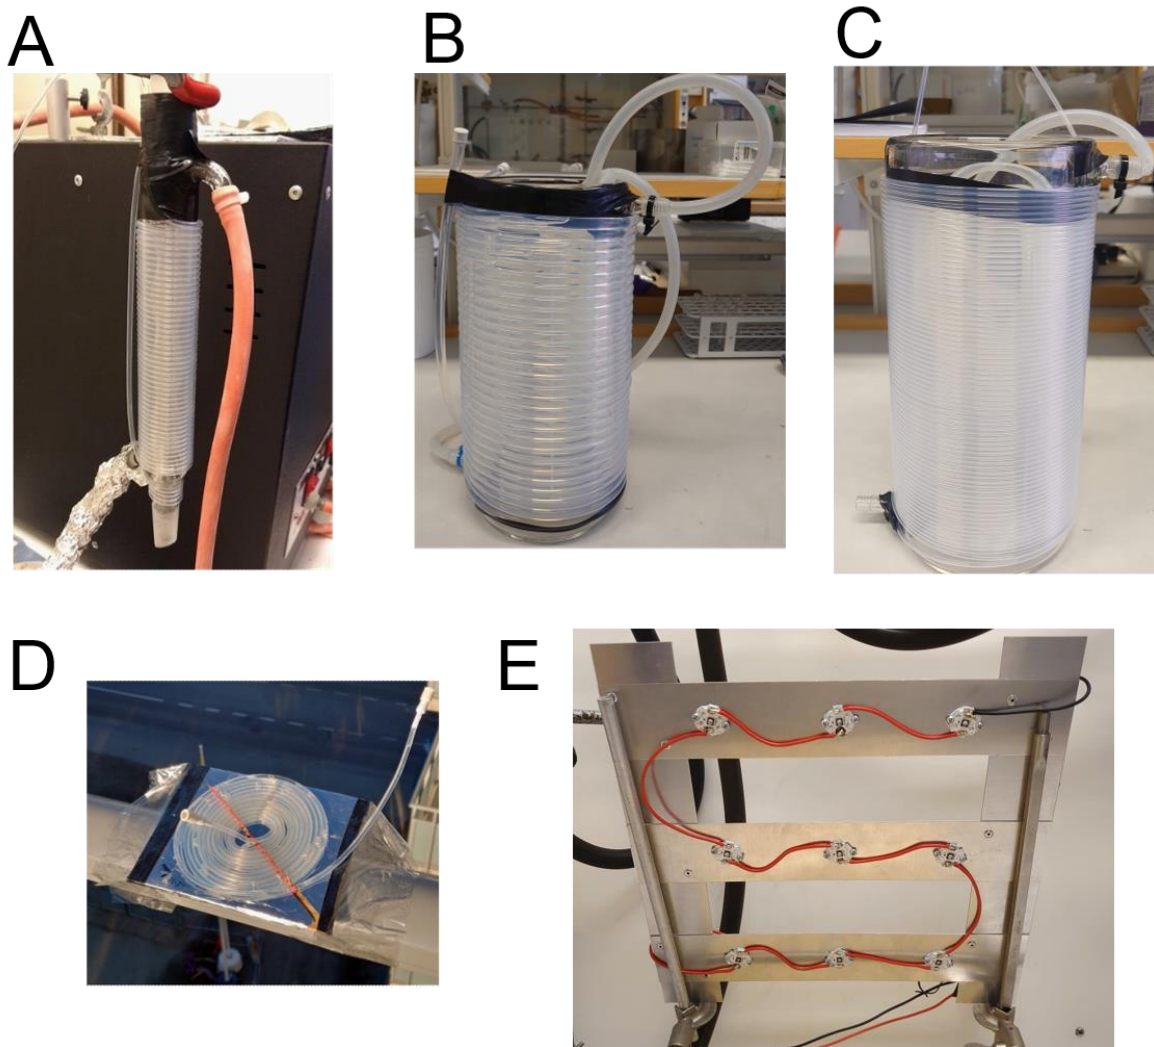

**Fig. S1** Custom-made setup (CMS) with FEP tubing used in the photoreactions. **A)** CMS I, FEP tubing dimensions: O.D.  $\times$  I.D. : 3.18 mm  $\times$  2.1 mm - loop volume = 20 mL. **B)** CMS II, FEP tubing dimensions: O.D.  $\times$  I.D. : 7.94 mm  $\times$  6.35 mm - loop volume = 400 mL. **C)** CMS III, FEP tubing dimensions: O.D.  $\times$  I.D. : 3.18 mm  $\times$  2.1 mm - loop volume = 120 mL **D)** CMS IV, flat spiral FEP tubing setup used in experiments with simulated and natural sunlight. FEP tubing dimensions: O.D.  $\times$  I.D. : 3.18 mm  $\times$  2.1 mm - loop volume = 10 mL. **E)** A custom-made 30 cm  $\times$  30 cm LED panel with light intensity control used in the light intensity experiments. The panel has nine 365 nm LED lamps equally spaced from each other (LZ1-10UV0R, OSRAM Opto Semiconductors Inc.).

## Screening of Photosensitizers

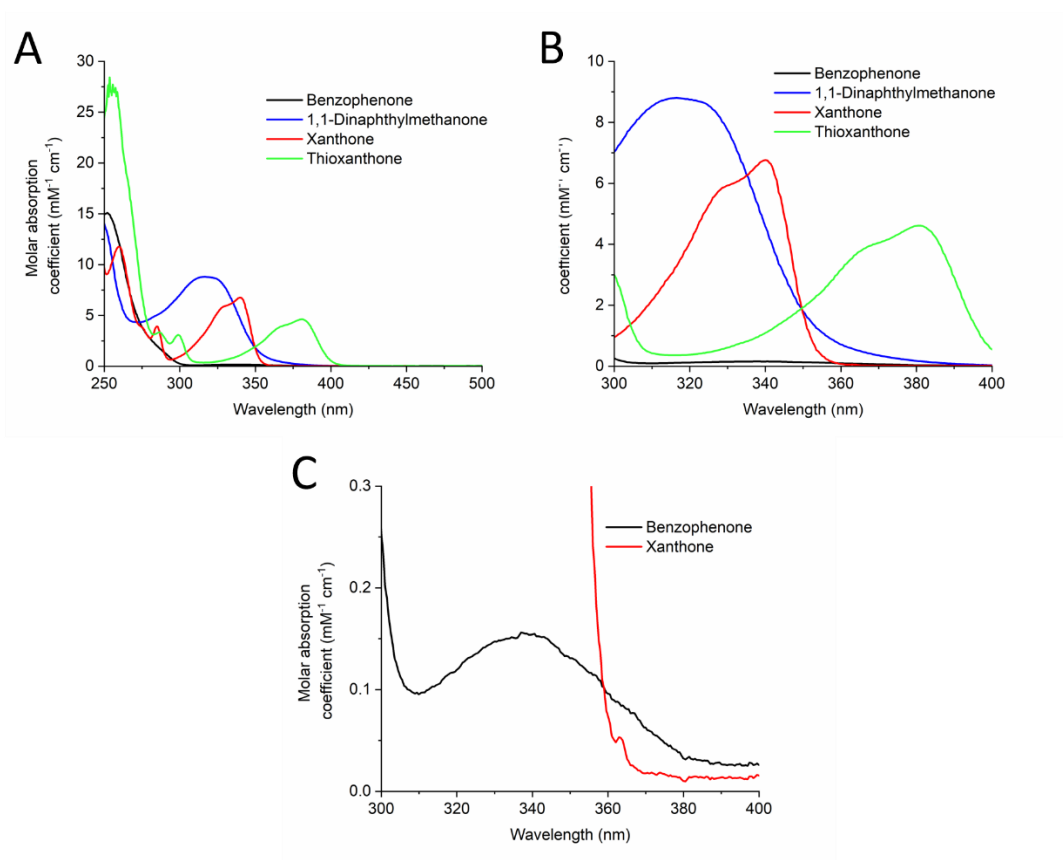

**Fig. S2** A) UV-Vis absorption spectra of the photosensitizers tested. Solvent: cyclohexane. B) Near-UV region zoomed in. C) Zoomed in region showing the absorption of benzophenone and xanthone at 365 nm.



## Spin density in the triplet state

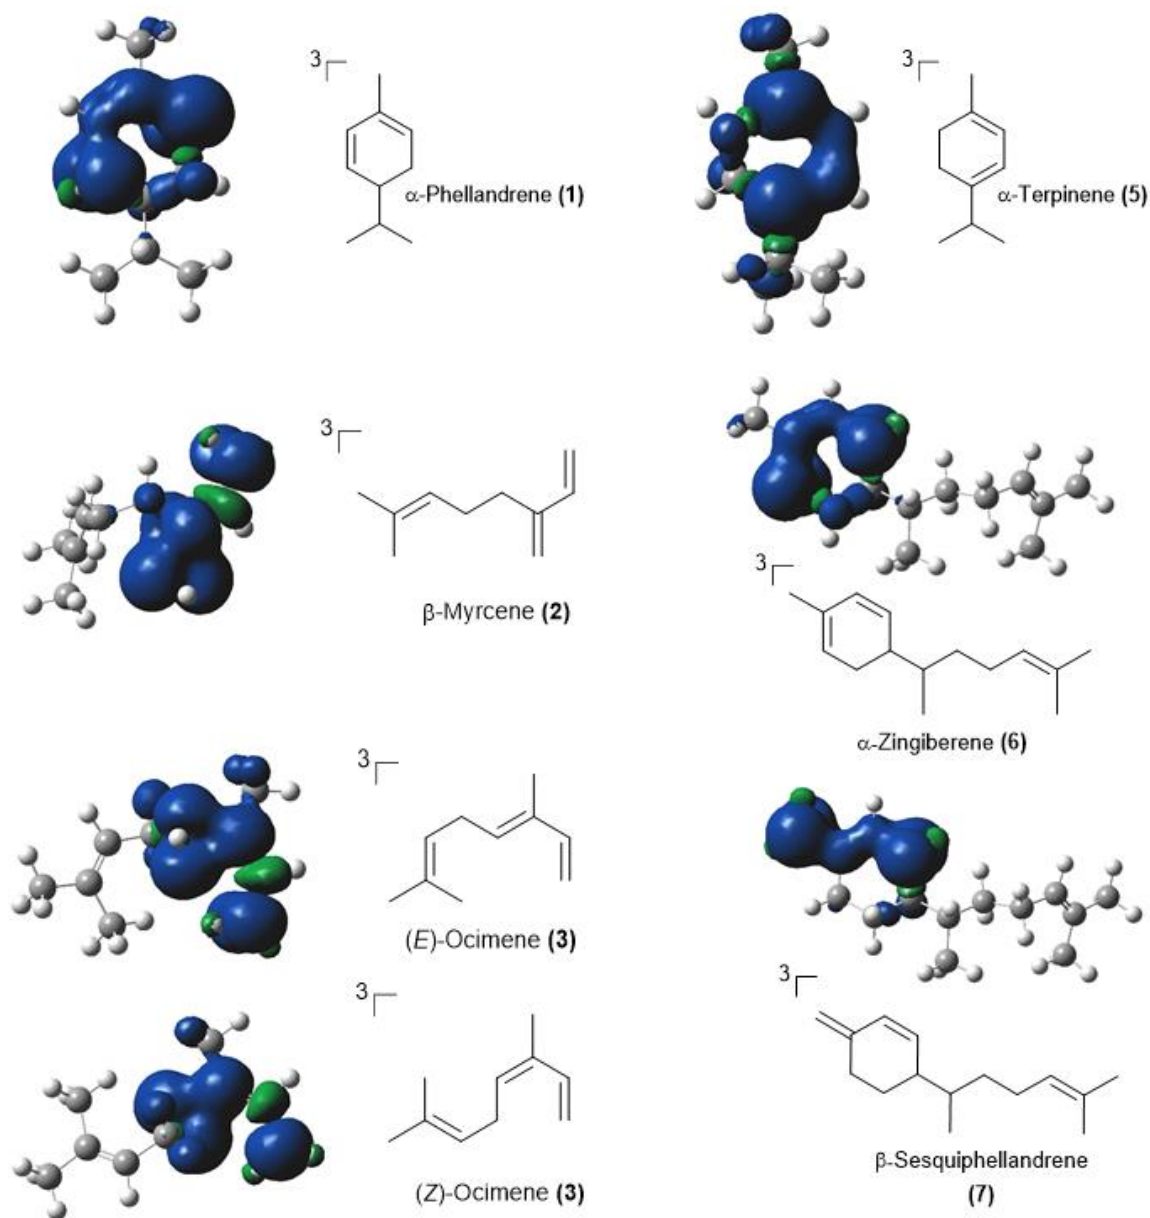

**Fig. S3** Spin densities in the first triplet ( $T_1$ ) state of the terpenes studied. Geometries and energies calculated at the (U)M06-2X/6-311+G(d,p) level.<sup>S2, S3</sup> The diene structures of **2** and **3** show twisted geometries with the allyl segment at the termini of the hydrocarbon chain. The other compounds (endocyclic dienes) do not have twisted structures in their  $T_1$  states.

## $\alpha$ -Terpinene dimerization

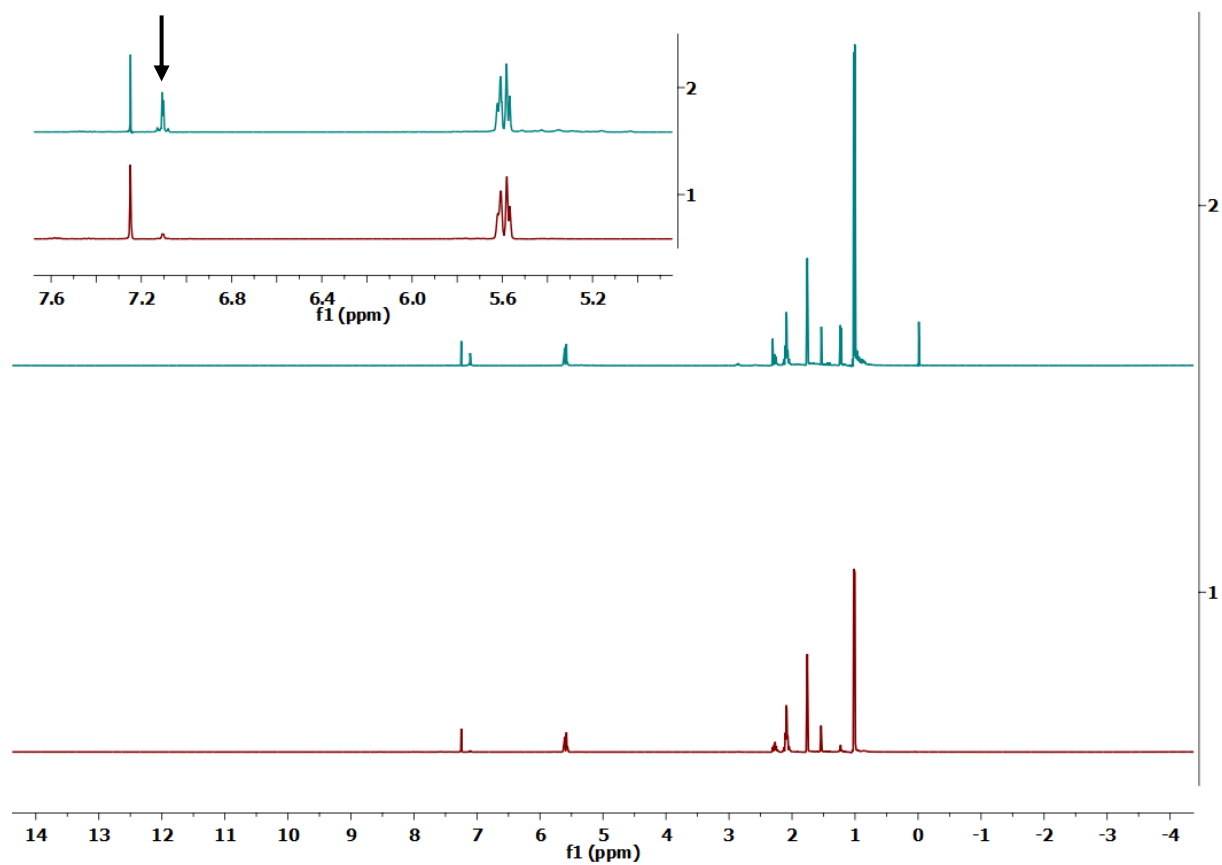

**Fig. S4** <sup>1</sup>H NMR spectra of crude sample of  $\alpha$ -terpinene **5** irradiated with **8** for 48 h (**top**) and starting material (**bottom**). The inset highlights the increase of aromatic content due to aromatization of **5** and photoreduction of **8**. The arrow indicates the aromatic product from the dehydrogenation of **5**.

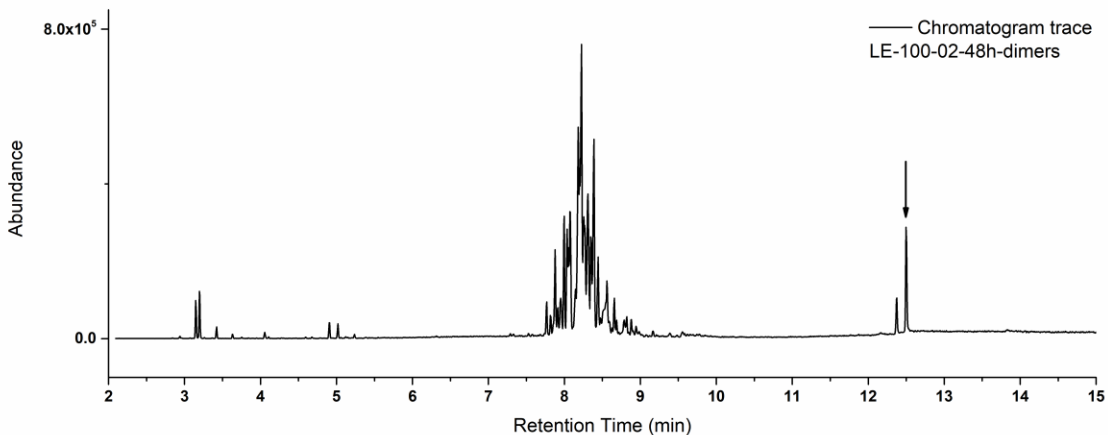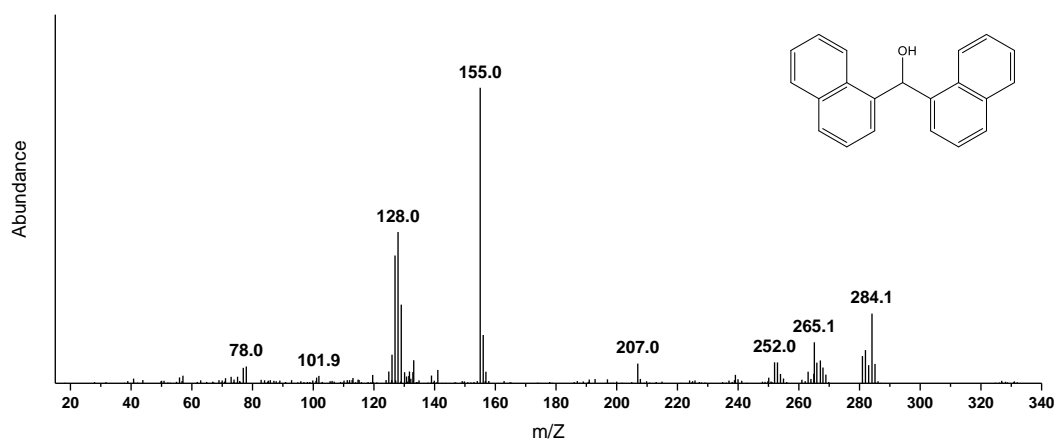

**Fig. S5** Chromatogram trace of distilled sample of  $\alpha$ -terpinine **5** irradiated with **8** for 48 h (**top**). Some C10 starting material was still present in the sample. The arrow indicates the peak of the reduced 1,1-dinaphthylmethanone **8** due to abstraction of H-atoms from **5**. The mass spectrum for that peak is also displayed (**bottom**), where it can be found the  $M^+ = 284.1$  m/z.

## $\alpha$ -Phellandrene dimerization

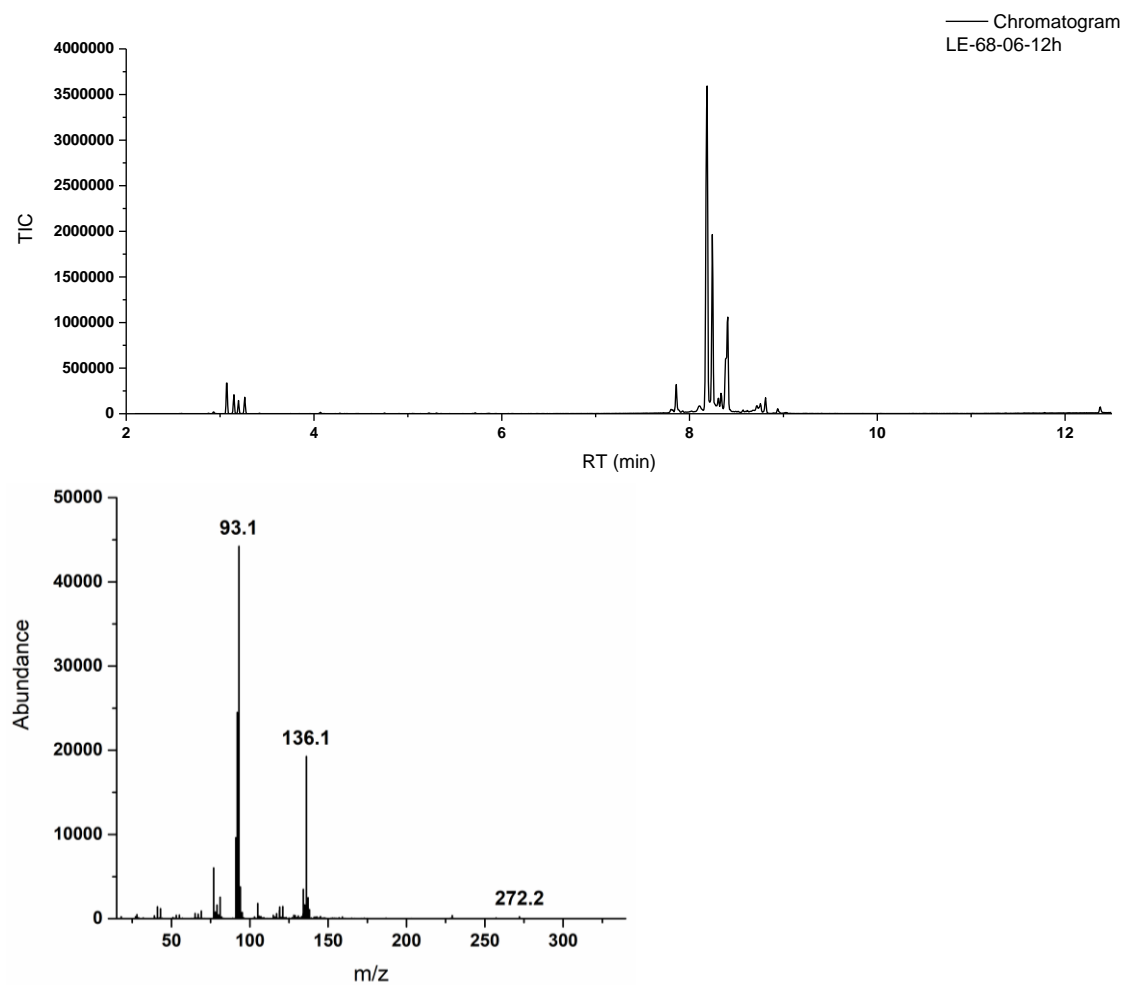

**Fig. S6** Chromatogram trace for  $\alpha$ -phellandrene **1** and 1,1-dinaphthylmethanone **8** sample irradiated for 12 h under 365 nm light (Rayonet photoreactor). The corresponding mass spectrum of the dimers is also shown (RT = 7.5 – 9.0 min).

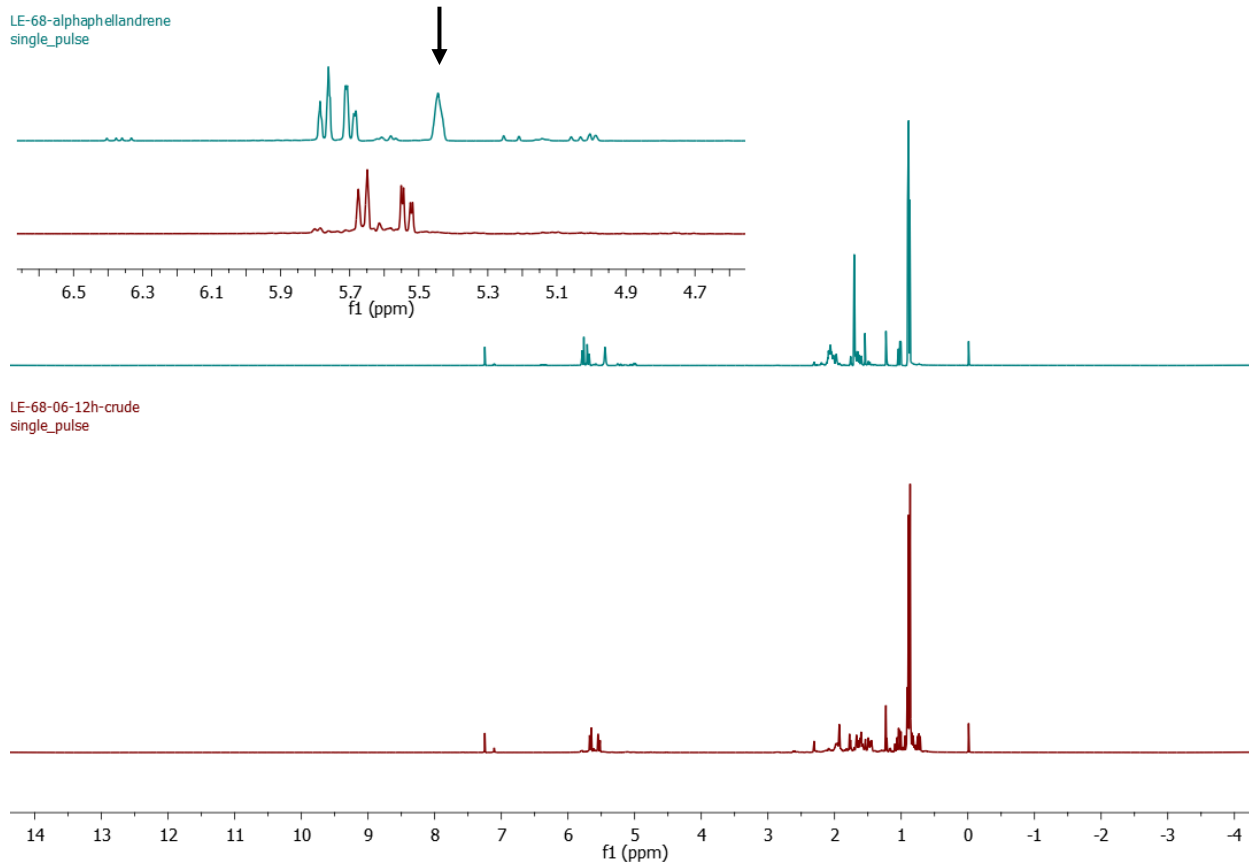

**Fig. S7**  $^1\text{H}$  NMR spectra for starting material  $\alpha$ -phellandrene **1** (**top**, blue) compared to  $\alpha$ -phellandrene **1** and 1,1-dinaphthylmethanone **8** sample irradiated for 12 h under 365 nm light (**bottom**, red). Inset: the black arrow indicates the multiplet at 5.44 ppm which is absent after dimerization.

## Control experiments

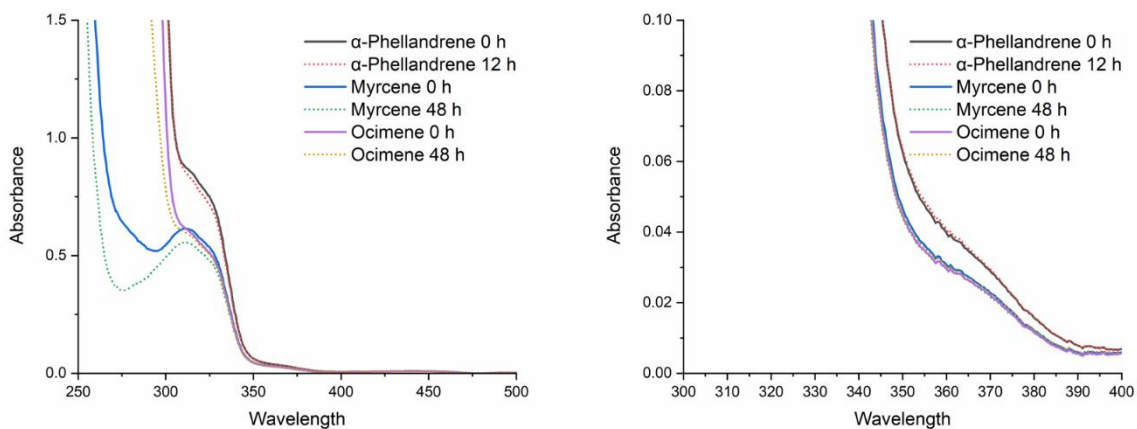

**Fig. S8** UV-Vis absorption spectra of monoterpene reaction mixtures with photosensitizer **8**, measured before and after irradiation. In  $\alpha$ -phellandrene reaction, the amount of **8** in the reaction was 0.2 mol%, while for myrcene and ocimene this amount was of 0.5 mol%. For the absorption spectra measurement the samples were diluted in cyclohexane to reach a concentration of **8** of about 100  $\mu$ M.

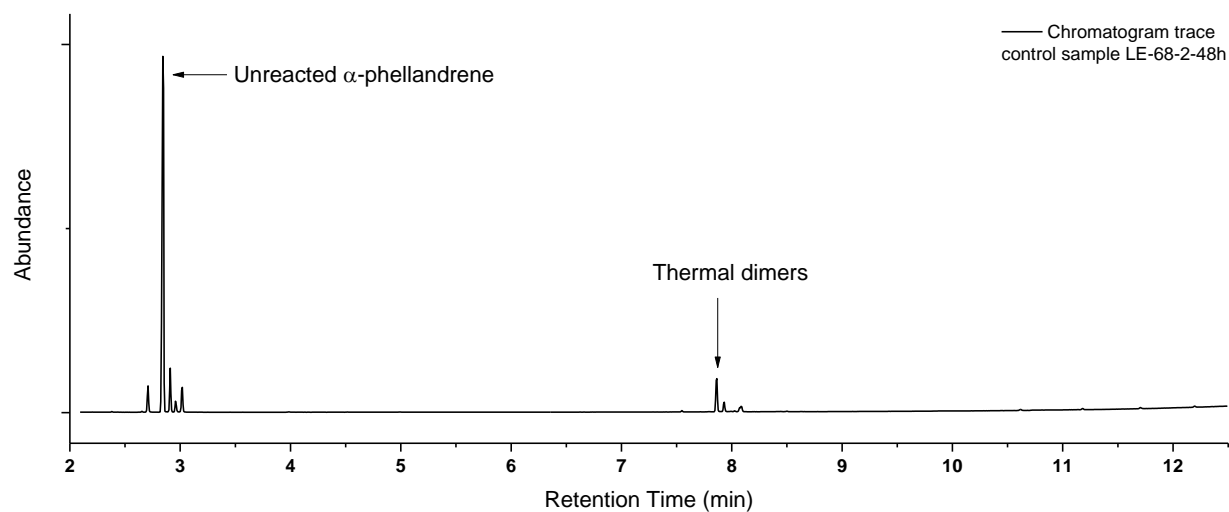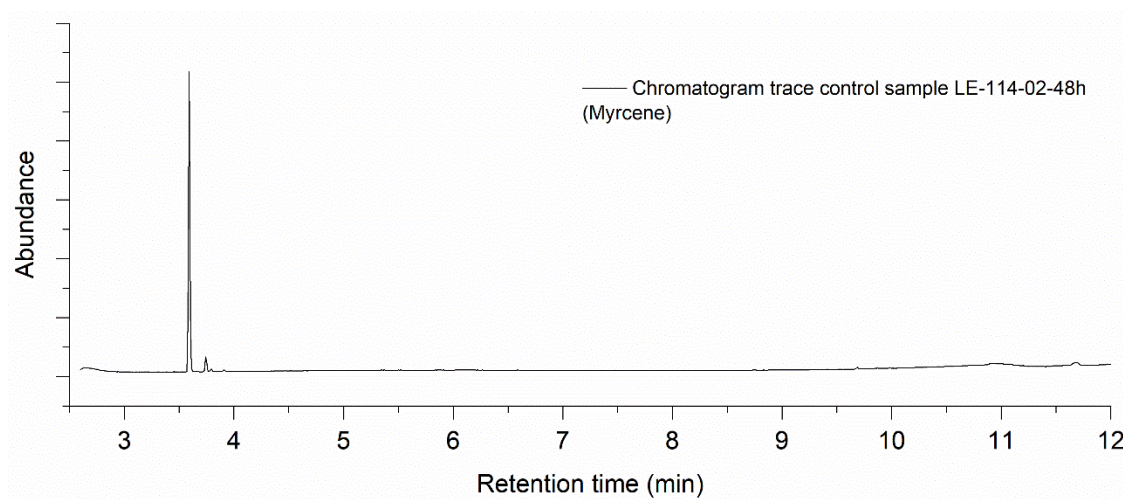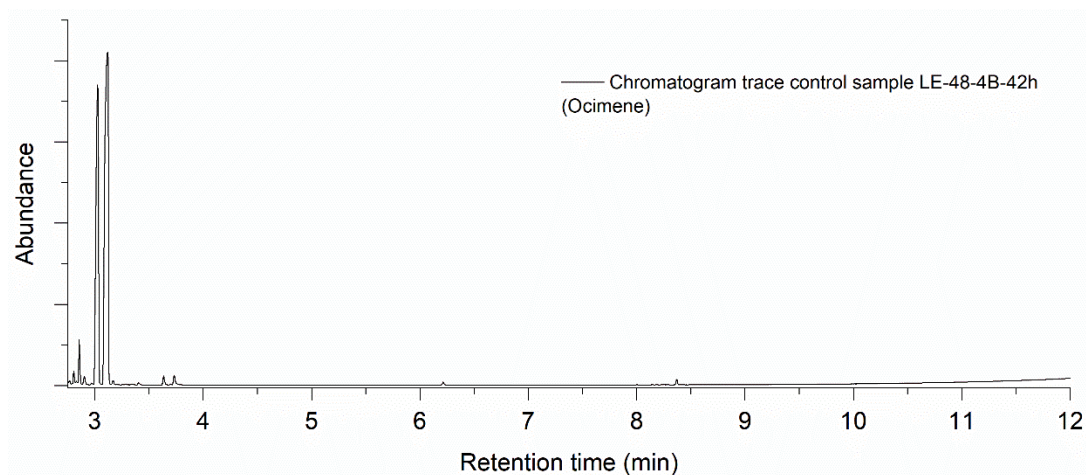

**Fig. S9** GC-MS trace for  $\alpha$ -phellandrene **1** (top), myrcene **2** (middle) and ocimene **3** (bottom) samples irradiated at 365 nm light, in quartz test tube, for 48h without photosensitizer added.

## Myrcene dimerization

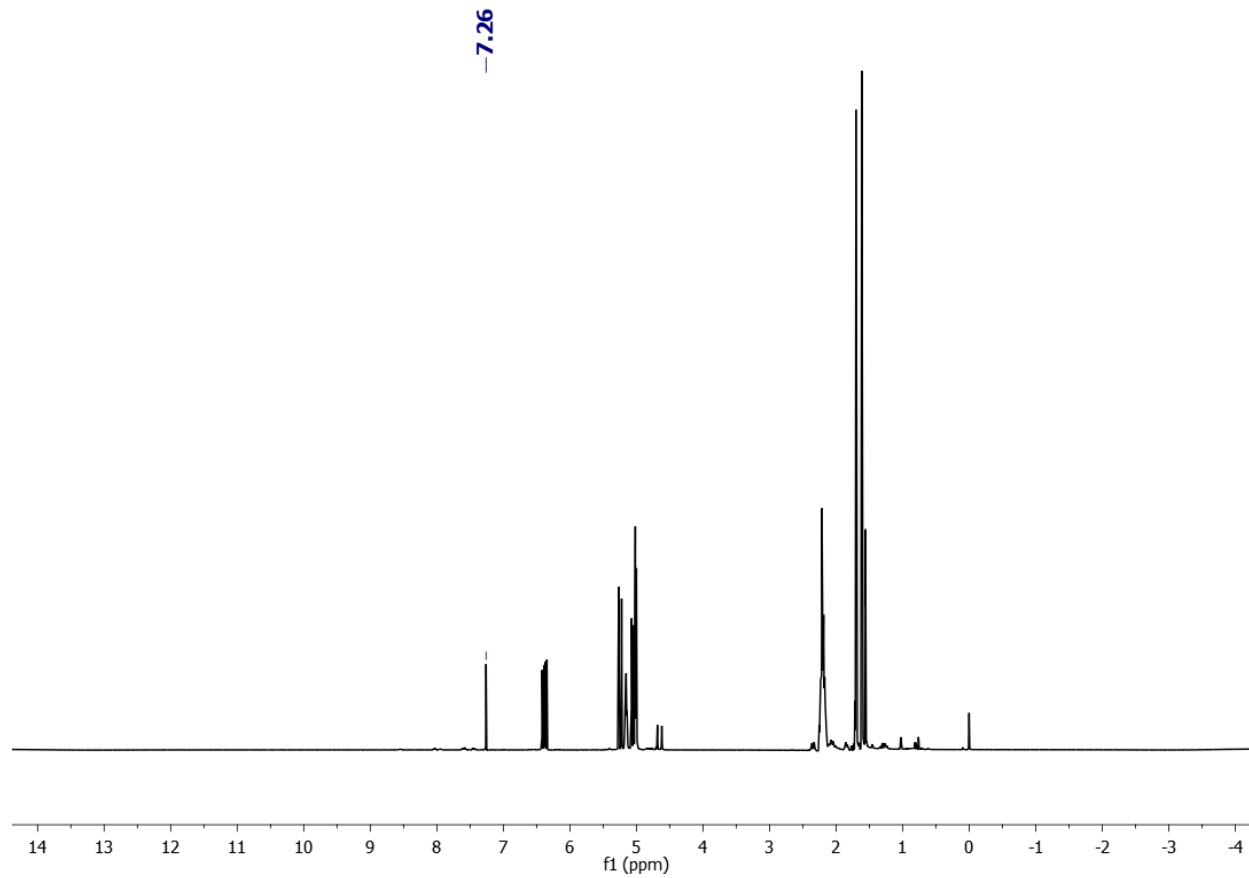

**Fig. S10** Myrcene **2** and 1,1-dinaphthylmethanone **8** sample before irradiation. CDCl<sub>3</sub> was used as deuterated solvent and the spectrum was referenced to its residual peak.



LE-73-04-48h-crude-quant-1  
single\_pulse

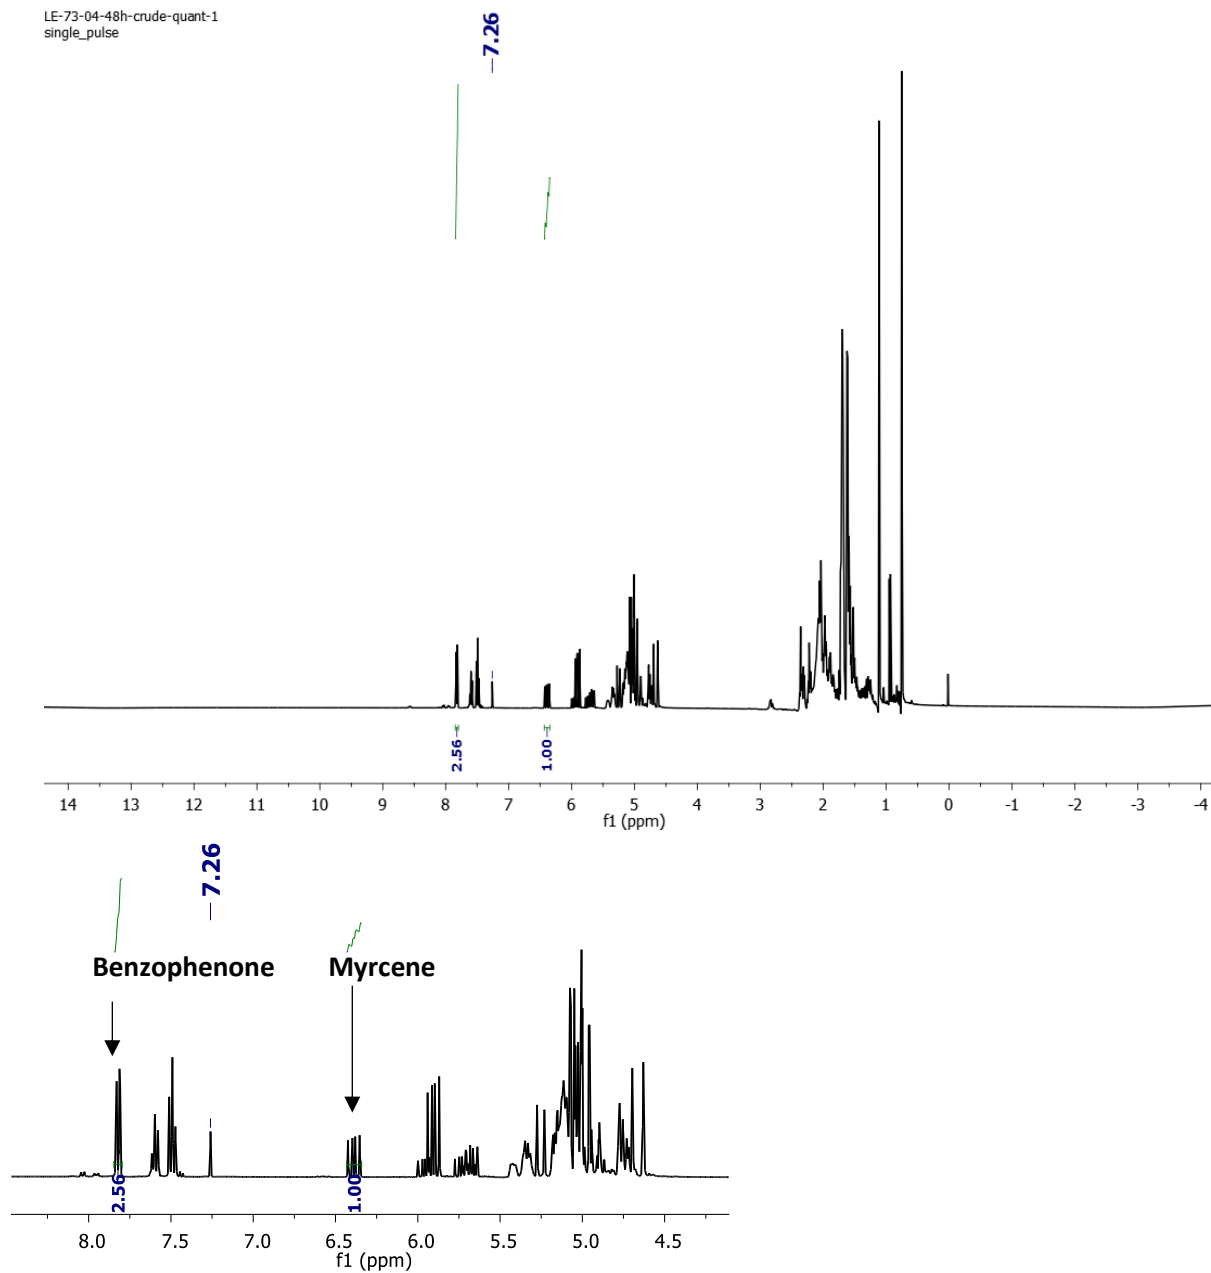

**Fig. S11** <sup>1</sup>H NMR spectrum of myrcene **2** and 1,1-dinaphthylmethanone **8** crude sample after irradiation (365 nm, 48 h). Full spectrum on top, and expansion of alkene region at the bottom. <sup>1</sup>H NMR for quantification of unreacted myrcene (89.1 mg of crude sample) with benzophenone used as standard (5.6 mg). CDCl<sub>3</sub> was used as deuterated solvent and the spectrum was referenced to its residual peak. Reaction carried out in the coiled FEP setup.

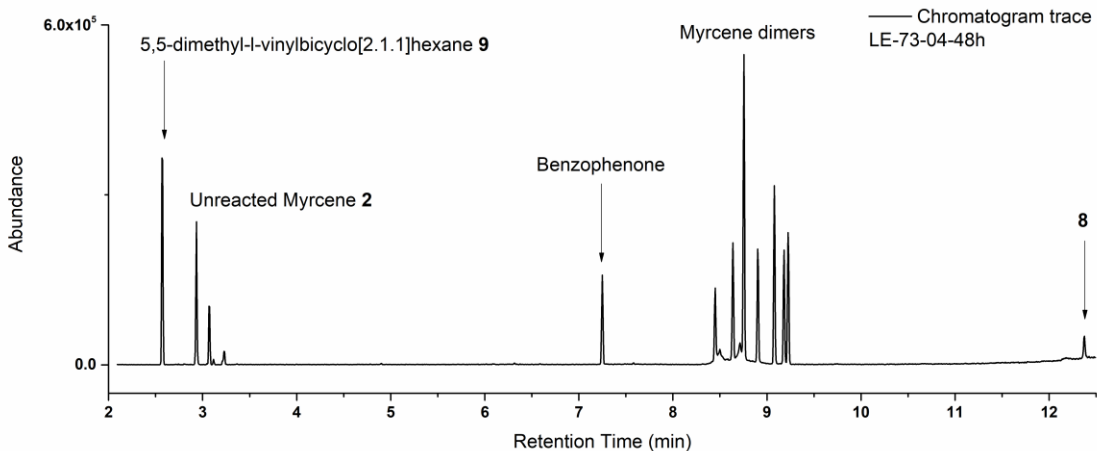

**Fig. S12** Chromatogram trace for myrcene **2** and 1,1-dinaphthylmethanone **8** crude sample after irradiation ( $\lambda = 365$  nm,  $t = 48$  h) with added benzophenone used as standard on the qNMR (see Fig. S9). Byproduct **9**, as well as the unreacted myrcene are indicated.

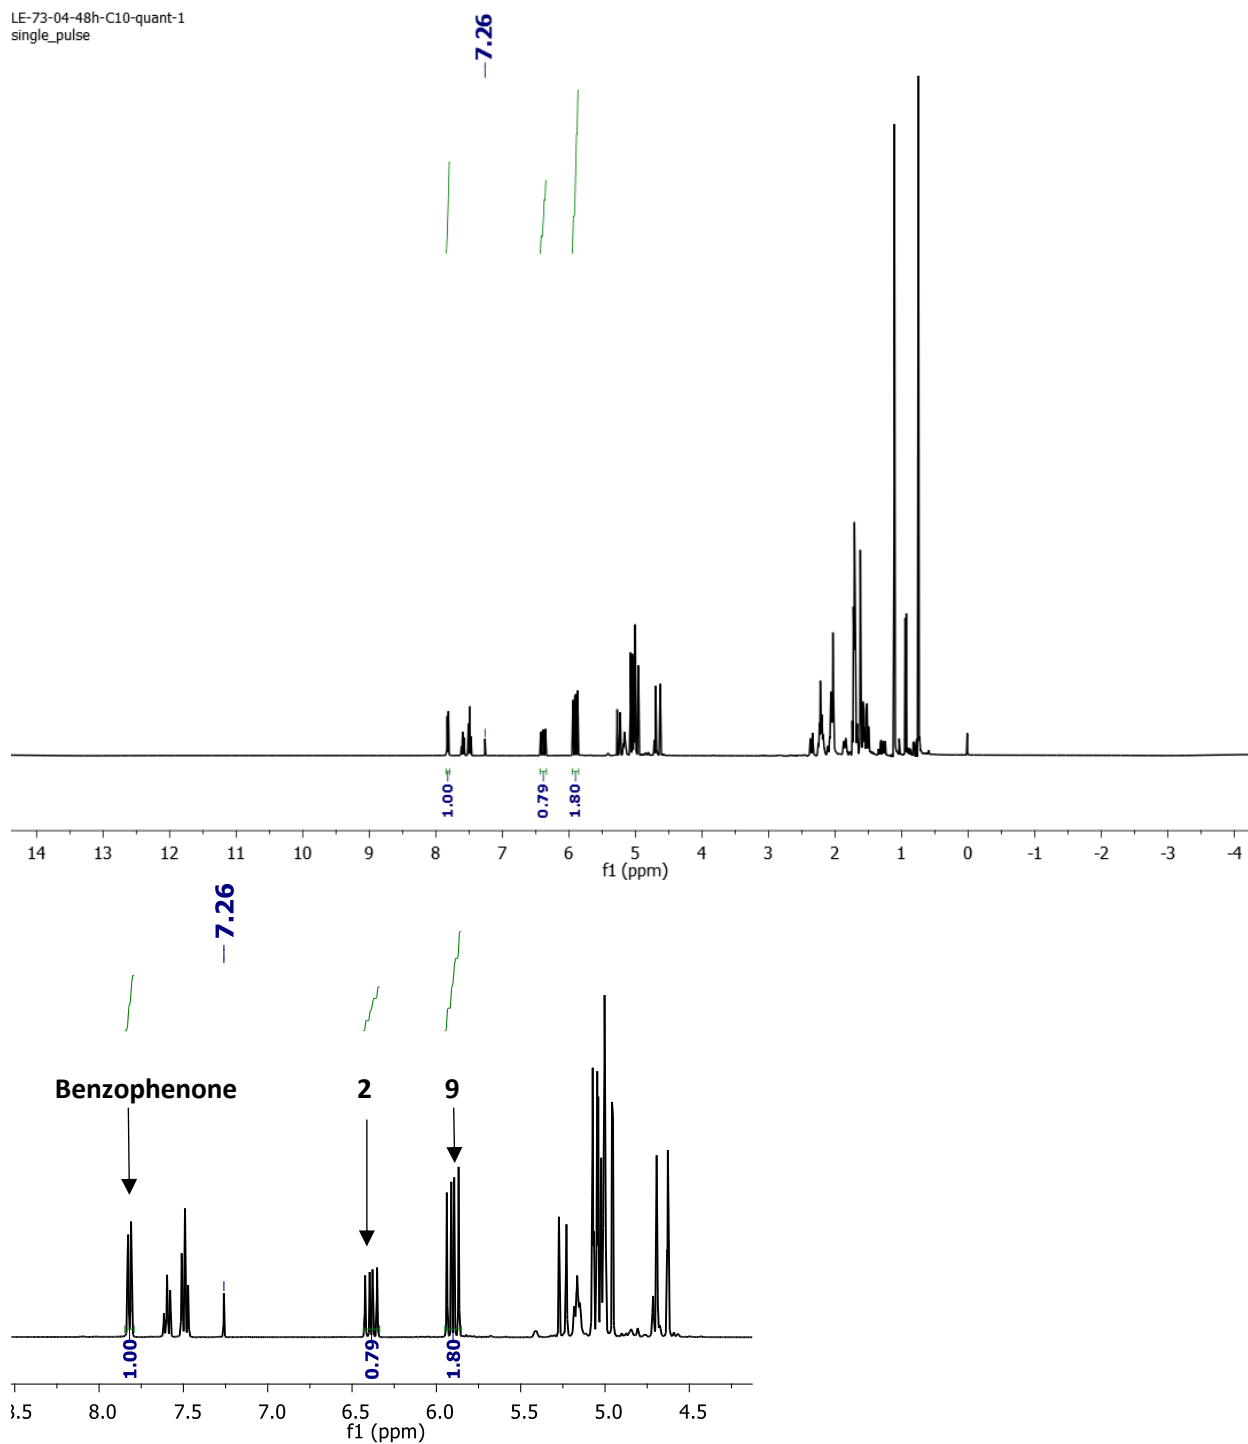

**Fig. S13** C<sub>10</sub> fraction recovered after distillation of crude reacted mixture of myrcene **2** and 1,1-dinaphthylmethanone **8** (365 nm, 48 h). <sup>1</sup>H NMR for quantification of recovered 5,5-dimethyl-1-vinylbicyclo[2.1.1]hexane **9** produced as byproduct during the reaction (63.3 mg of recovered C<sub>10</sub> sample) with benzophenone used as standard (5.8 mg). Recovered unreacted myrcene was also verified. CDCl<sub>3</sub> was used as deuterated solvent and the spectrum was referenced to its residual peak.

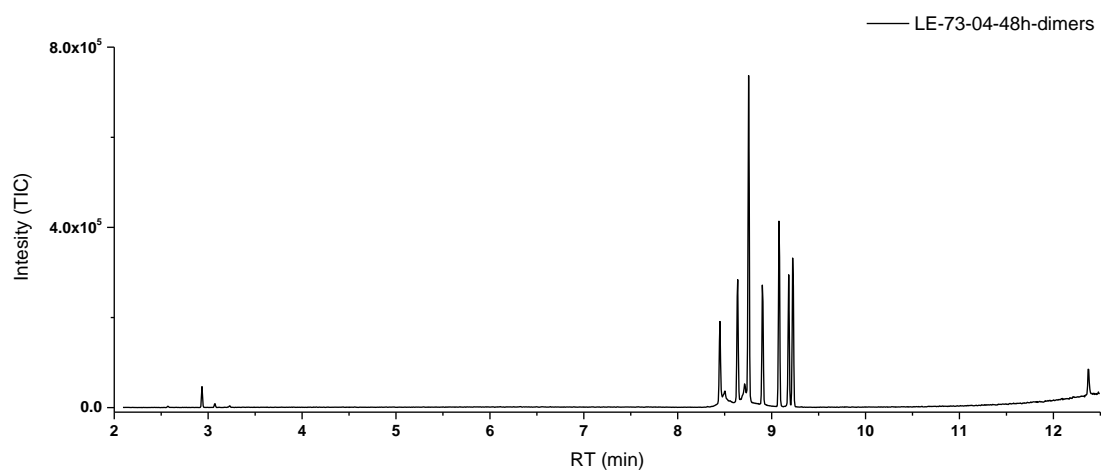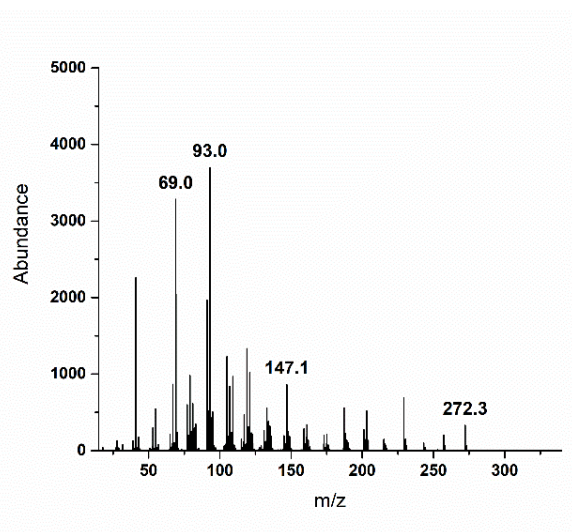

**Fig. S14** GC-MS chromatogram of dimers produced through myrcene **2** dimerization ( $\lambda = 365$  nm,  $t = 48$  h). The light fraction was removed by distillation under reduced pressure. **Bottom:** Mass spectrum of dimers.

LE-73-04-48h-dimers-1  
single\_pulse

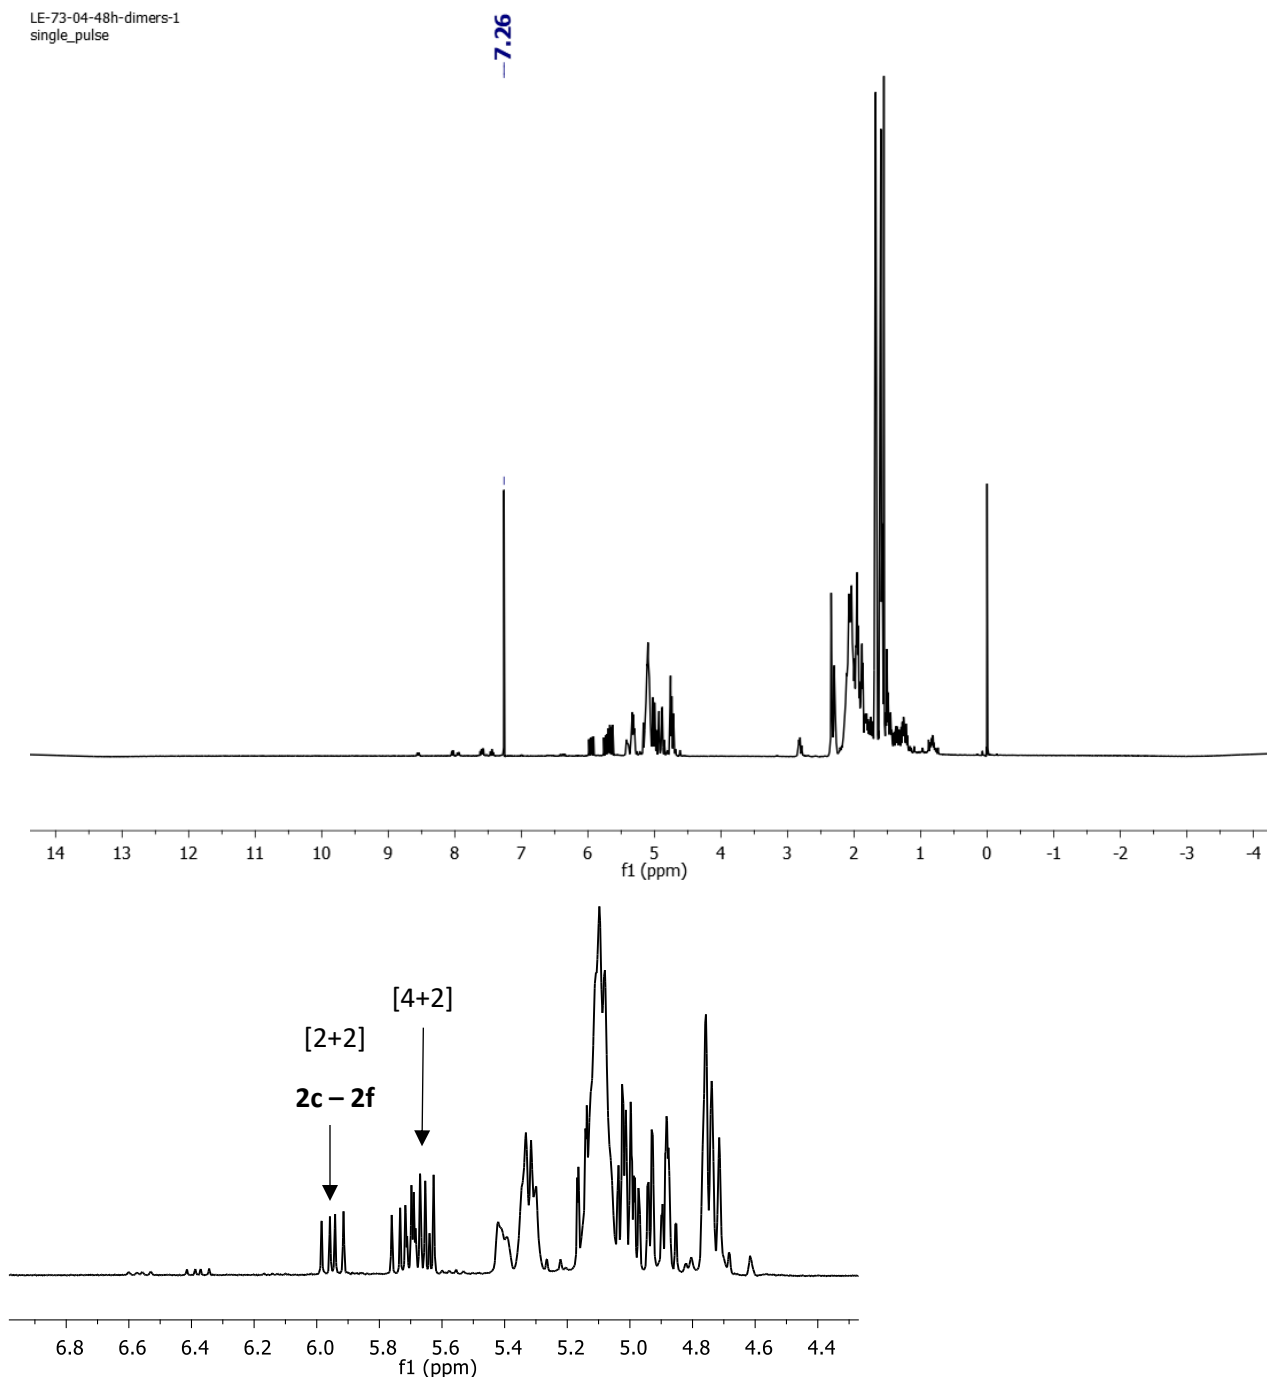

**Fig. S15** <sup>1</sup>H NMR of dimers produced through myrcene **2** dimerization ( $\lambda = 365$  nm,  $t = 48$  h, top) with expansion of the alkene region (bottom). The light fraction was removed by distillation under reduced pressure. CDCl<sub>3</sub> was used as deuterated solvent and the spectrum was referenced to its residual peak. On the chromatogram it is possible to see trace amounts of unreacted myrcene that remained after the distillation.

# Myrcene epoxide dimerization

LE-97-02-ST-quant-2  
single\_pulse

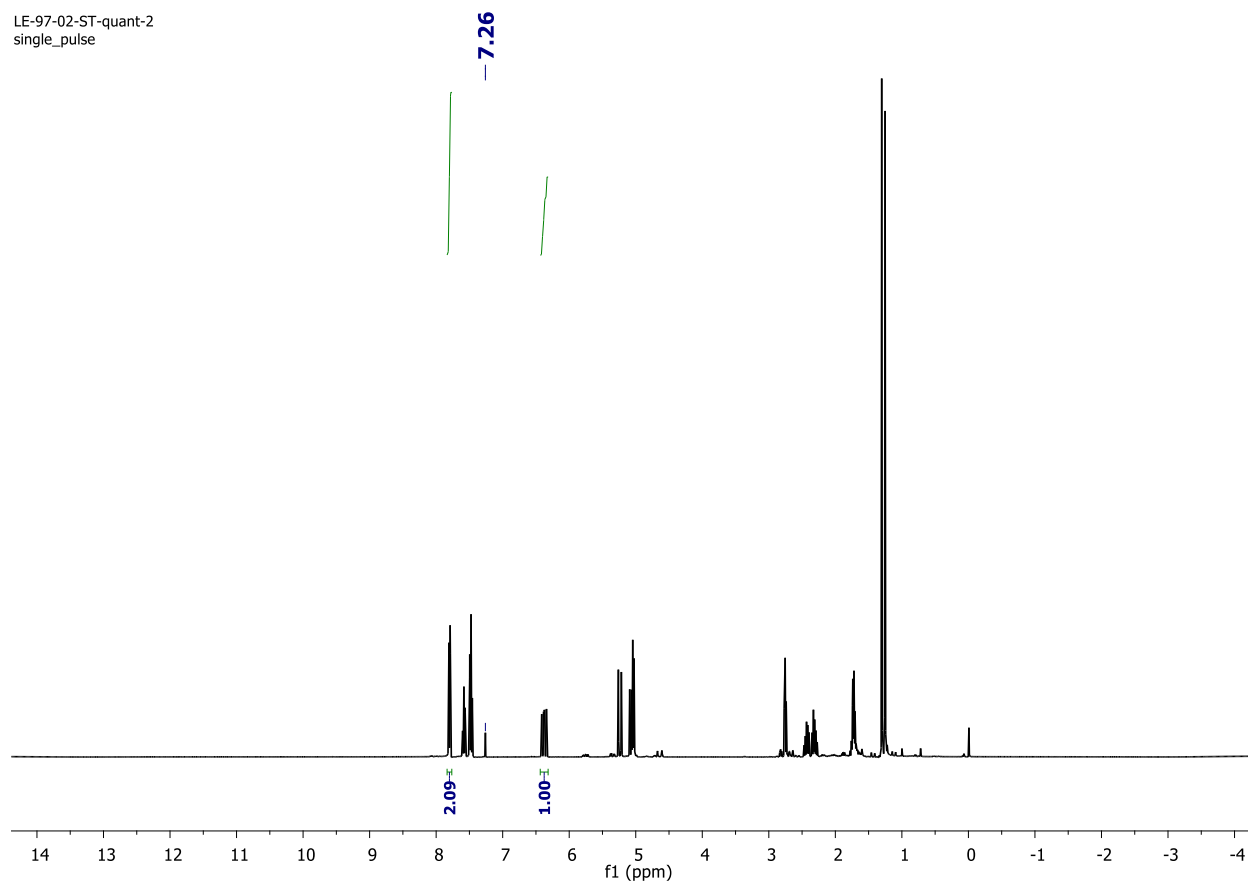

**Fig. S16**  $^1\text{H}$  NMR for purity quantification of myrcene epoxide **10** (11.4 mg) with benzophenone used as standard (11.3 mg).  $\text{CDCl}_3$  was used as deuterated solvent and the spectrum was referenced to its residual peak. m/m purity for myrcene epoxide was found to be of 85%.

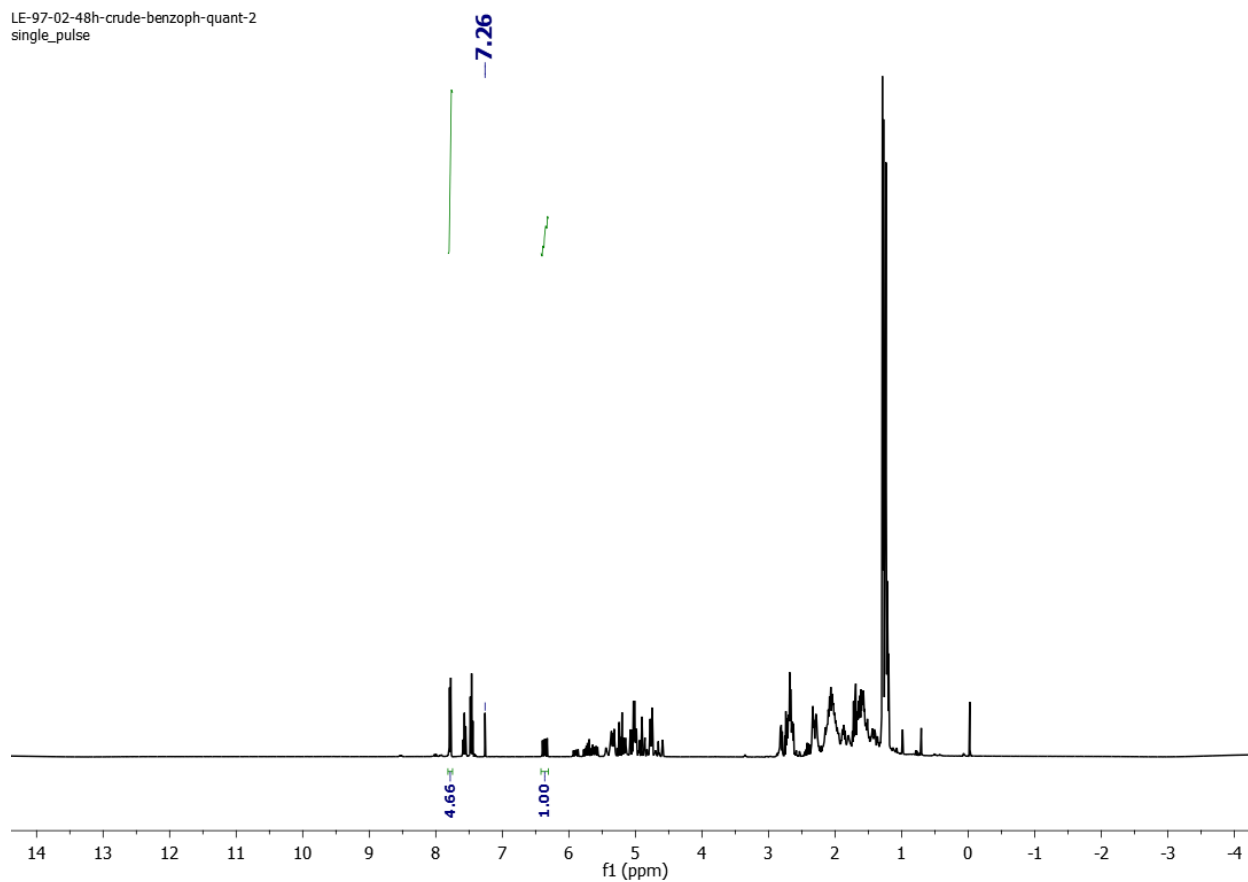

**Fig. S17** <sup>1</sup>H NMR for quantification of unreacted myrcene epoxide **10** on the crude mixture after irradiation  $\lambda = 365$  nm for 48 h (49.5 mg of crude sample) with benzophenone used as standard (4.1 mg). CDCl<sub>3</sub> was used as deuterated solvent and the spectrum was referenced to its residual peak. The unreacted myrcene epoxide **10** was found to be of 6.7 wt%.

LE-97-02-48h-dimers  
single\_pulse

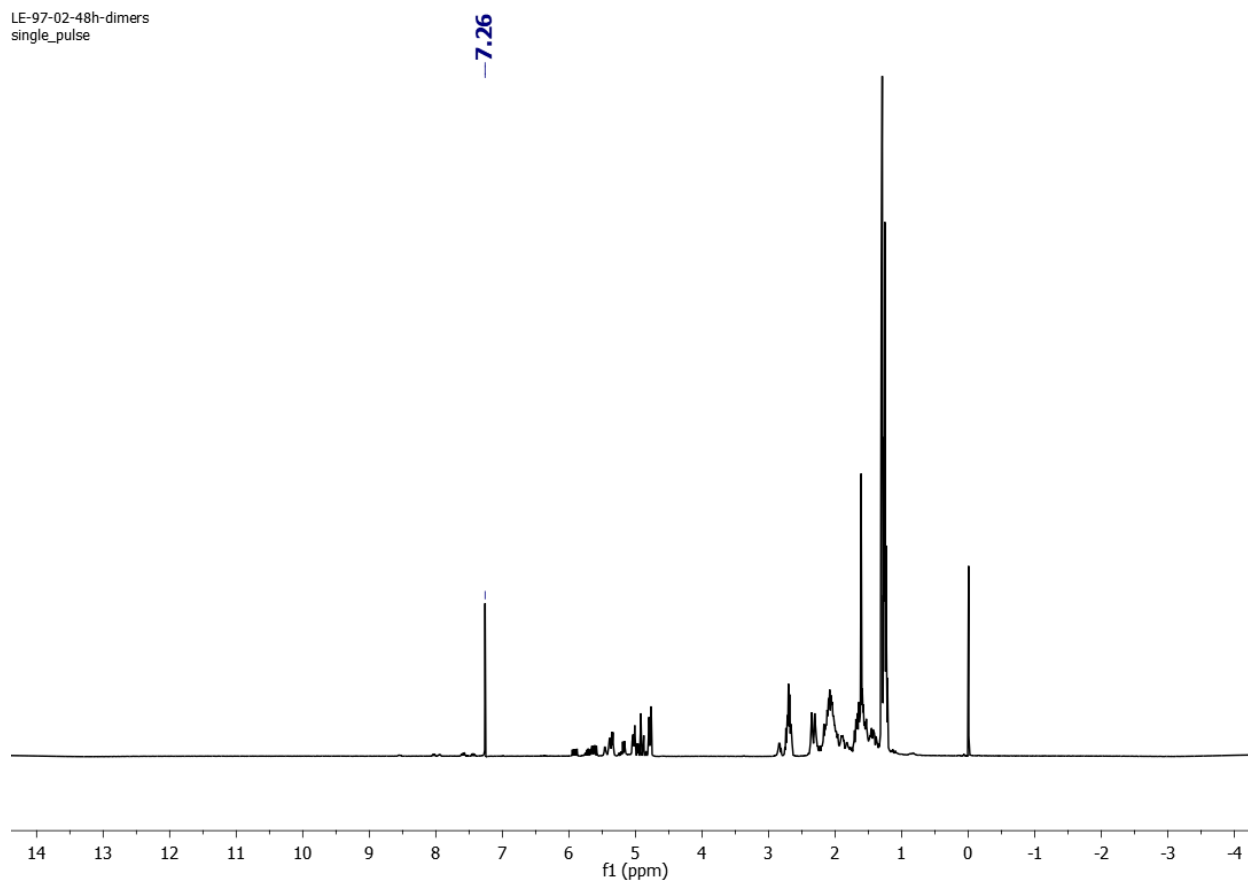

**Fig. S18** <sup>1</sup>H NMR of dimers produced through myrcene epoxide **10** dimerization ( $\lambda = 365$  nm,  $t = 48$  h). The light fraction was removed by distillation under reduced pressure.  $\text{CDCl}_3$  was used as deuterated solvent and the spectrum was referenced to its residual peak.



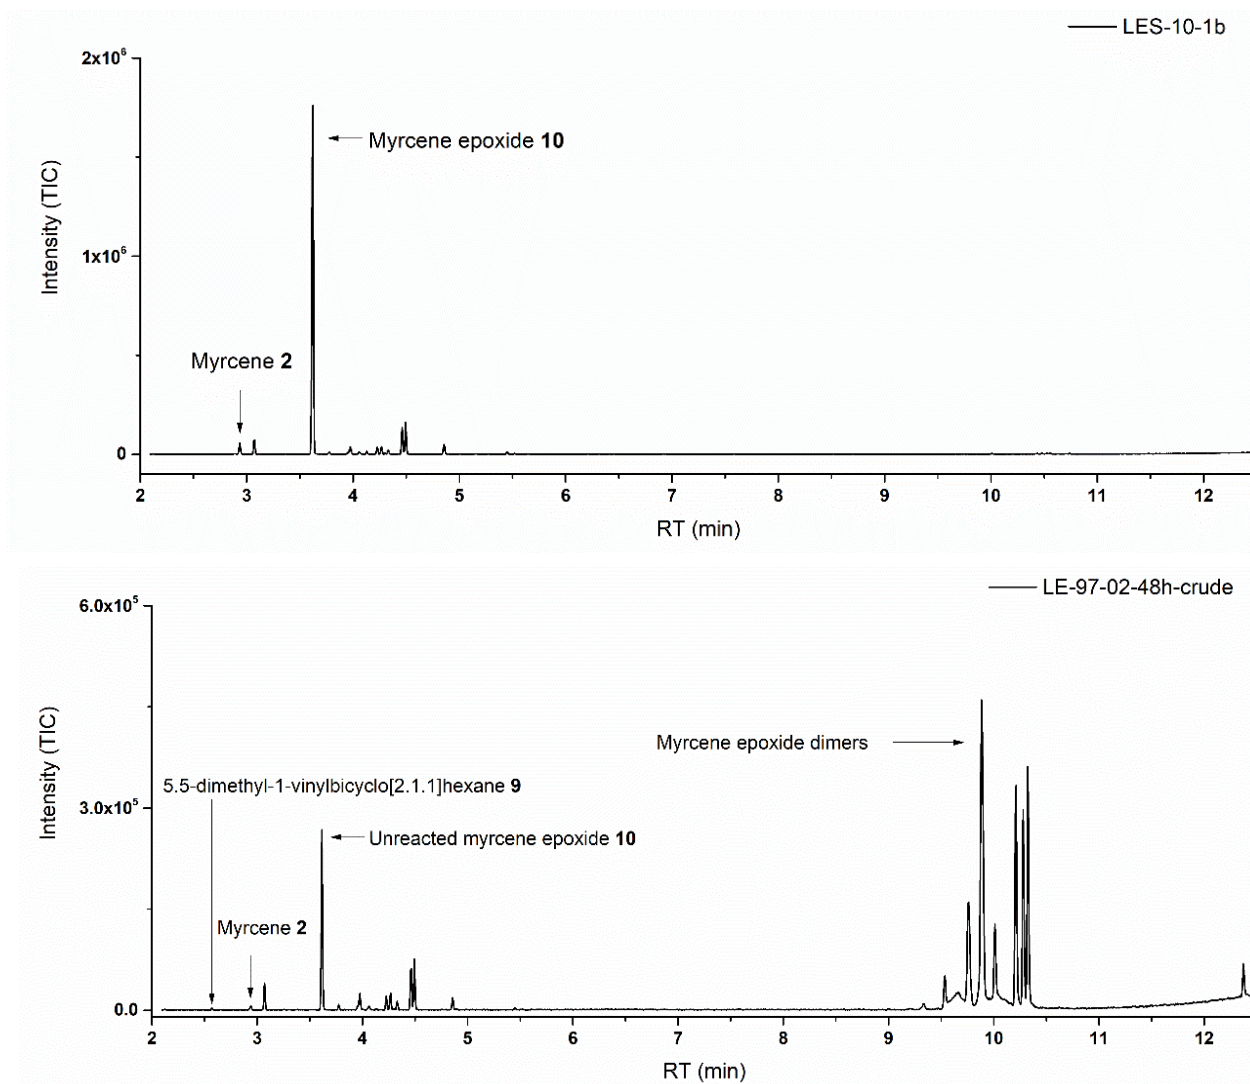

**Fig. S19** Chromatogram trace for myrcene epoxide **10** starting material (**top**) and 48 h irradiated crude mixture of **10** with **8** ( $\lambda = 365$  nm,  $t = 48$  h, **bottom**). A small amount of myrcene remained after epoxidation and can be seen on the starting material chromatogram (**top**) which is partially converted to the small amount of 5,5-dimethyl-1-vinylbicyclo[2.1.1]hexane **9** on the crude reacted mixture (**bottom**). These chromatograms also show that the impurities from the epoxidation reaction remained unreacted.

## Ocimene dimerization

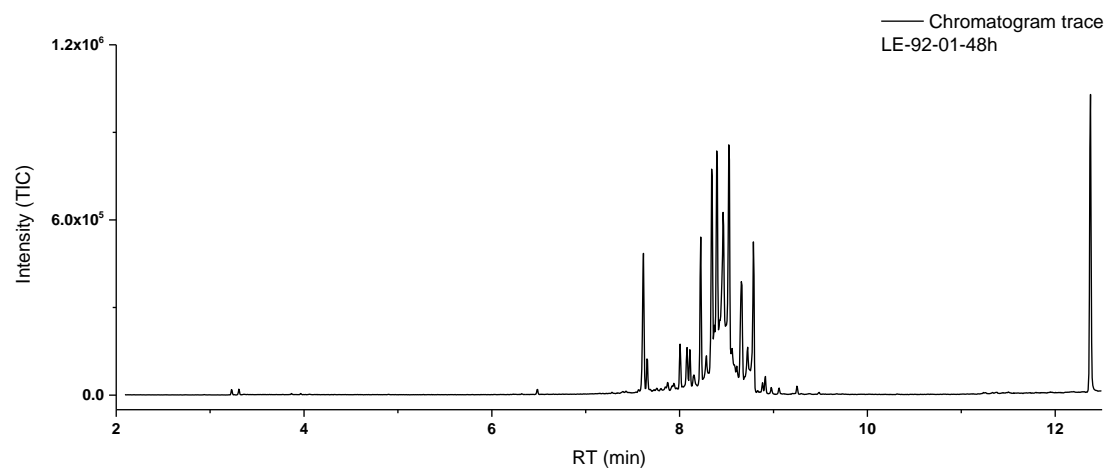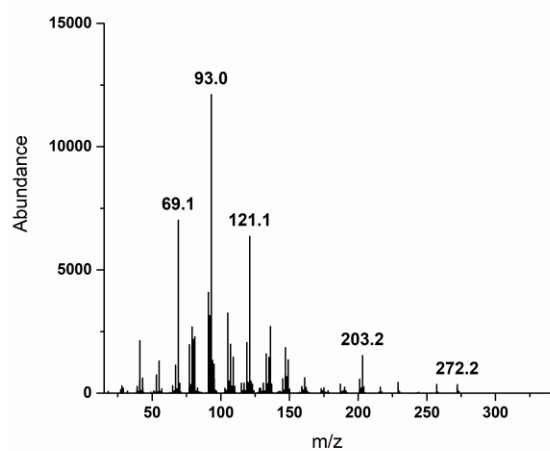

**Fig. S20 Top:** GC-MS chromatogram of dimers produced in the ocimene **3** dimerization ( $\lambda = 365$  nm,  $t = 48$  h). The light fraction was removed by distillation under reduced pressure. **Bottom:** Mass spectrum of dimers.

LE-92-01-48h-dimers  
single\_pulse

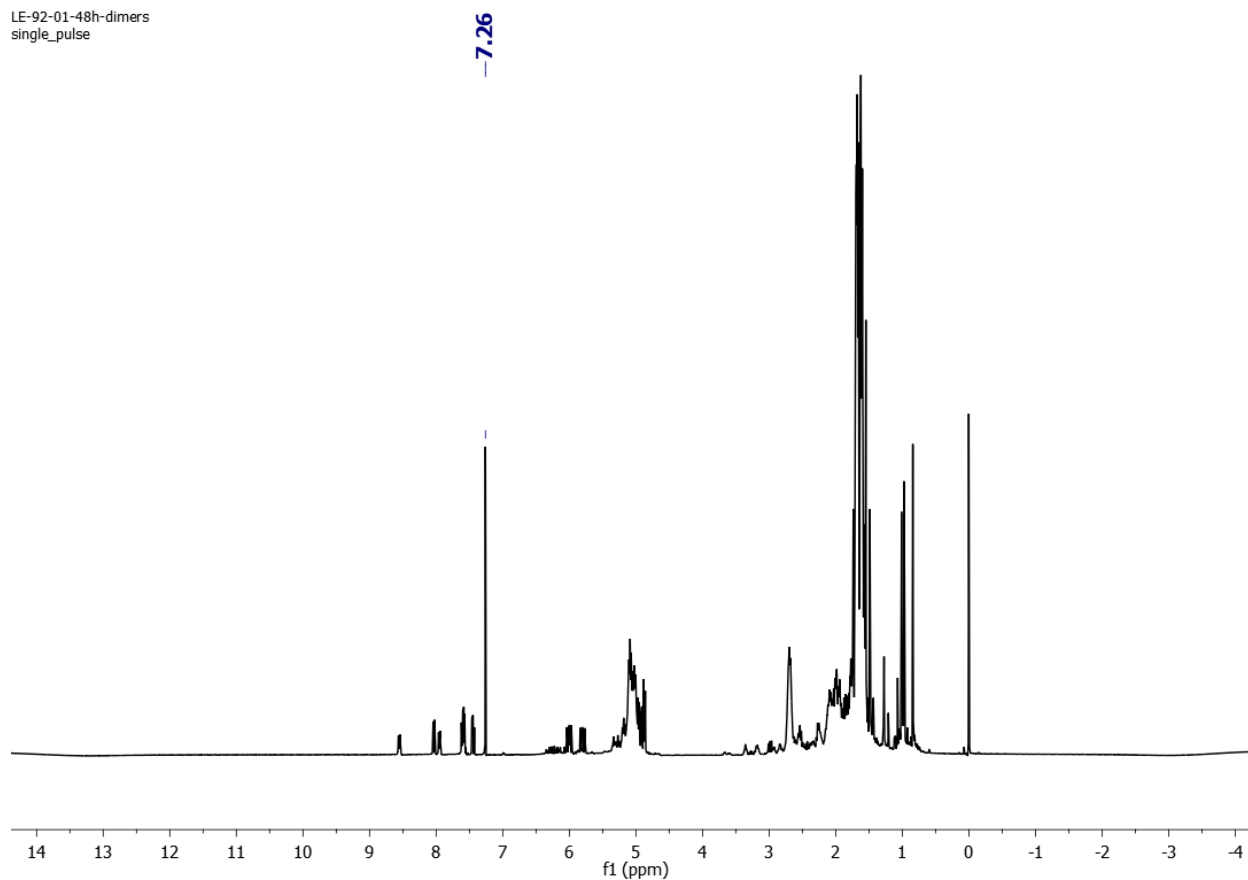

**Fig. S21** <sup>1</sup>H NMR spectrum of dimers produced in the ocimene **3** dimerization ( $\lambda = 365$  nm,  $t = 48$  h). The light fraction was removed by distillation under reduced pressure. CDCl<sub>3</sub> was used as deuterated solvent and the spectrum was referenced to its residual peak.

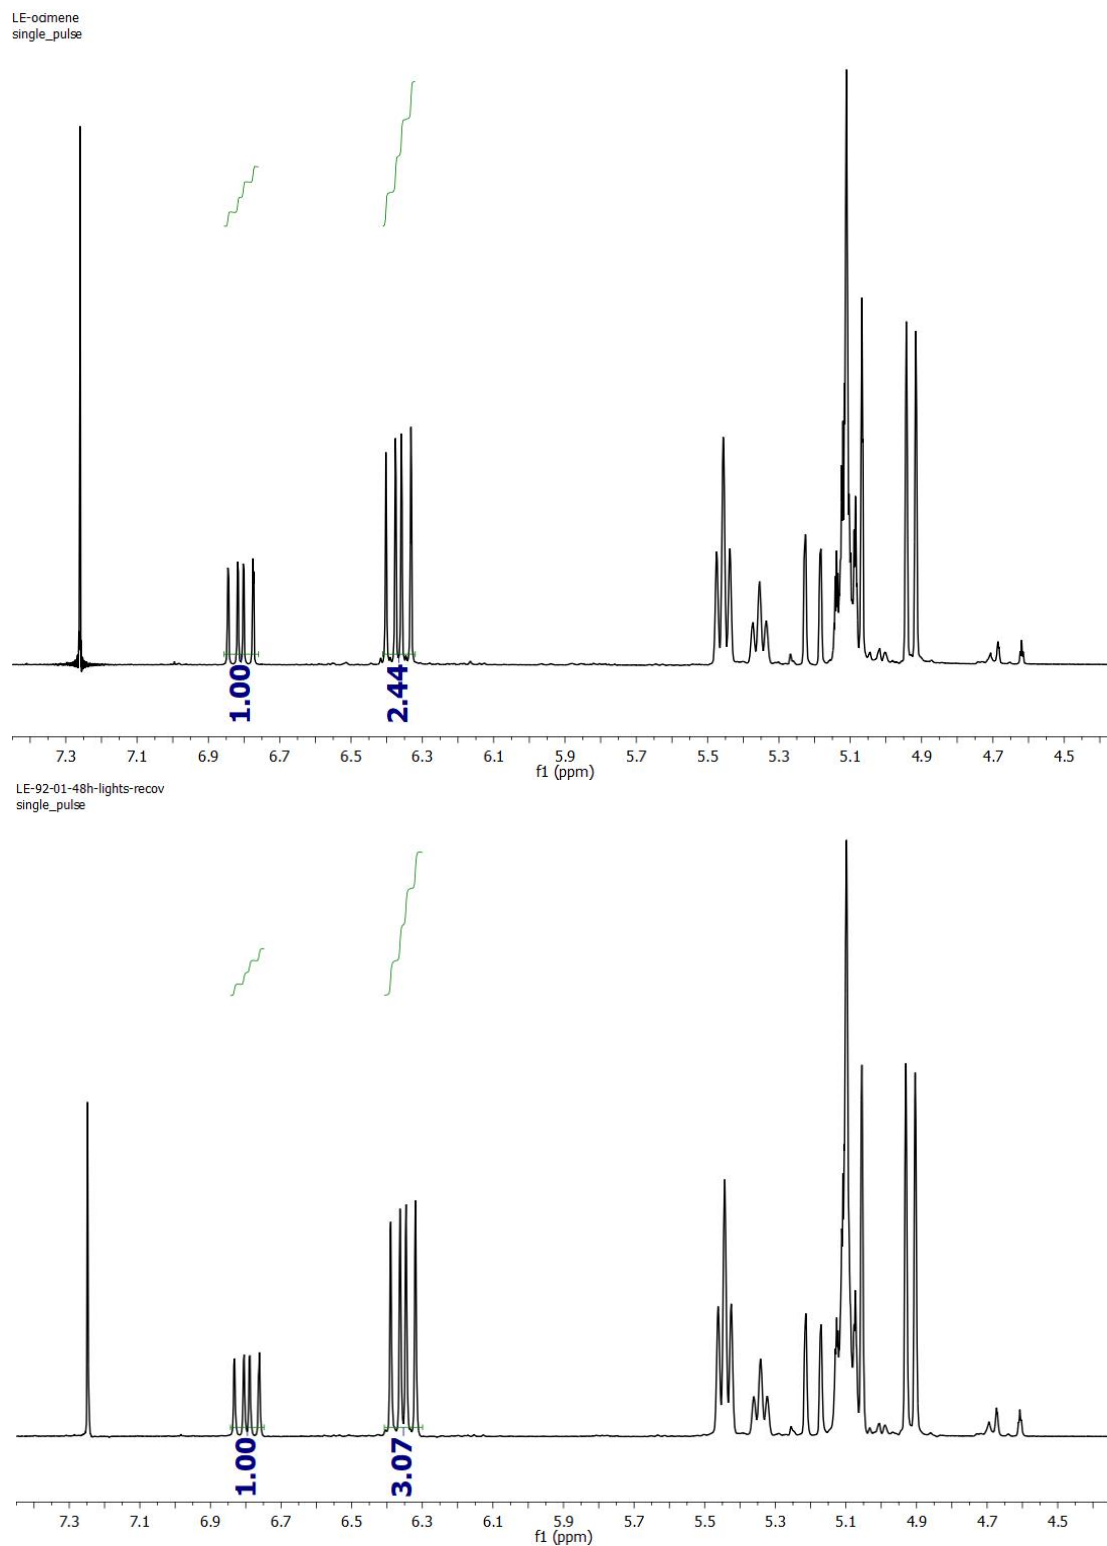

**Fig. S22**  $^1\text{H}$  NMR spectra of ocimene **3** before (**top**) and after irradiation (**bottom**),  $\lambda = 365$  nm,  $t = 48$  h. The *E/Z* ratio of ocimene was calculated based on the integrals showed on the spectra, for the proton of the conjugated diene moiety. The *E*-isomer has chemical shift at 6.35 ppm, and the *Z*-isomer has chemical shift at 6.80.

## Light intensity experiments

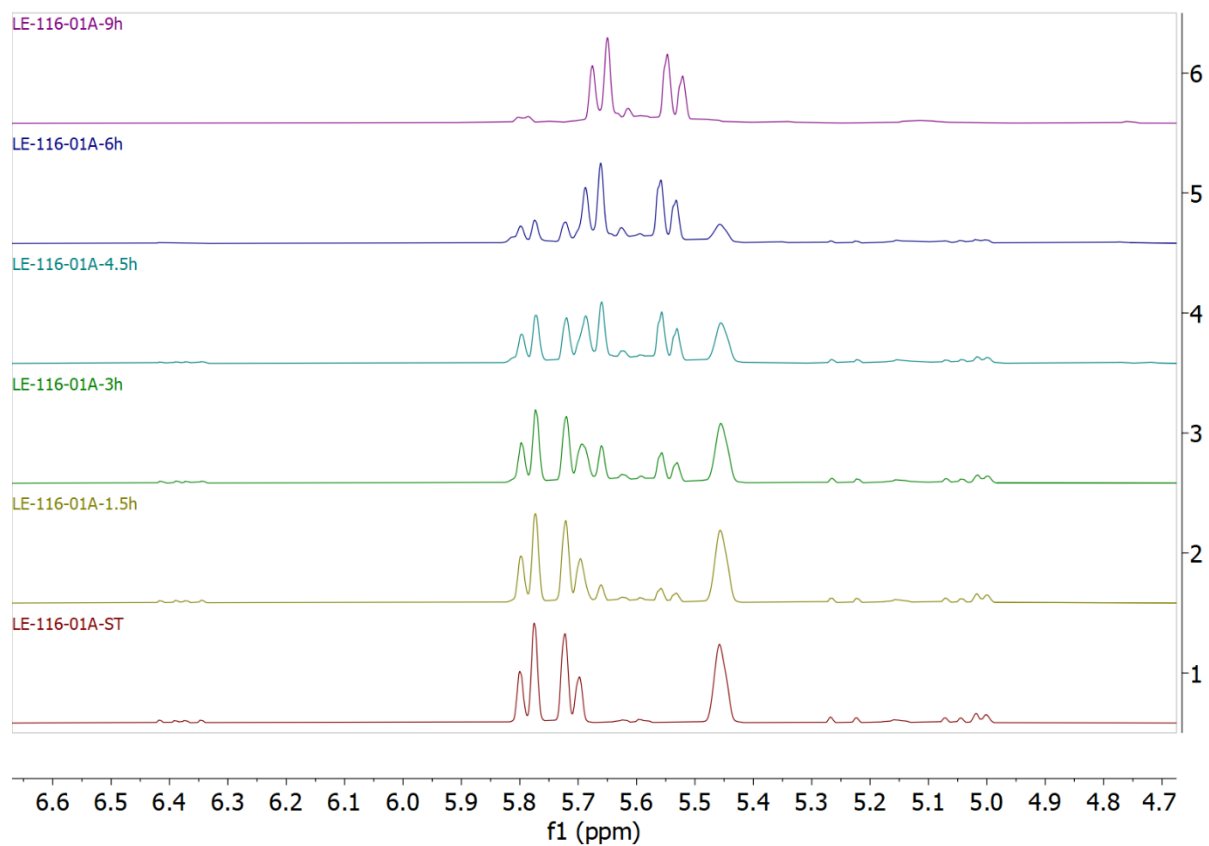

**Fig. S23** <sup>1</sup>H NMR spectra of crude mixture of  $\alpha$ -phellandrene and 0.2 mol% of **8**, in different irradiation times. Light intensity: 6.5 mW s<sup>-2</sup>.

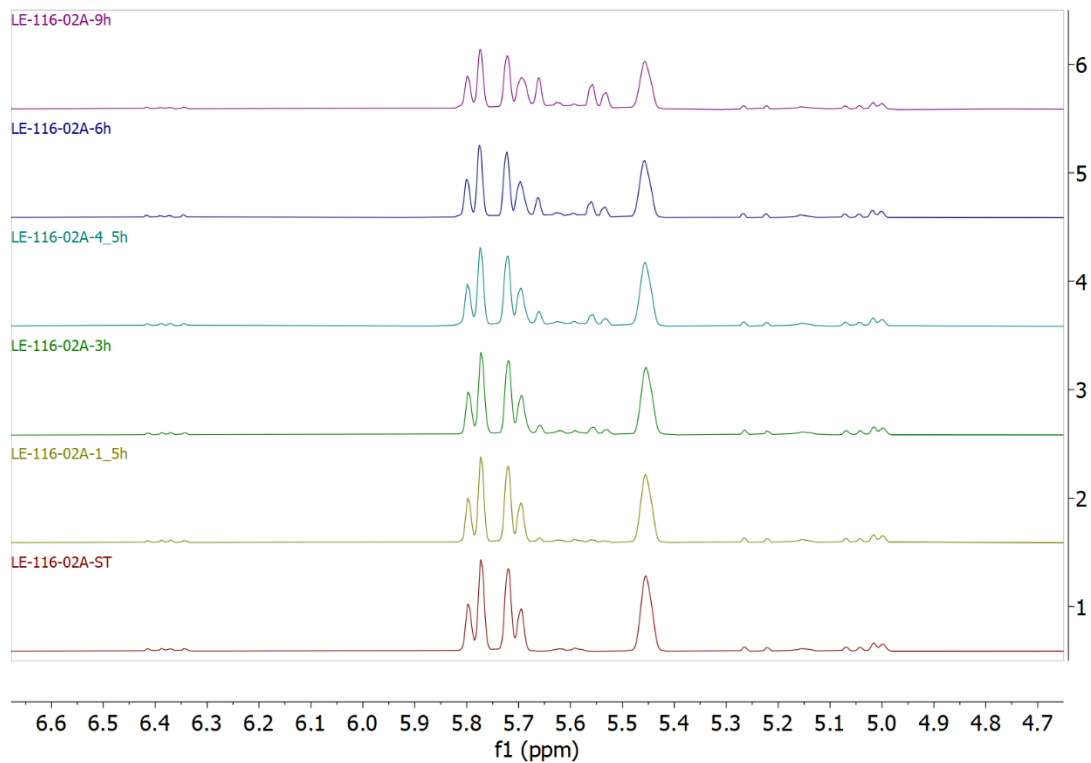

**Fig. S24** <sup>1</sup>H NMR spectra of crude mixture of  $\alpha$ -phellandrene and 0.2 mol% of **8**, in different irradiation times. Light intensity:  $2.0 \text{ mW s}^{-2}$ .

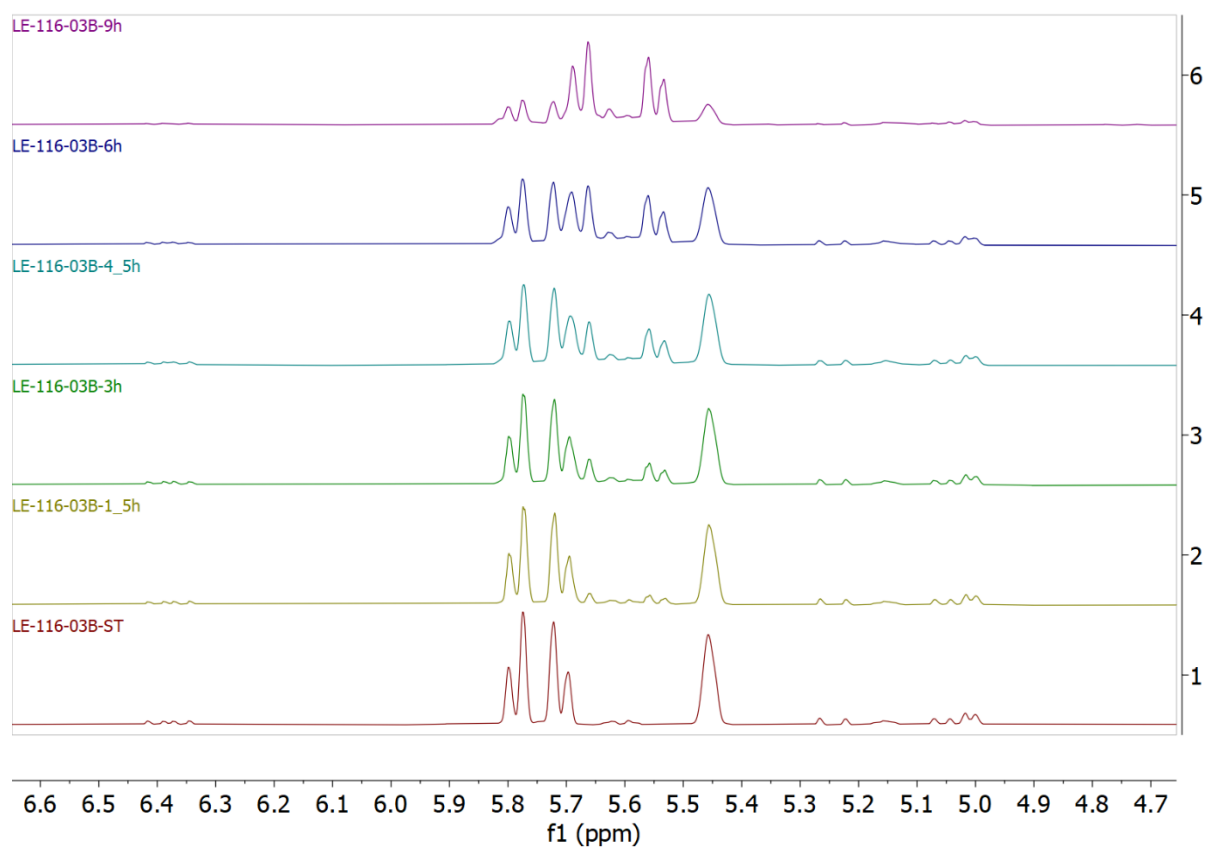

**Fig. S25**  $^1\text{H}$  NMR spectra of crude mixture of  $\alpha$ -phellandrene and 0.2 mol% of **8**, in different irradiation times. Light intensity:  $4.0 \text{ mW s}^{-2}$ .

## Cross-dimerization with $\alpha$ -phellandrene

### Myrcene and $\alpha$ -phellandrene

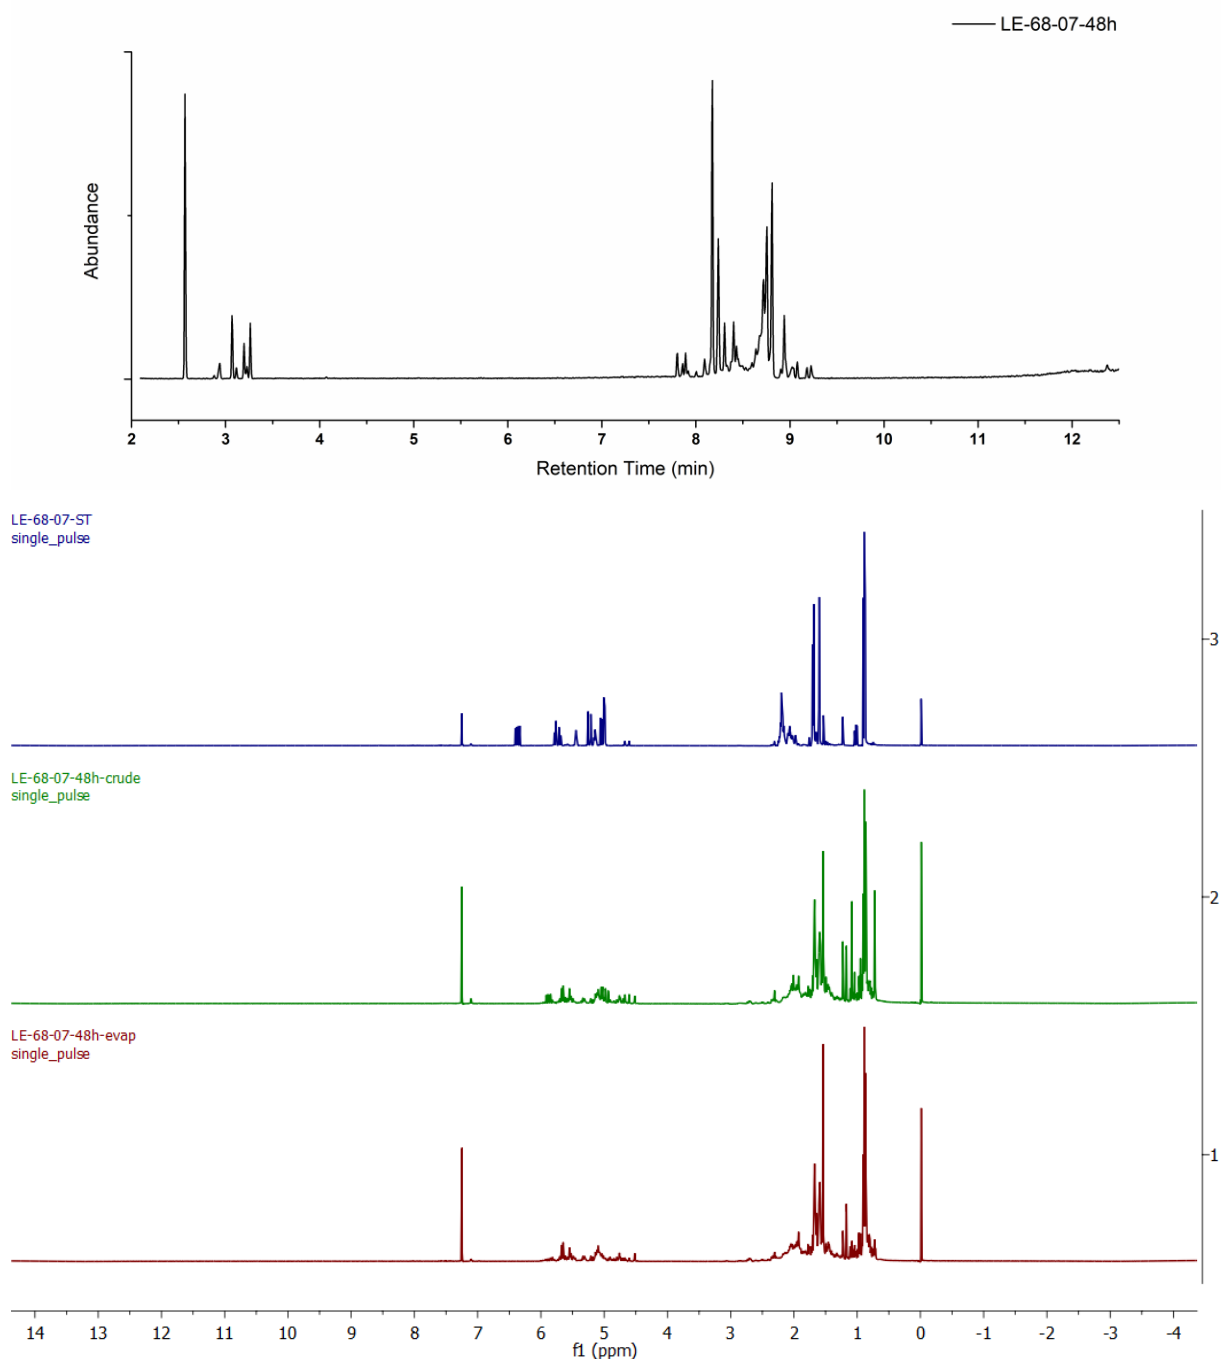

**Fig. S26** Cross-dimerization between  $\alpha$ -phellandrene **1** and myrcene **2** (coiled FEP tubing,  $\lambda = 365$  nm,  $t = 48$  h, 1:1 equivalent). **Top:** GC-MS trace of crude sample after irradiation. **Bottom:** <sup>1</sup>H NMR spectra of sample before irradiation (blue), mixture after irradiation (green) and dimers (red) after distillation of C10 fraction.



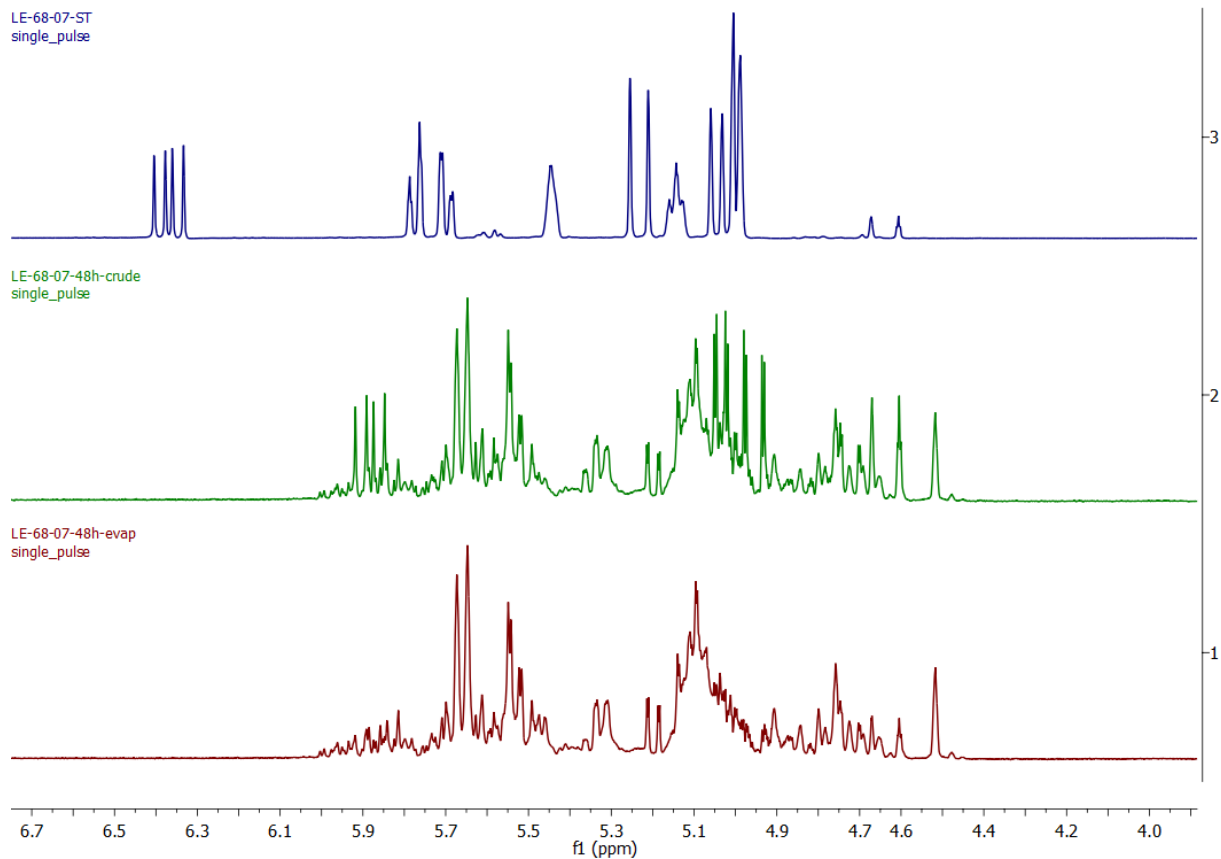

**Fig. S27** Cross-dimerization between  $\alpha$ -phellandrene **1** and myrcene **2** (coiled FEP tubing, 1:1 equivalent,  $\lambda = 365$  nm,  $t = 48$  h). Expansion of <sup>1</sup>H NMR spectra of sample before irradiation (**top**), crude mixture after irradiation (**middle**) and dimers (**bottom**) after distillation of C<sub>10</sub> fraction (see Fig. S16, bottom). Green trace (**middle**) reveals that no myrcene was detected after irradiation.

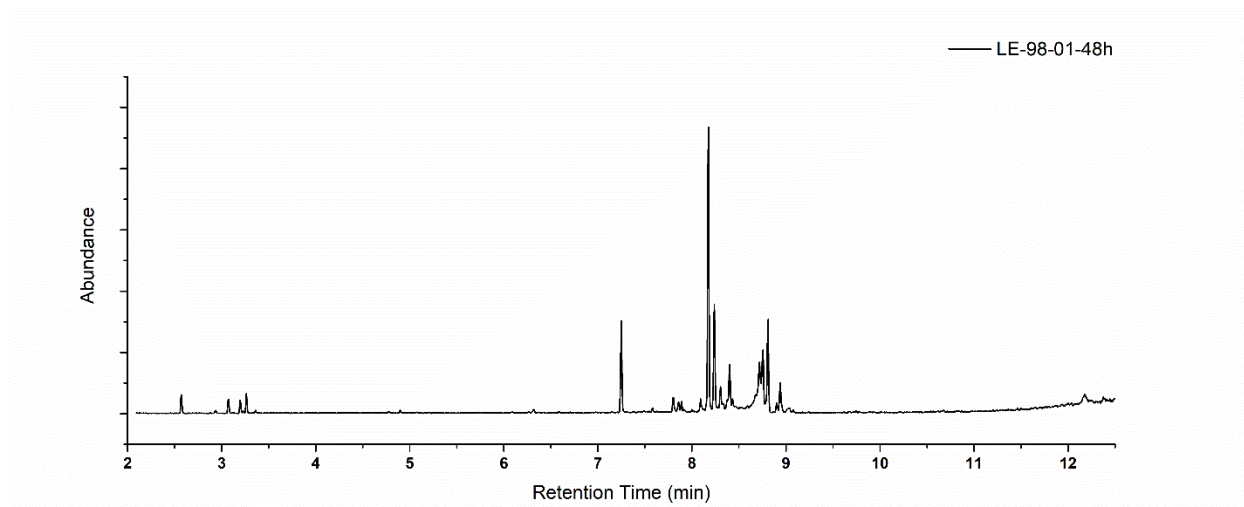

LE-98-01-48h-crude-quant-1  
single\_pulse

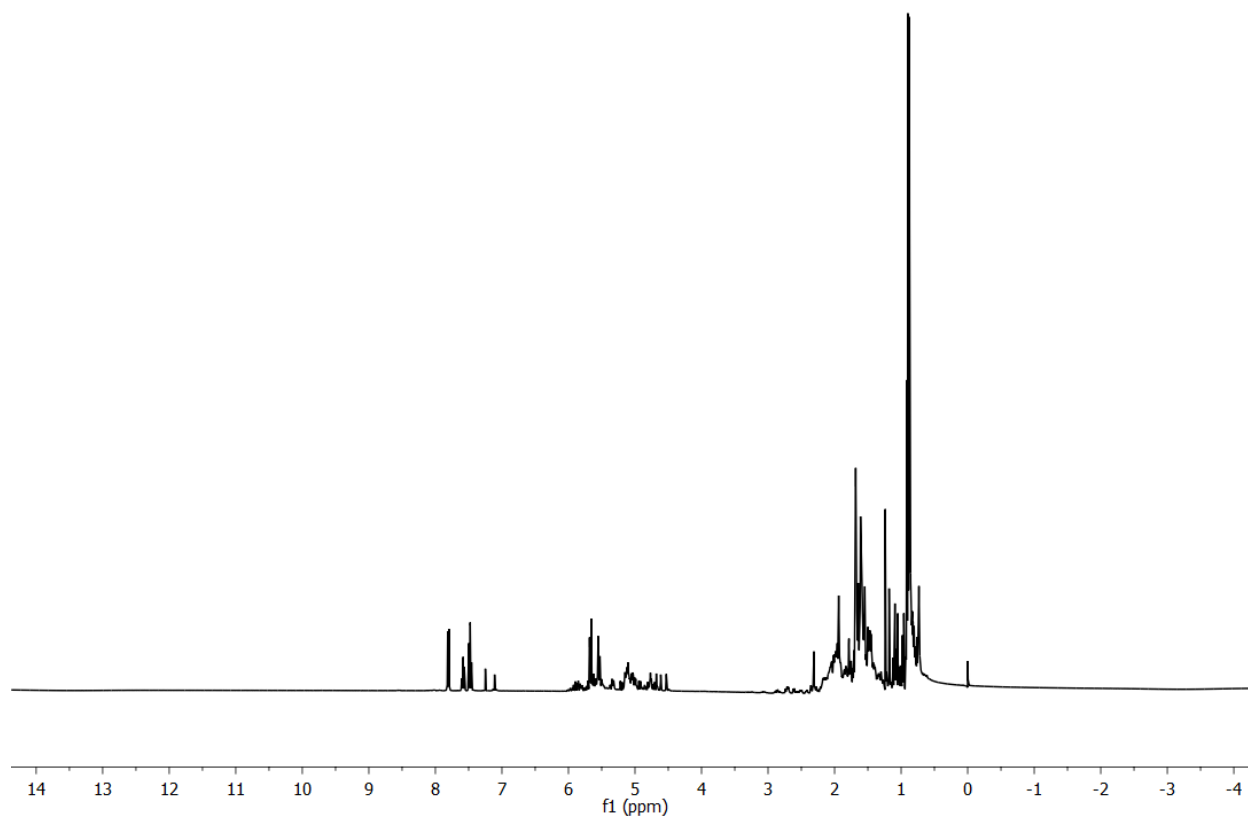

**Fig. S28** Cross-dimerization between  $\alpha$ -phellandrene **1** and myrcene **2** (coiled FEP tubing, 1:0.5 equivalent,  $\lambda = 365$  nm,  $t = 48$  h). **Top:** GC-MS trace of crude sample after irradiation. **Bottom:**  $^1\text{H}$  NMR spectrum of crude sample after irradiation. Signals between 7.5 and 8.0 ppm are related to benzophenone added to the NMR sample as external standard for qNMR.

LE-98-01-ST-quant-1  
single\_pulse

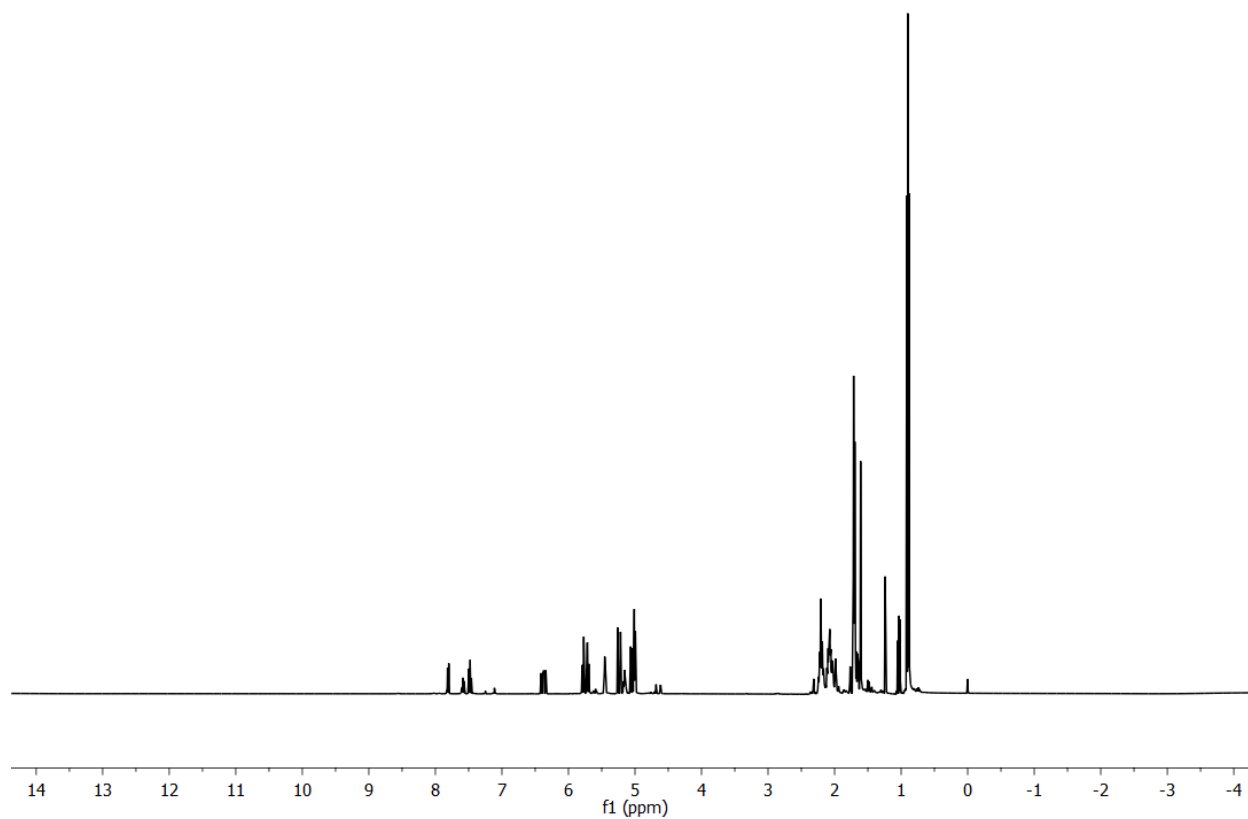

**Fig. S29** Cross-dimerization between  $\alpha$ -phellandrene **1** and myrcene **2** (coiled FEP tubing, 1:0.5 equivalent).  $^1\text{H}$  NMR spectrum of sample before irradiation. Signals between 7.5 and 8.0 ppm are related to benzophenone added to the NMR sample as external standard for qNMR.

LE-98-01-48h-dimers-C20-2  
single\_pulse

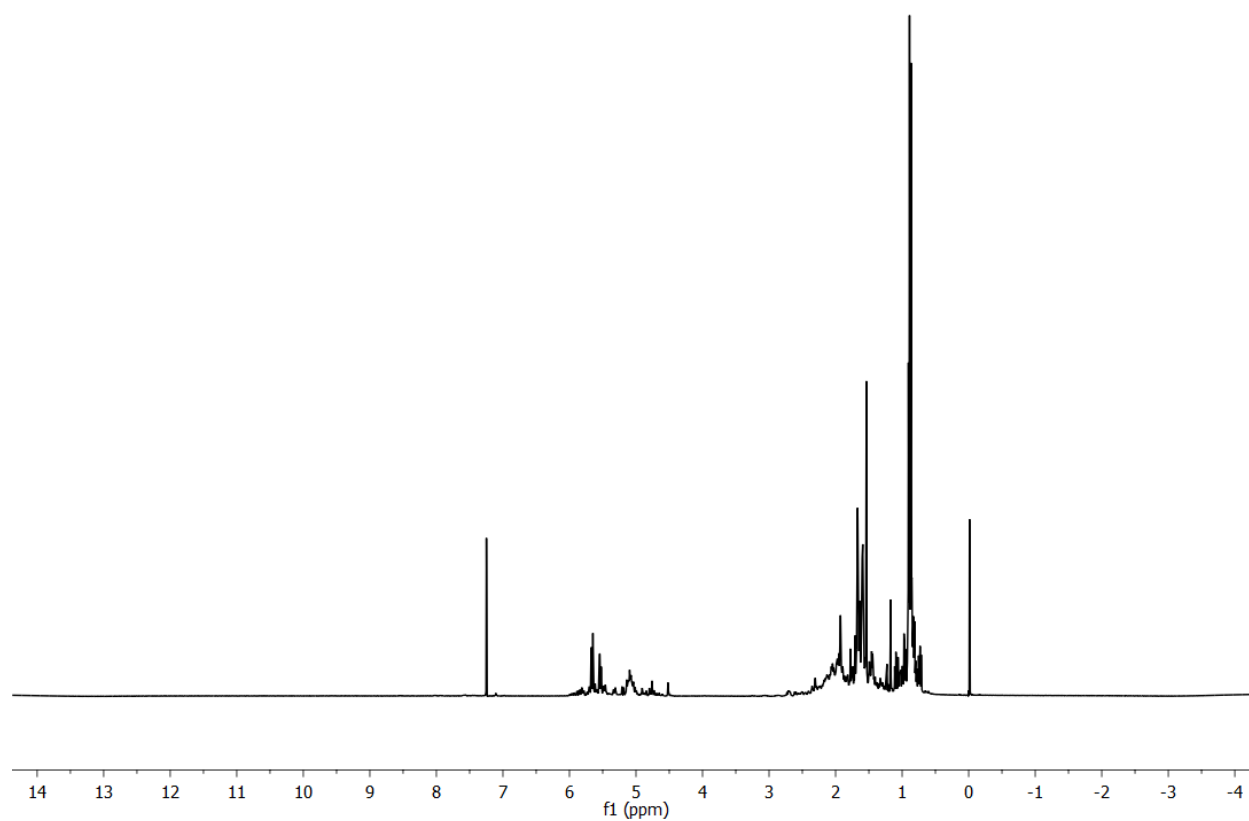

**Fig. S30** Cross-dimerization between  $\alpha$ -phellandrene **1** and myrcene **2** (coiled FEP tubing, 1:0.5 equivalent,  $\lambda = 365$  nm,  $t = 48$  h). <sup>1</sup>H NMR spectrum of dimers after C<sub>10</sub> fraction evaporation.

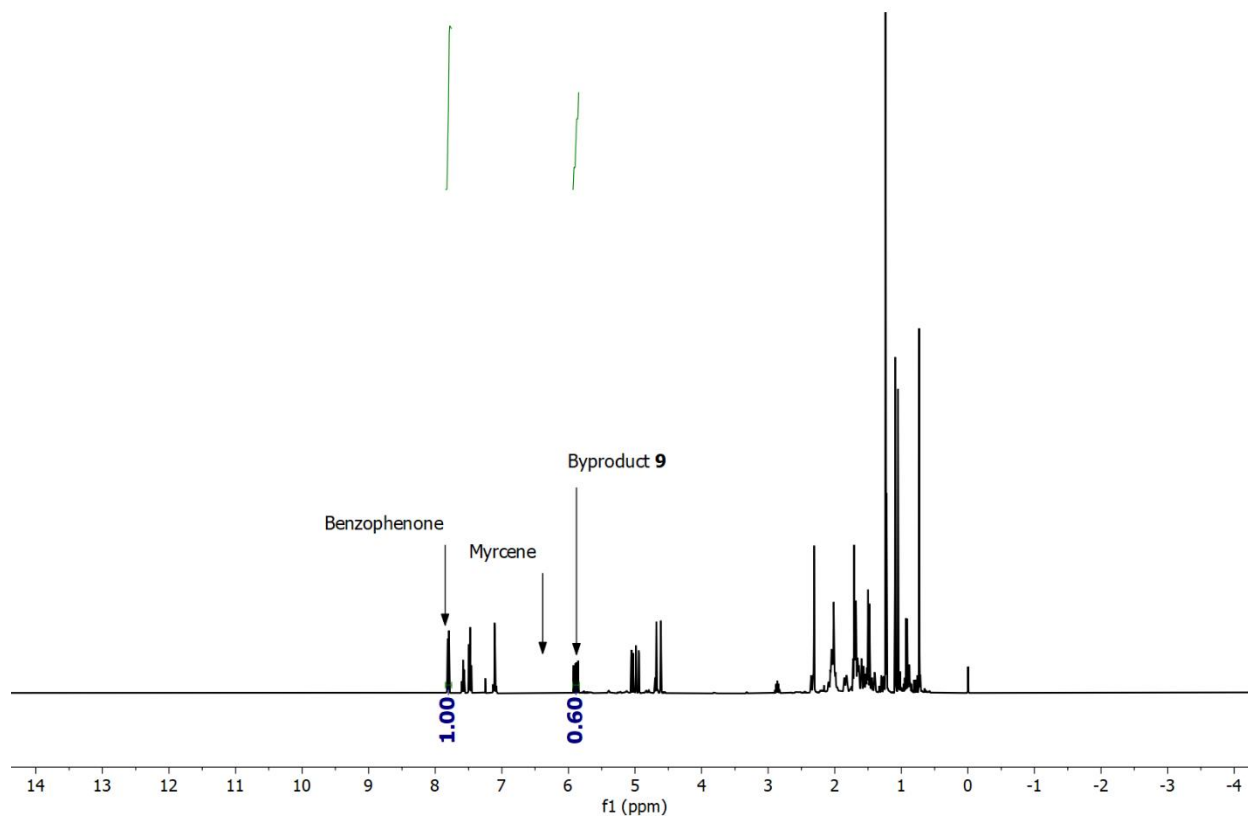

**Fig. S31** Cross-dimerization between  $\alpha$ -phellandrene **1** and myrcene **2** (coiled FEP tubing, 1:0.5, equivalent,  $\lambda = 365$  nm,  $t = 48$  h).  $^1\text{H}$  NMR spectrum of recovered  $\text{C}_{10}$  fraction after irradiation. Benzophenone (8.0 mg) was added to 52.6 mg of sample as external standard for qNMR.

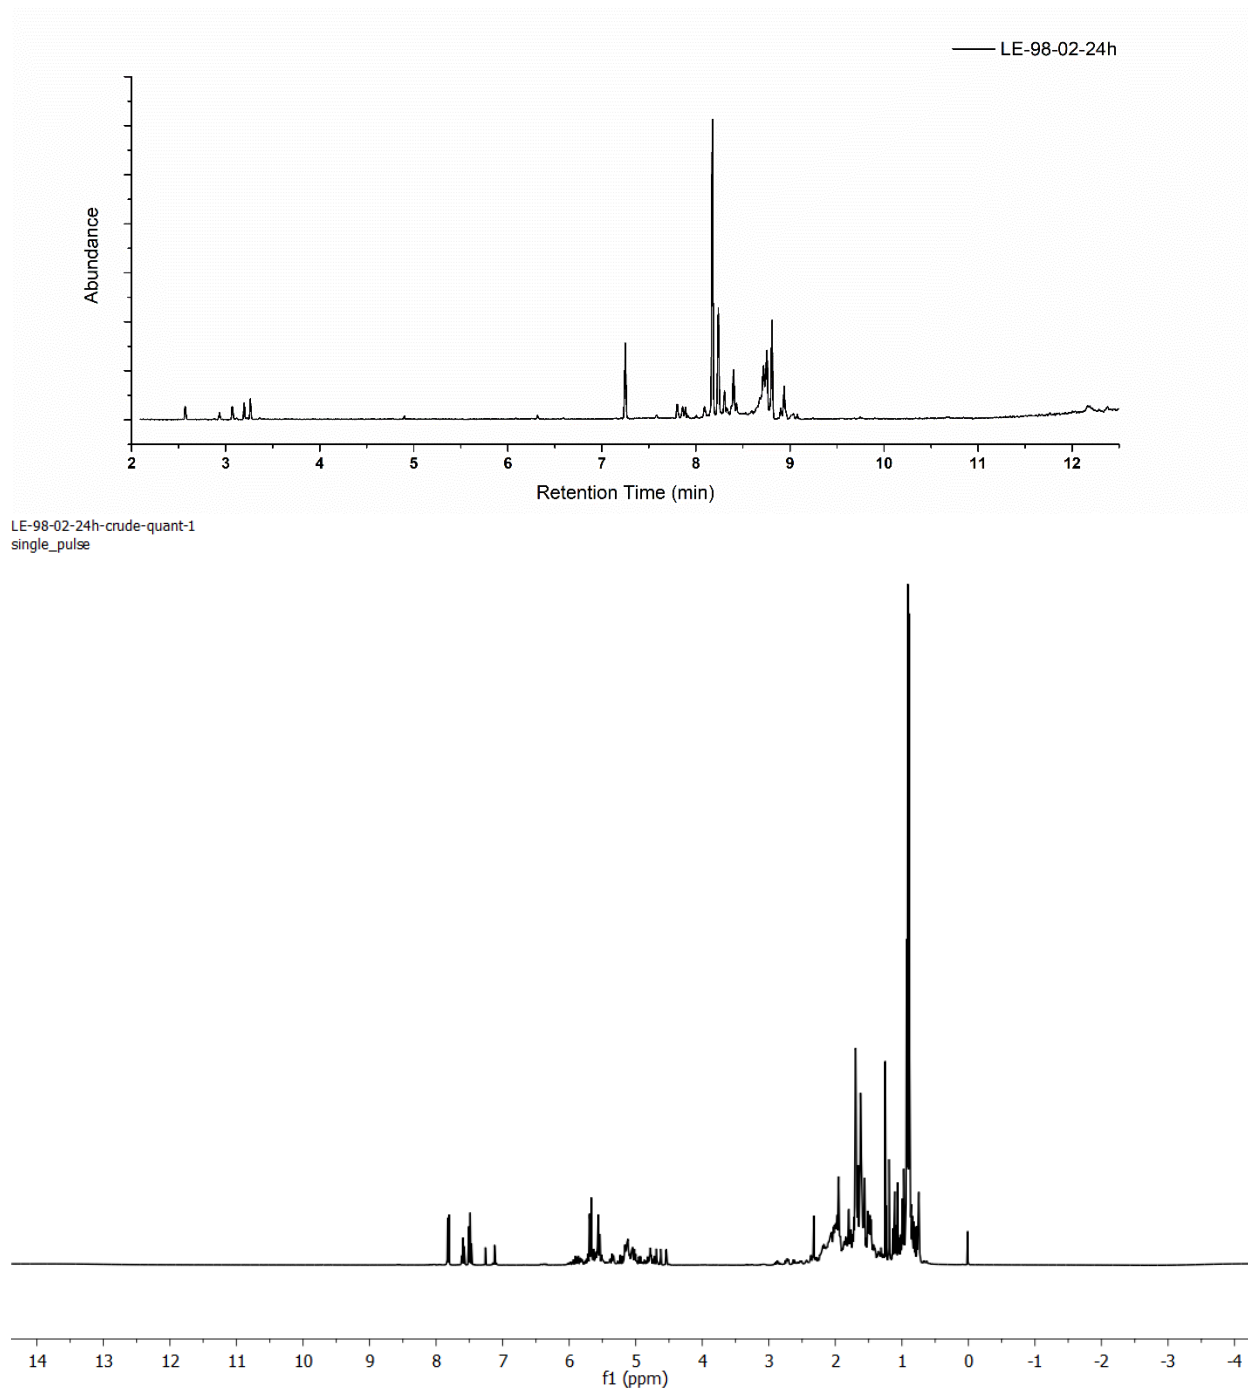

LE-98-02-24h-crude-quant-1  
single\_pulse

**Fig. S32** Cross-dimerization between  $\alpha$ -phellandrene **1** and myrcene **2** (coiled FEP tubing, 1:0.5, equivalent,  $\lambda = 365$  nm,  $t = 24$  h). **Top:** GC-MS trace of crude sample after irradiation. **Bottom:** <sup>1</sup>H NMR spectrum of crude sample after irradiation. Signals between 7.5 and 8.0 ppm are related to benzophenone added to the NMR as external standard for qNMR.

LE98-02-24h-dimers-1  
single\_pulse

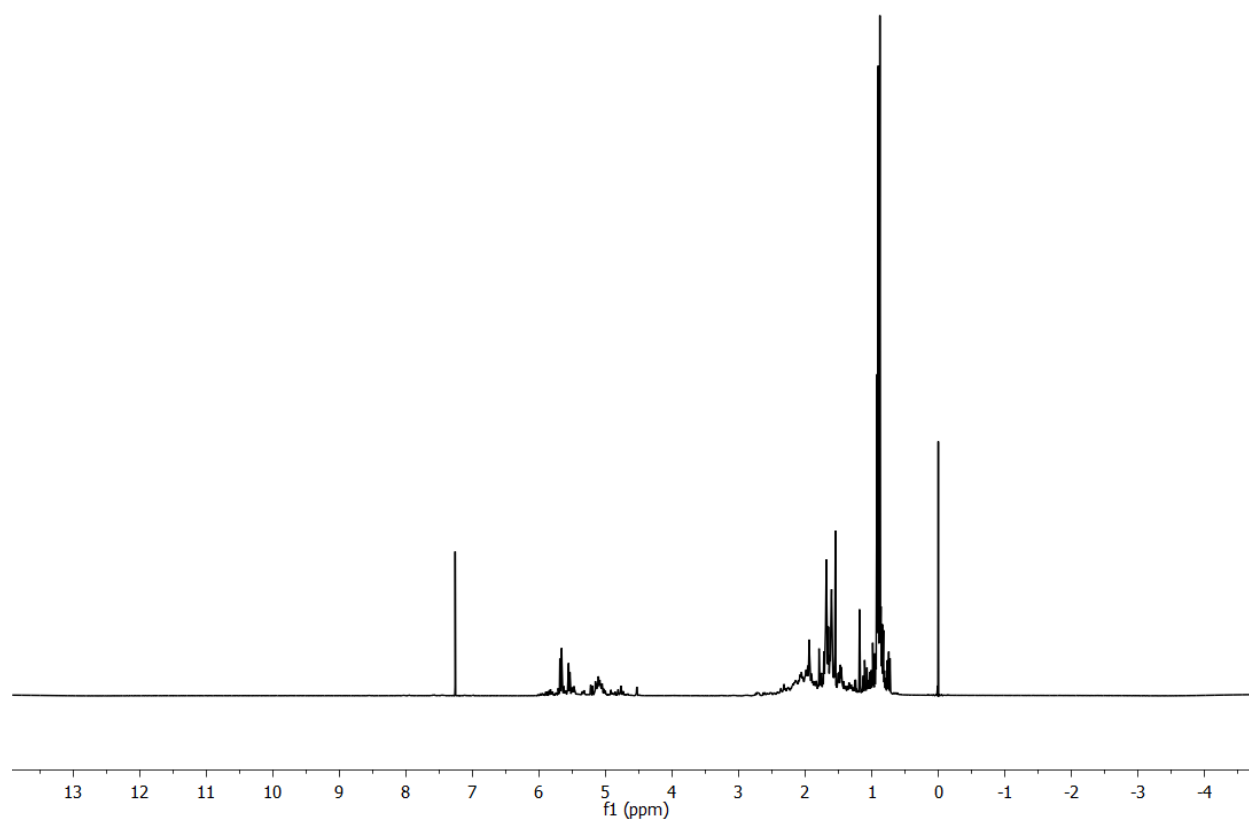

**Fig. S33** Cross-dimerization between  $\alpha$ -phellandrene **1** and myrcene **2** (coiled FEP tubing, 1:0.5, equivalent,  $\lambda = 365$  nm,  $t = 24$  h). <sup>1</sup>H NMR spectrum of dimers after C<sub>10</sub> fraction evaporation.

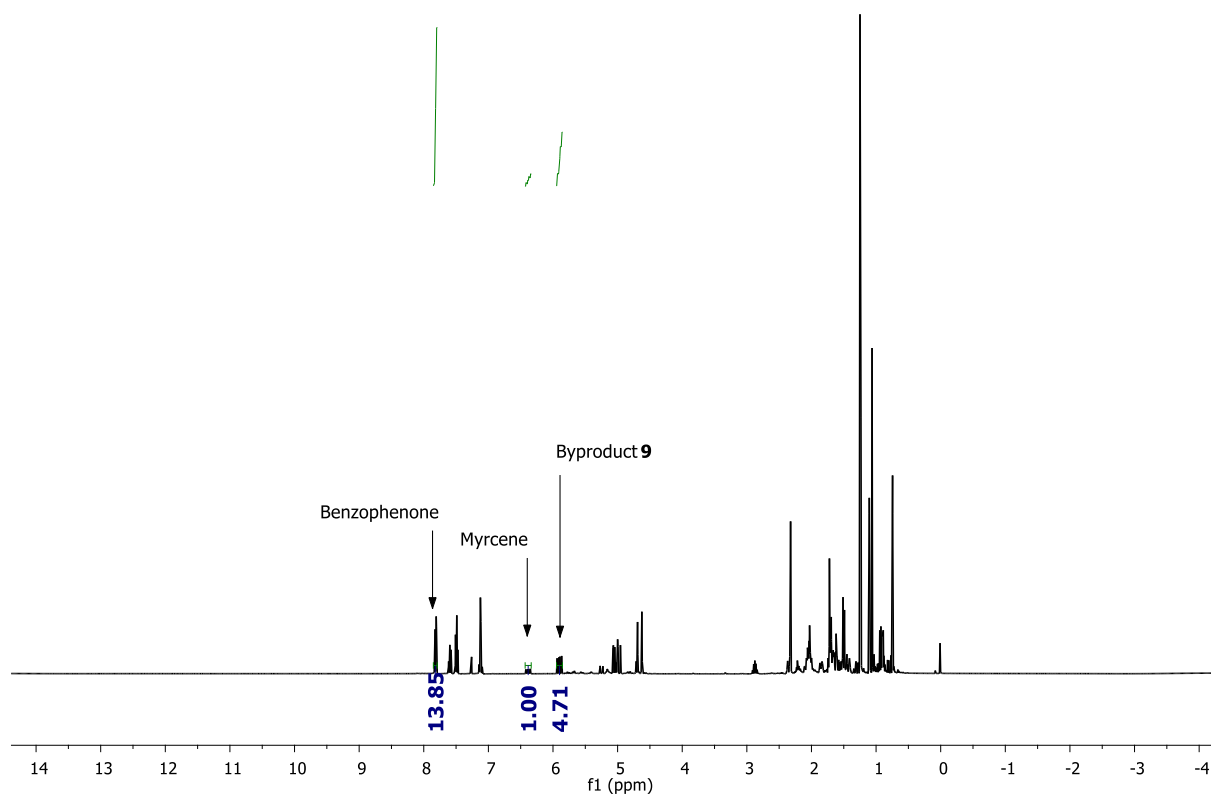

**Fig. S34** Cross-dimerization between  $\alpha$ -phellandrene **1** and myrcene **2** (coiled FEP tubing, 1:0.5, equivalent,  $\lambda = 365$  nm,  $t = 24$  h).  $^1\text{H}$  NMR spectrum of recovered  $\text{C}_{10}$  fraction after irradiation. Benzophenone (7.1 mg) was added to 45.1 mg of sample as external standard for qNMR.



## Ocimene and $\alpha$ -phellandrene

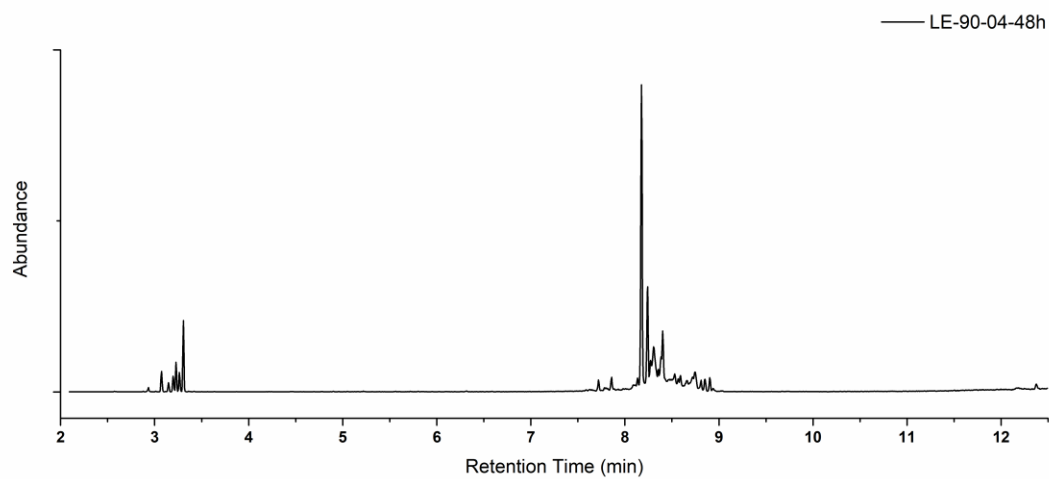

**Fig. S35** Cross-dimerization between  $\alpha$ -phellandrene **1** and ocimene **3** (coiled FEP tubing, 1:0.5, equivalent,  $\lambda = 365$  nm,  $t = 48$  h). GC-MS trace of crude sample after irradiation.

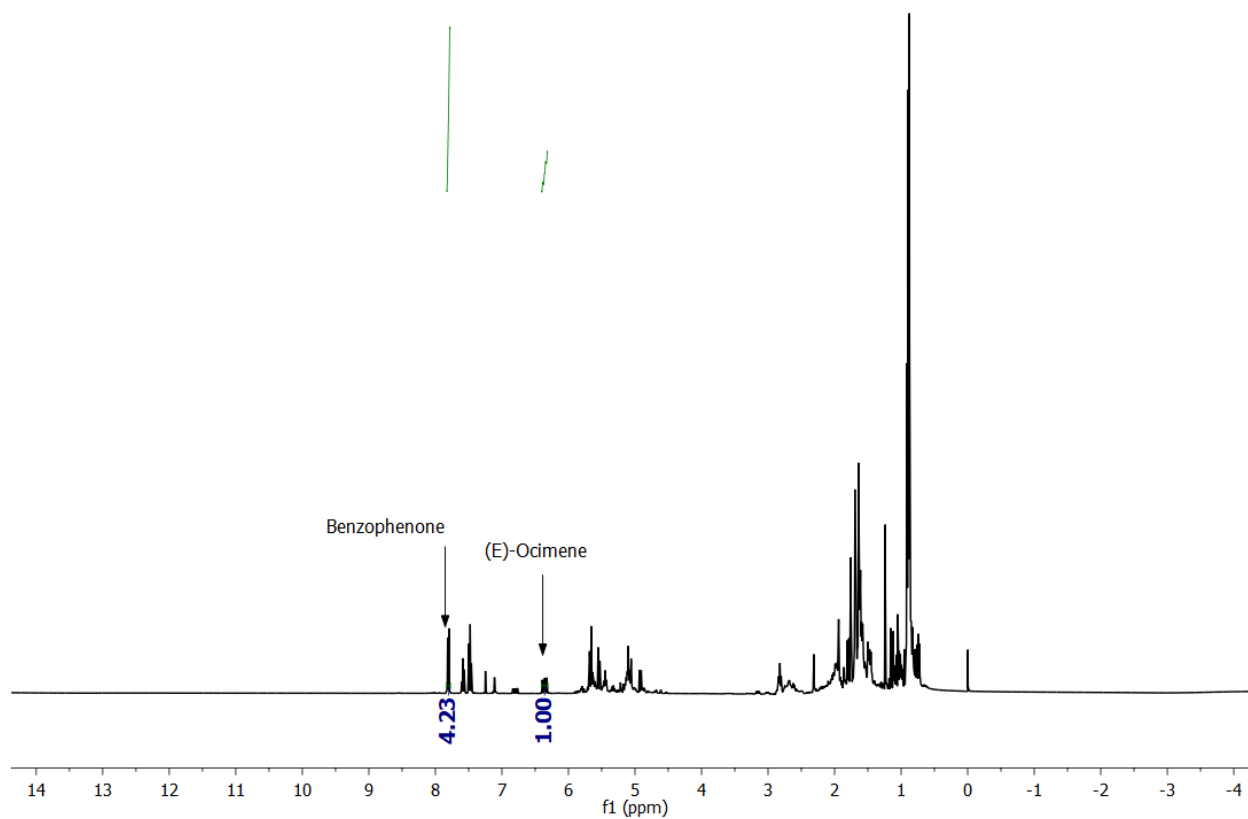

**Fig. S36** Cross-dimerization between  $\alpha$ -phellandrene **1** and ocimene **3** (coiled FEP tubing, 1:0.5 equivalent,  $\lambda = 365$  nm,  $t = 48$  h).  $^1\text{H}$  NMR spectrum of crude mixture after irradiation. Benzophenone (5.6 mg) was added to 64.4 mg of sample as external standard for qNMR.

LE-90-04-48h-dimers-2  
single\_pulse

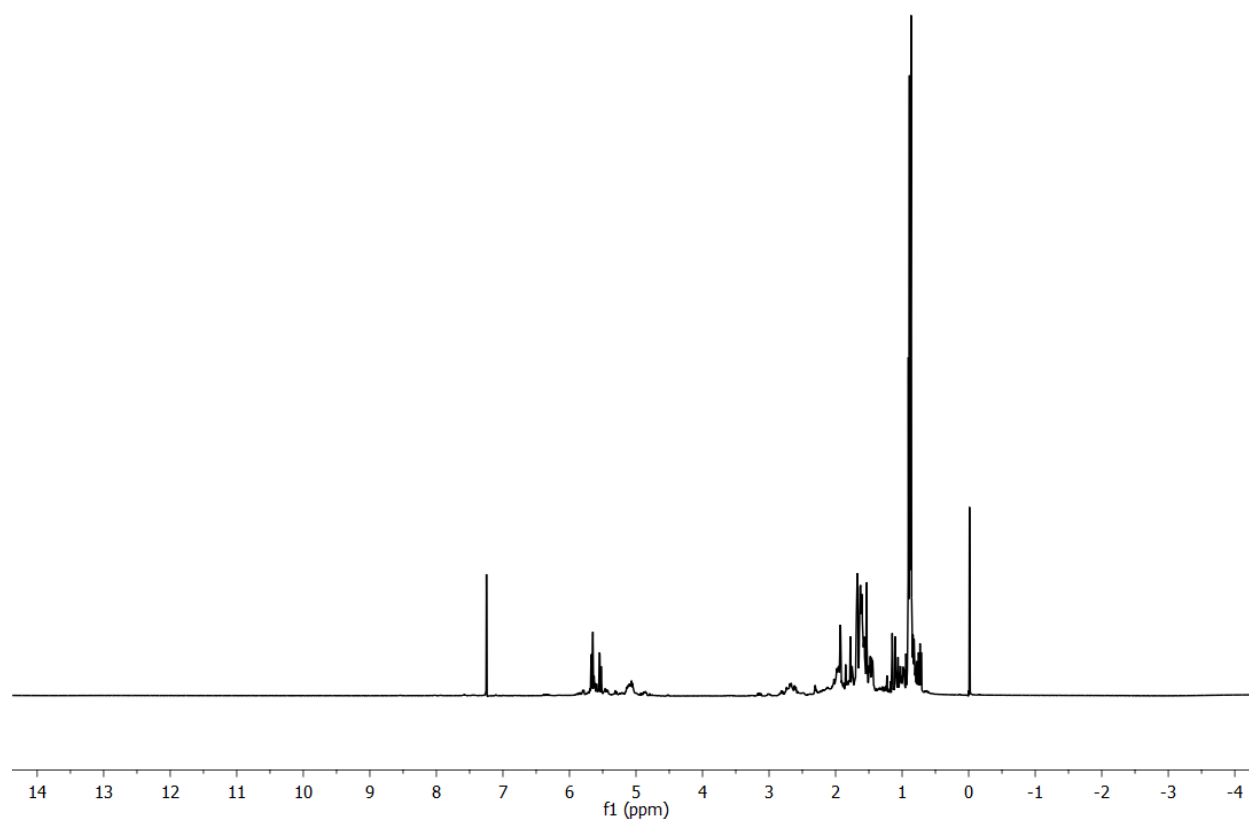

**Fig. S37** Cross-dimerization between  $\alpha$ -phellandrene and ocimene (coiled FEP tubing, 1:0.5, equivalent,  $\lambda = 365$  nm,  $t = 48$  h). <sup>1</sup>H NMR spectrum of dimers after C<sub>10</sub> fraction evaporation.

# Ginger oil

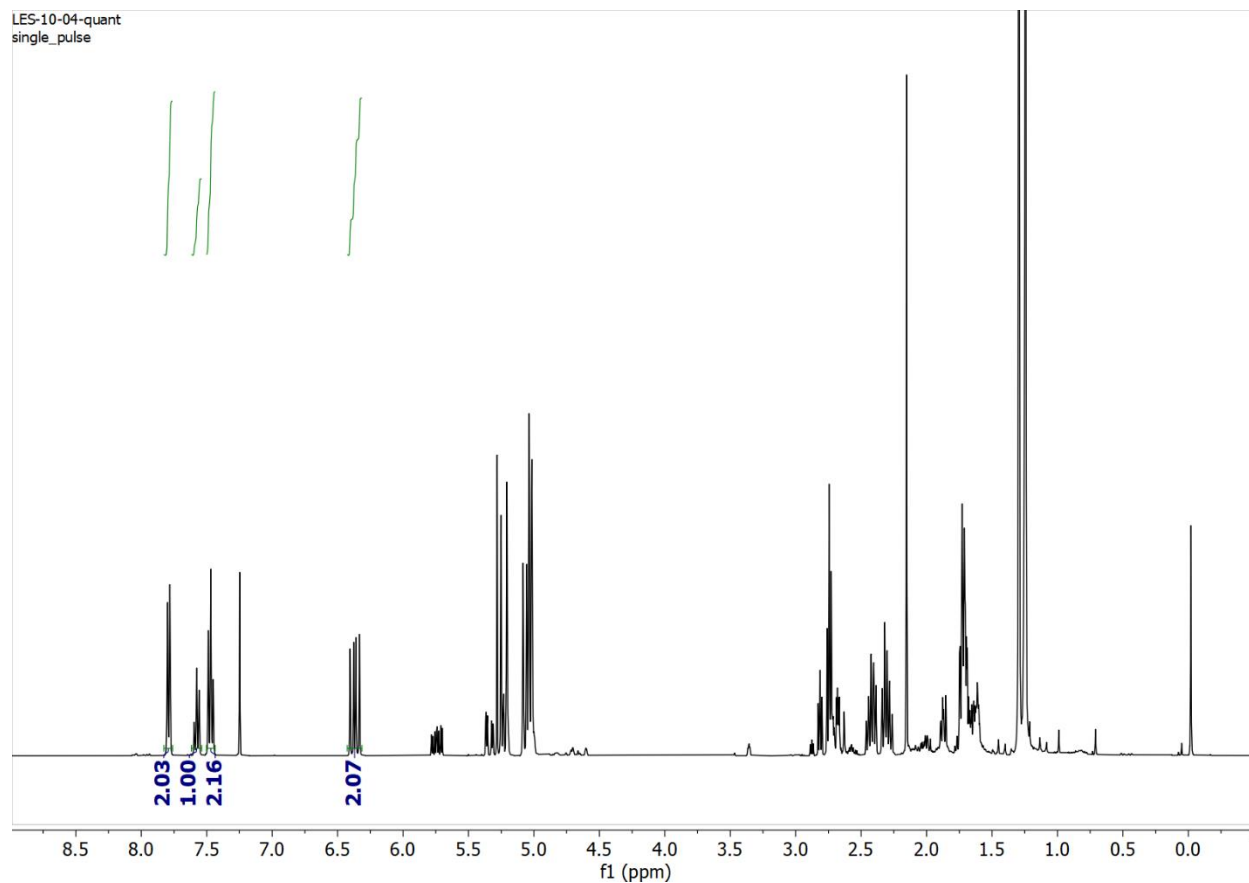

**Fig. S38** <sup>1</sup>H NMR spectra of starting material of ginger oil sample (C<sub>15</sub>-fraction), with internal standard for conjugated dienes quantification. Integrated peaks are for benzophenone (internal standard) and sesquiterpenes with conjugated diene moieties.

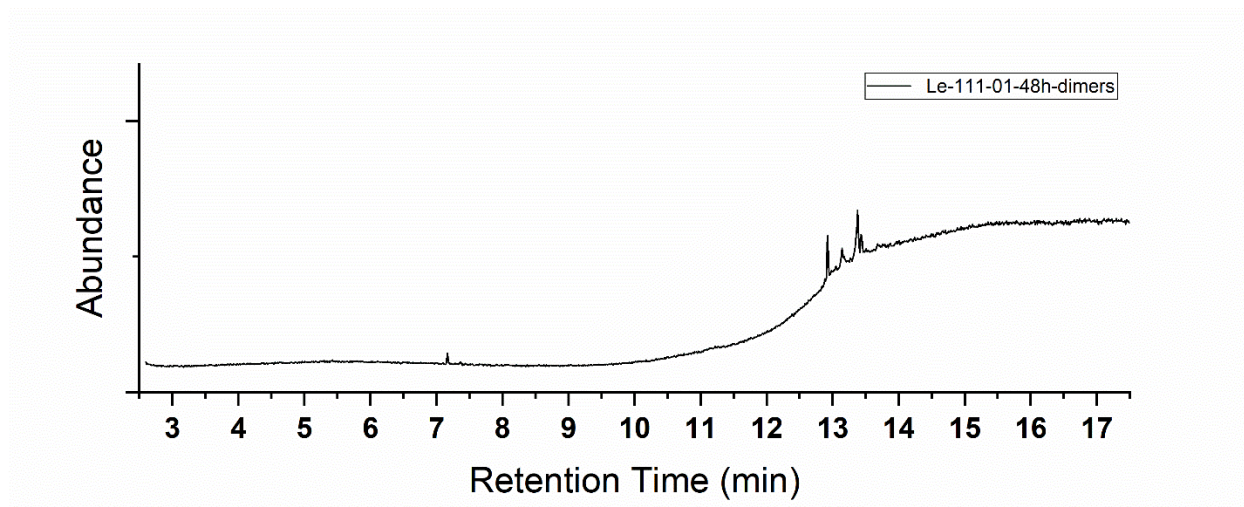

**Fig. S39** Photosensitized dimerization of sesquiterpenes in ginger oil ( $\lambda = 365$  nm,  $t = 48$  h). GC-MS trace of the  $C_{30}$  dimers in the sample after irradiation and after removing the unreacted starting material and the photosensitizer.



# Cartesian coordinates

## M06-2X/6-311+G(d,p)

### $\alpha$ -Phellandrene (1)

State: S<sub>0</sub>

Absolute Gibbs Free energy at 278 K: -390.386641 a.u.

|   |           |           |           |
|---|-----------|-----------|-----------|
| C | 0.789828  | -0.757748 | -0.122345 |
| C | 2.321126  | -0.708614 | -0.173063 |
| C | 2.846279  | 0.700024  | -0.053901 |
| C | 0.967829  | 1.217772  | 1.369586  |
| C | 0.303874  | 0.11424   | 1.014543  |
| H | 2.72859   | -1.314467 | 0.652577  |
| H | 2.679837  | -1.159488 | -1.09975  |
| H | 0.411589  | -0.315869 | -1.060718 |
| H | 0.596936  | 1.85302   | 2.168691  |
| H | -0.615091 | -0.151678 | 1.526518  |
| H | 3.7871    | 0.947068  | -0.536964 |
| C | 2.207816  | 1.616563  | 0.681896  |
| C | 2.702046  | 3.021379  | 0.877336  |
| H | 2.876973  | 3.223541  | 1.938366  |
| H | 3.633108  | 3.192529  | 0.335927  |
| H | 1.960406  | 3.745975  | 0.529123  |
| C | 0.228623  | -2.190653 | -0.031832 |
| H | 0.438639  | -2.562569 | 0.979568  |
| C | 0.891846  | -3.133933 | -1.037863 |
| H | 1.949637  | -3.291862 | -0.822339 |
| H | 0.40088   | -4.109784 | -1.026881 |
| H | 0.807636  | -2.729755 | -2.052535 |
| C | -1.286082 | -2.201236 | -0.253892 |
| H | -1.689658 | -3.207373 | -0.119208 |
| H | -1.817952 | -1.536787 | 0.428984  |
| H | -1.516332 | -1.882813 | -1.275636 |

### $\alpha$ -Phellandrene (1)

State: T<sub>1</sub>

Absolute Gibbs Free energy at 278 K: -390.307618 a.u.

|   |          |           |           |
|---|----------|-----------|-----------|
| C | 0.732769 | -0.751188 | -0.164303 |
| C | 2.279684 | -0.634744 | -0.300843 |
| C | 2.733496 | 0.77783   | -0.228202 |
| C | 0.943382 | 1.332025  | 1.309598  |
| C | 0.266533 | 0.110125  | 0.9641    |

|   |           |           |           |
|---|-----------|-----------|-----------|
| H | 2.71659   | -1.22057  | 0.523349  |
| H | 2.616486  | -1.095204 | -1.231138 |
| H | 0.317436  | -0.364491 | -1.110329 |
| H | 0.496452  | 1.97689   | 2.059951  |
| H | -0.583836 | -0.19992  | 1.557174  |
| H | 3.495744  | 1.148743  | -0.902737 |
| C | 2.119173  | 1.691214  | 0.735684  |
| C | 2.826548  | 2.975042  | 1.044061  |
| H | 2.267258  | 3.576608  | 1.761411  |
| H | 3.824365  | 2.78148   | 1.451078  |
| H | 2.965057  | 3.565071  | 0.131622  |
| C | 0.251009  | -2.208547 | -0.018942 |
| H | 0.54039   | -2.548767 | 0.984215  |
| C | 0.897166  | -3.137042 | -1.049857 |
| H | 1.97323   | -3.238429 | -0.900906 |
| H | 0.458614  | -4.135767 | -0.990243 |
| H | 0.727506  | -2.759338 | -2.063972 |
| C | -1.271981 | -2.295524 | -0.147898 |
| H | -1.614213 | -3.322564 | -0.000764 |
| H | -1.792463 | -1.664618 | 0.574062  |
| H | -1.580913 | -1.980831 | -1.149985 |

### Myrcene (2)

State: S<sub>0</sub>

Absolute Gibbs Free energy at 278 K: -390.359160 a.u.

|   |          |           |           |
|---|----------|-----------|-----------|
| C | 2.650312 | 3.073229  | -1.835955 |
| H | 1.728194 | 3.429569  | -1.391319 |
| H | 3.062191 | 3.663361  | -2.645189 |
| C | 3.26101  | 1.963661  | -1.418551 |
| H | 4.184289 | 1.65756   | -1.904381 |
| C | 2.799905 | 1.083453  | -0.331967 |
| C | 3.523318 | 0.002295  | -0.021522 |
| H | 3.229467 | -0.690976 | 0.756524  |
| H | 4.437225 | -0.220505 | -0.561491 |
| C | 1.526653 | 1.469965  | 0.382588  |
| H | 1.668464 | 2.470139  | 0.806606  |
| H | 0.729024 | 1.573165  | -0.363638 |
| C | 1.061333 | 0.513153  | 1.47834   |
| H | 0.22949  | 0.985703  | 2.011858  |

|   |           |           |           |
|---|-----------|-----------|-----------|
| H | 1.86157   | 0.38823   | 2.215658  |
| C | 0.617617  | -0.826444 | 0.936112  |
| H | 0.562229  | -0.903194 | -0.148713 |
| C | 0.288948  | -1.898191 | 1.658817  |
| C | 0.323255  | -1.922721 | 3.163138  |
| H | 0.626976  | -0.969309 | 3.594046  |
| H | -0.665056 | -2.176237 | 3.559924  |
| H | 1.012373  | -2.696258 | 3.517546  |
| C | -0.14966  | -3.184021 | 1.012023  |
| H | -1.157786 | -3.457843 | 1.339371  |
| H | -0.149064 | -3.107067 | -0.075779 |
| H | 0.512051  | -4.007023 | 1.300872  |

**Myrcene (2)**

State: T<sub>1</sub>

Absolute Gibbs Free energy at 278 K: -390.276146 a.u.

|   |           |           |           |
|---|-----------|-----------|-----------|
| C | 2.382087  | 2.120228  | -2.213872 |
| H | 1.588842  | 2.777967  | -1.884125 |
| H | 2.697948  | 2.21067   | -3.244328 |
| C | 2.983188  | 1.207417  | -1.38089  |
| H | 3.78439   | 0.603759  | -1.801081 |
| C | 2.685256  | 0.970971  | -0.033018 |
| C | 3.49118   | 0.00024   | 0.721471  |
| H | 4.373254  | 0.312342  | 1.270941  |
| H | 3.215865  | -1.047575 | 0.756026  |
| C | 1.606876  | 1.73224   | 0.697289  |
| H | 2.052978  | 2.609726  | 1.185513  |
| H | 0.876147  | 2.115107  | -0.020021 |
| C | 0.871341  | 0.892699  | 1.755744  |
| H | 0.1117    | 1.52834   | 2.223833  |
| H | 1.567196  | 0.603843  | 2.544508  |
| C | 0.206366  | -0.305854 | 1.141016  |
| H | -0.461356 | -0.073854 | 0.31118   |
| C | 0.346997  | -1.592147 | 1.470588  |
| C | 1.222619  | -2.10905  | 2.581192  |
| H | 1.823048  | -1.335287 | 3.056328  |
| H | 0.609277  | -2.58789  | 3.351394  |
| H | 1.900394  | -2.879242 | 2.198214  |
| C | -0.399336 | -2.668463 | 0.726375  |
| H | -1.027664 | -3.246916 | 1.411304  |
| H | -1.034134 | -2.25195  | -0.056197 |
| H | 0.299868  | -3.373626 | 0.265536  |

**(E)-Ocimene (3)**

State: S<sub>0</sub>

Absolute Gibbs Free energy at 278 K: -390.359441 a.u.

|   |          |          |           |
|---|----------|----------|-----------|
| C | 2.370704 | 0.926642 | -2.709903 |
|---|----------|----------|-----------|

|   |           |           |           |
|---|-----------|-----------|-----------|
| H | 1.571661  | 0.222341  | -2.503841 |
| H | 2.428644  | 1.339391  | -3.709851 |
| C | 3.253841  | 1.260788  | -1.77119  |
| H | 4.074856  | 1.926884  | -2.032767 |
| C | 3.246195  | 0.762593  | -0.37783  |
| C | 2.093324  | 0.650633  | 0.293196  |
| H | 1.184088  | 0.960864  | -0.217914 |
| C | 1.874079  | 0.107234  | 1.680541  |
| H | 1.322436  | 0.841306  | 2.271716  |
| H | 2.824139  | -0.055478 | 2.192401  |
| C | 1.121916  | -1.199154 | 1.613437  |
| H | 1.710156  | -2.039154 | 1.248475  |
| C | -0.16328  | -1.418666 | 1.900547  |
| C | -1.131235 | -0.370322 | 2.380015  |
| H | -0.700185 | 0.627857  | 2.429641  |
| H | -1.997912 | -0.33101  | 1.712773  |
| H | -1.510684 | -0.630707 | 3.373298  |
| C | -0.765545 | -2.791546 | 1.754867  |
| H | -1.59268  | -2.775445 | 1.038004  |
| H | -0.029498 | -3.521396 | 1.416538  |
| H | -1.179215 | -3.133652 | 2.708937  |
| C | 4.61074   | 0.431115  | 0.169824  |
| H | 4.588801  | 0.114343  | 1.21054   |
| H | 5.072322  | -0.364685 | -0.421776 |
| H | 5.265857  | 1.304339  | 0.094581  |

**(E)-Ocimene (3) - internal twisted - most stable**

State: T<sub>1</sub>

Absolute Gibbs Free energy at 278 K: -390.283875 a.u.

|   |           |           |           |
|---|-----------|-----------|-----------|
| C | 1.529565  | 1.752837  | -1.528221 |
| H | 0.7896    | 1.031291  | -1.203826 |
| H | 1.190808  | 2.597929  | -2.111785 |
| C | 2.864346  | 1.5875    | -1.228607 |
| H | 3.565155  | 2.328439  | -1.607128 |
| C | 3.39915   | 0.539772  | -0.480225 |
| C | 2.539853  | -0.489296 | 0.125293  |
| H | 2.380709  | -1.432911 | -0.389379 |
| C | 2.152246  | -0.388296 | 1.574555  |
| H | 1.760132  | 0.618953  | 1.763463  |
| H | 3.05262   | -0.464263 | 2.201694  |
| C | 1.166265  | -1.446613 | 2.00105   |
| H | 1.582167  | -2.326184 | 2.486707  |
| C | -0.151223 | -1.409049 | 1.792547  |
| C | -0.855052 | -0.270817 | 1.104445  |
| H | -0.200261 | 0.577645  | 0.909422  |
| H | -1.264833 | -0.608517 | 0.14639   |
| H | -1.701032 | 0.074452  | 1.706539  |
| C | -1.04838  | -2.53725  | 2.224725  |



|   |           |           |           |
|---|-----------|-----------|-----------|
| H | -1.594776 | -2.944267 | 1.36797   |
| H | -0.483788 | -3.345792 | 2.690292  |
| H | -1.797572 | -2.181595 | 2.939094  |
| C | 4.877644  | 0.426379  | -0.237378 |
| H | 5.09962   | 0.419523  | 0.835561  |
| H | 5.264665  | -0.515413 | -0.642182 |
| H | 5.425896  | 1.250658  | -0.696756 |

**(E)-Ocimene (3)- terminal twisted - less stable**

State: T<sub>1</sub>

Absolute Gibbs Free energy at 278 K: -390.278587 a.u.

|   |           |           |           |
|---|-----------|-----------|-----------|
| C | 3.668424  | -0.932917 | -2.396171 |
| H | 2.82325   | -1.273364 | -2.984005 |
| H | 4.579957  | -1.517747 | -2.449681 |
| C | 3.623723  | 0.335497  | -1.668876 |
| H | 3.918444  | 1.23422   | -2.209564 |
| C | 3.233183  | 0.476326  | -0.342375 |
| C | 2.843404  | -0.62299  | 0.41761   |
| H | 2.857059  | -1.602084 | -0.052343 |
| C | 2.407583  | -0.575728 | 1.85299   |
| H | 2.138354  | 0.446169  | 2.135232  |
| H | 3.25153   | -0.84895  | 2.499165  |
| C | 1.256667  | -1.517566 | 2.141806  |
| H | 1.483331  | -2.402307 | 2.73117   |
| C | 0.005221  | -1.352308 | 1.709551  |
| C | -0.435448 | -0.181471 | 0.873321  |
| H | 0.362227  | 0.54052   | 0.702002  |
| H | -0.786103 | -0.528447 | -0.104065 |
| H | -1.277374 | 0.33038   | 1.350092  |
| C | -1.077126 | -2.348091 | 2.027039  |
| H | -1.510438 | -2.751895 | 1.106479  |
| H | -0.698294 | -3.178557 | 2.623764  |
| H | -1.892435 | -1.868837 | 2.578171  |
| C | 3.236448  | 1.858711  | 0.272939  |
| H | 2.230561  | 2.159747  | 0.5799    |
| H | 3.873179  | 1.896645  | 1.159936  |
| H | 3.603096  | 2.59802   | -0.439374 |

**(Z)-Ocimene (3)**

State: S<sub>0</sub>

Absolute Gibbs Free energy at 278 K: -390.359421 a.u.

|   |          |           |           |
|---|----------|-----------|-----------|
| C | 4.710119 | -0.422269 | 1.23214   |
| H | 4.027344 | -1.242692 | 1.424691  |
| H | 5.67438  | -0.450317 | 1.725697  |
| C | 4.385175 | 0.568931  | 0.405122  |
| H | 5.124495 | 1.342072  | 0.199054  |
| C | 3.113535 | 0.692358  | -0.338505 |

|   |           |           |           |
|---|-----------|-----------|-----------|
| C | 1.900816  | 0.572912  | 0.215098  |
| H | 1.038386  | 0.671028  | -0.442628 |
| C | 1.560817  | 0.320178  | 1.660531  |
| H | 0.829101  | 1.064265  | 1.983155  |
| H | 2.448271  | 0.452029  | 2.282571  |
| C | 1.012944  | -1.071894 | 1.854326  |
| H | 1.757726  | -1.865299 | 1.820016  |
| C | -0.262191 | -1.432606 | 2.017011  |
| C | -1.428494 | -0.481416 | 2.050037  |
| H | -1.147149 | 0.555093  | 1.873019  |
| H | -2.16289  | -0.766473 | 1.290192  |
| H | -1.938266 | -0.538921 | 3.017141  |
| C | -0.644064 | -2.880302 | 2.181349  |
| H | -1.326614 | -3.192225 | 1.384383  |
| H | 0.229351  | -3.532865 | 2.162563  |
| H | -1.170691 | -3.034421 | 3.128658  |
| C | 3.279364  | 1.004674  | -1.805242 |
| H | 2.3138    | 1.114292  | -2.299824 |
| H | 3.843033  | 1.933299  | -1.938834 |
| H | 3.841942  | 0.21289   | -2.307802 |

**(Z)-Ocimene (3) - internal twisted - most stable**

State: T<sub>1</sub>

Absolute Gibbs Free energy at 278 K: -390.283664 a.u.

|   |           |           |           |
|---|-----------|-----------|-----------|
| C | 5.277577  | -0.615592 | 0.31377   |
| H | 4.786687  | -1.424536 | 0.841925  |
| H | 6.358279  | -0.619416 | 0.277598  |
| C | 4.548941  | 0.378236  | -0.302041 |
| H | 5.094947  | 1.156951  | -0.83013  |
| C | 3.15722   | 0.467434  | -0.306377 |
| C | 2.322779  | -0.506575 | 0.41203   |
| H | 1.941728  | -1.387721 | -0.094923 |
| C | 1.987127  | -0.292845 | 1.860897  |
| H | 1.62508   | 0.736818  | 1.995689  |
| H | 2.910169  | -0.340692 | 2.454291  |
| C | 0.982725  | -1.28006  | 2.40277   |
| H | 1.365498  | -2.052831 | 3.06447   |
| C | -0.318897 | -1.290706 | 2.108881  |
| C | -0.971987 | -0.289291 | 1.194293  |
| H | -0.27596  | 0.46198   | 0.822091  |
| H | -1.410039 | -0.799131 | 0.330019  |
| H | -1.792639 | 0.21867   | 1.710841  |
| C | -1.248245 | -2.32853  | 2.677483  |
| H | -1.732723 | -2.89388  | 1.875096  |
| H | -0.720738 | -3.030183 | 3.324495  |
| H | -2.045933 | -1.854575 | 3.258244  |
| C | 2.442504  | 1.580292  | -1.017725 |
| H | 1.774386  | 1.179767  | -1.788301 |

|   |         |          |           |
|---|---------|----------|-----------|
| H | 1.81141 | 2.144779 | -0.321402 |
| H | 3.14035 | 2.273958 | -1.49007  |

**(Z)-Ocimene (3) - terminal twisted - less stable**

State: T<sub>1</sub>

Absolute Gibbs Free energy at 278 K: -390.278340 a.u.

|   |           |           |           |
|---|-----------|-----------|-----------|
| C | 3.122931  | -0.978967 | -2.338035 |
| H | 2.208435  | -1.249653 | -2.853976 |
| H | 3.983388  | -1.623694 | -2.478456 |
| C | 3.229439  | 0.275342  | -1.592986 |
| H | 3.53867   | 1.162002  | -2.145334 |
| C | 2.96458   | 0.417099  | -0.235902 |
| C | 2.565315  | -0.667482 | 0.540173  |
| H | 2.470794  | -1.635896 | 0.057552  |
| C | 2.257052  | -0.618751 | 2.008196  |
| H | 2.087117  | 0.413565  | 2.327239  |
| H | 3.130573  | -0.964293 | 2.575607  |
| C | 1.069653  | -1.482616 | 2.381169  |
| H | 1.281106  | -2.393216 | 2.935797  |
| C | -0.198793 | -1.220341 | 2.060892  |
| C | -0.623251 | -0.004357 | 1.282744  |
| H | 0.206908  | 0.663024  | 1.054041  |
| H | -1.07947  | -0.305567 | 0.334179  |
| H | -1.382753 | 0.555619  | 1.837479  |
| C | -1.319306 | -2.143562 | 2.455782  |
| H | -1.856451 | -2.497308 | 1.57001   |
| H | -0.952282 | -3.010434 | 3.006303  |
| H | -2.048828 | -1.619263 | 3.081123  |
| C | 3.116795  | 1.784041  | 0.394912  |
| H | 2.164651  | 2.14633   | 0.793387  |
| H | 3.829564  | 1.762018  | 1.222646  |
| H | 3.46993   | 2.510406  | -0.337269 |

**$\alpha$ -Terpinene (5)**

State: S<sub>0</sub>

Absolute Gibbs Free energy at 278 K: -390.392301 a.u.

|   |          |           |           |
|---|----------|-----------|-----------|
| C | 0.864082 | -0.89338  | 0.282909  |
| C | 2.070394 | -0.6142   | -0.230391 |
| C | 2.629621 | 0.741584  | -0.174658 |
| H | 2.659856 | -1.384276 | -0.715089 |
| H | 3.48899  | 0.971894  | -0.796928 |
| C | 2.131431 | 1.668488  | 0.652781  |
| C | 2.704911 | 3.043808  | 0.806843  |
| H | 3.002146 | 3.219329  | 1.846608  |
| H | 3.57775  | 3.188852  | 0.168843  |
| H | 1.9613   | 3.80729   | 0.557656  |
| C | 0.192713 | -2.244937 | 0.225329  |

|   |           |           |           |
|---|-----------|-----------|-----------|
| H | -0.086726 | -2.50424  | 1.255913  |
| C | 1.083252  | -3.358454 | -0.317597 |
| H | 2.008933  | -3.447312 | 0.254838  |
| H | 0.55933   | -4.315566 | -0.270445 |
| H | 1.343284  | -3.172986 | -1.363694 |
| C | -1.105028 | -2.156181 | -0.593397 |
| H | -1.622474 | -3.118438 | -0.597631 |
| H | -1.790565 | -1.40739  | -0.191567 |
| H | -0.874768 | -1.885499 | -1.627792 |
| C | 0.072322  | 0.246     | 0.89013   |
| H | -0.654069 | -0.137805 | 1.61262   |
| H | -0.505583 | 0.730358  | 0.090037  |
| C | 0.980187  | 1.280485  | 1.551721  |
| H | 0.402524  | 2.164938  | 1.834441  |
| H | 1.399007  | 0.868509  | 2.481659  |

**$\alpha$ -Terpinene (5)**

State: T<sub>1</sub>

Absolute Gibbs Free energy at 278 K: -390.313700 a.u.

|   |           |           |           |
|---|-----------|-----------|-----------|
| C | 0.760601  | -0.838748 | 0.25536   |
| C | 1.963327  | -0.484622 | -0.498041 |
| C | 2.588238  | 0.699496  | -0.288378 |
| H | 2.355314  | -1.174545 | -1.236621 |
| H | 3.46275   | 0.959764  | -0.876517 |
| C | 2.131947  | 1.645579  | 0.703664  |
| C | 2.793299  | 2.968108  | 0.888383  |
| H | 3.17579   | 3.086563  | 1.910464  |
| H | 3.628838  | 3.102995  | 0.199491  |
| H | 2.084309  | 3.791305  | 0.729429  |
| C | 0.155928  | -2.211321 | 0.243871  |
| H | -0.204334 | -2.412631 | 1.263108  |
| C | 1.14354   | -3.316286 | -0.134334 |
| H | 2.051232  | -3.263855 | 0.470771  |
| H | 0.686798  | -4.297419 | 0.013338  |
| H | 1.431353  | -3.24479  | -1.18665  |
| C | -1.074327 | -2.254755 | -0.683991 |
| H | -1.545791 | -3.241055 | -0.656851 |
| H | -1.819019 | -1.51163  | -0.390524 |
| H | -0.774028 | -2.045869 | -1.714866 |
| C | 0.016682  | 0.284691  | 0.897161  |
| H | -0.707574 | -0.100165 | 1.622047  |
| H | -0.559961 | 0.836698  | 0.139549  |
| C | 0.975633  | 1.287144  | 1.578465  |
| H | 0.433688  | 2.193657  | 1.873269  |
| H | 1.33859   | 0.832563  | 2.511541  |

**$\alpha$ -Zingiberene (6)**State: S<sub>0</sub>

Absolute Gibbs Free energy at 278 K: -585.572095 a.u.

|   |           |           |           |
|---|-----------|-----------|-----------|
| C | -6.54619  | 3.034734  | 0.397559  |
| C | -5.543545 | 3.663757  | -0.479271 |
| C | -4.928378 | 4.795085  | -0.123878 |
| C | -5.225559 | 5.461015  | 1.20176   |
| C | -6.695419 | 5.219246  | 1.56115   |
| C | -7.089719 | 3.775998  | 1.369545  |
| H | -4.186111 | 5.238864  | -0.780136 |
| H | -5.307559 | 3.177923  | -1.421552 |
| H | -4.609551 | 4.961125  | 1.969564  |
| H | -6.885398 | 5.52176   | 2.592215  |
| H | -7.331857 | 5.852825  | 0.922159  |
| H | -7.865319 | 3.358868  | 2.005101  |
| C | -6.925873 | 1.607345  | 0.12529   |
| H | -7.688513 | 1.260365  | 0.823365  |
| H | -7.313724 | 1.499524  | -0.892178 |
| H | -6.054894 | 0.951047  | 0.209224  |
| C | -4.827464 | 6.950748  | 1.190943  |
| H | -5.252555 | 7.397593  | 0.2812    |
| C | -5.38505  | 7.700963  | 2.403617  |
| H | -4.995719 | 8.720164  | 2.4492    |
| H | -6.473825 | 7.76905   | 2.380837  |
| H | -5.095517 | 7.191015  | 3.328832  |
| C | -3.299279 | 7.099641  | 1.14023   |
| H | -2.854034 | 6.323242  | 0.510225  |
| H | -2.895999 | 6.933378  | 2.147208  |
| C | -2.822517 | 8.46657   | 0.627984  |
| H | -3.281799 | 9.267755  | 1.212464  |
| H | -3.176123 | 8.598555  | -0.399223 |
| C | -1.321488 | 8.591467  | 0.658347  |
| H | -0.796918 | 8.323043  | -0.256385 |
| C | -0.586554 | 8.954991  | 1.711802  |
| C | -1.168433 | 9.321888  | 3.051178  |
| H | -0.899421 | 0.349429  | 3.316658  |
| H | -2.253767 | 9.230731  | 3.085019  |
| H | -0.751197 | 8.675862  | 3.83028   |
| C | 0.915494  | 9.019326  | 1.64178   |
| H | 1.283849  | 8.750732  | 0.651088  |
| H | 1.270003  | 10.027175 | 1.880817  |
| H | 1.36639   | 8.342308  | 2.374351  |

 **$\alpha$ -Zingiberene (6)**State: T<sub>1</sub>

Absolute Gibbs Free energy at 278 K: -585.492860 a.u.

|   |           |          |          |
|---|-----------|----------|----------|
| C | -6.515839 | 2.982114 | 0.298546 |
|---|-----------|----------|----------|

|   |           |           |           |
|---|-----------|-----------|-----------|
| C | -5.486889 | 3.503356  | -0.416153 |
| C | -4.841007 | 4.732306  | -0.039084 |
| C | -5.155355 | 5.417841  | 1.251187  |
| C | -6.64624  | 5.158694  | 1.621261  |
| C | -7.008117 | 3.727289  | 1.45789   |
| H | -4.140079 | 5.187768  | -0.727283 |
| H | -5.139939 | 2.987937  | -1.306477 |
| H | -4.561235 | 4.961008  | 2.060486  |
| H | -6.850888 | 5.490356  | 2.6405    |
| H | -7.254212 | 5.786344  | 0.950829  |
| H | -7.604429 | 3.218125  | 2.205379  |
| C | -7.1811   | 1.684527  | -0.043954 |
| H | -8.24591  | 1.835448  | -0.249318 |
| H | -6.720018 | 1.217297  | -0.914826 |
| H | -7.116216 | 0.98648   | 0.797725  |
| C | -4.790723 | 6.91599   | 1.207377  |
| H | -5.227646 | 7.32996   | 0.287542  |
| C | -5.362071 | 7.680703  | 2.405069  |
| H | -4.995691 | 8.70893   | 2.42663   |
| H | -6.452079 | 7.725043  | 2.384796  |
| H | -5.058381 | 7.199045  | 3.340816  |
| C | -3.265927 | 7.097466  | 1.150487  |
| H | -2.808565 | 6.32884   | 0.520316  |
| H | -2.855462 | 6.942347  | 2.15649   |
| C | -2.819103 | 8.472673  | 0.632893  |
| H | -3.287654 | 9.267255  | 1.218722  |
| H | -3.18219  | 8.595672  | -0.392112 |
| C | -1.320376 | 8.624712  | 0.652337  |
| H | -0.797139 | 8.360156  | -0.26428  |
| C | -0.585183 | 9.007622  | 1.698722  |
| C | -1.164752 | 9.371676  | 3.039931  |
| H | -0.914793 | 10.40623  | 3.296664  |
| H | -2.247747 | 9.258749  | 3.082294  |
| H | -0.728887 | 8.73952   | 3.820216  |
| C | 0.914998  | 9.098205  | 1.618466  |
| H | 1.281524  | 8.831665  | 0.626543  |
| H | 1.253203  | 10.113218 | 1.850748  |
| H | 1.382586  | 8.432541  | 2.350994  |

 **$\beta$ -Sesquiphellandrene (7)**State: S<sub>0</sub>

Absolute Gibbs Free energy at 278 K: -585.571446 a.u.

|   |           |          |           |
|---|-----------|----------|-----------|
| C | -6.702565 | 3.077769 | 0.203274  |
| C | -5.511813 | 3.608362 | -0.467904 |
| C | -4.779968 | 4.606716 | 0.038853  |
| C | -5.127255 | 5.351744 | 1.307289  |
| C | -6.602737 | 5.117408 | 1.651905  |
| H | -3.900595 | 4.93298  | -0.508638 |

|   |           |           |           |
|---|-----------|-----------|-----------|
| H | -5.230165 | 3.15637   | -1.414457 |
| H | -4.517759 | 4.943584  | 2.130206  |
| H | -6.825818 | 5.50134   | 2.649257  |
| H | -7.225639 | 5.670974  | 0.938472  |
| C | -7.486148 | 2.163021  | -0.374    |
| H | -8.370366 | 1.7809    | 0.123511  |
| H | -7.259421 | 1.771692  | -1.359756 |
| C | -4.754703 | 6.847024  | 1.175439  |
| H | -5.141454 | 7.19545   | 0.207539  |
| C | -5.388005 | 7.694175  | 2.283037  |
| H | -5.021688 | 8.722237  | 2.247293  |
| H | -6.475314 | 7.732411  | 2.203281  |
| H | -5.133261 | 7.283622  | 3.266047  |
| C | -3.229402 | 7.033137  | 1.190203  |
| H | -2.729044 | 6.21358   | 0.665688  |
| H | -2.879282 | 6.979181  | 2.228866  |
| C | -2.75781  | 8.356618  | 0.570072  |
| H | -3.271133 | 9.197409  | 1.043518  |
| H | -3.053242 | 8.374213  | -0.483397 |
| C | -1.264771 | 8.531071  | 0.672441  |
| H | -0.680246 | 8.197292  | -0.182405 |
| C | -0.603305 | 9.012712  | 1.727229  |
| C | -1.273332 | 9.481909  | 2.99143   |
| H | -1.042078 | 10.535502 | 3.178586  |
| H | -2.356635 | 9.366199  | 2.969218  |
| H | -0.891296 | 8.918652  | 3.848951  |
| C | 0.897998  | 9.1179    | 1.736925  |
| H | 1.331768  | 8.769334  | 0.799044  |
| H | 1.210898  | 10.154524 | 1.898319  |
| H | 1.321937  | 8.527466  | 2.555451  |
| C | -6.954529 | 3.629623  | 1.583248  |
| H | -6.319878 | 3.087046  | 2.295307  |
| H | -7.992256 | 3.45604   | 1.875583  |

### $\beta$ -Sesquiphellandrene (7)

State: T<sub>1</sub>

Absolute Gibbs Free energy at 278 K: -585.483436 a.u.

|   |           |          |           |
|---|-----------|----------|-----------|
| C | -6.501213 | 3.015859 | 0.252151  |
| C | -5.535171 | 3.587226 | -0.501848 |
| C | -4.914032 | 4.852327 | -0.151059 |
| C | -5.221728 | 5.484556 | 1.169072  |
| C | -6.699351 | 5.211384 | 1.502994  |
| H | -4.277707 | 5.352996 | -0.869092 |
| H | -5.195732 | 3.08042  | -1.400762 |
| H | -4.621592 | 4.98238  | 1.951804  |
| H | -6.951506 | 5.619337 | 2.483381  |
| H | -7.3247   | 5.723228 | 0.761296  |
| C | -7.074532 | 1.713476 | -0.076563 |

|   |           |           |           |
|---|-----------|-----------|-----------|
| H | -7.739802 | 1.213707  | 0.614     |
| H | -6.797454 | 1.203997  | -0.989381 |
| C | -4.836761 | 6.977833  | 1.187955  |
| H | -5.271854 | 7.437059  | 0.289264  |
| C | -5.388934 | 7.702578  | 2.418568  |
| H | -4.985748 | 8.714676  | 2.491937  |
| H | -6.476334 | 7.787717  | 2.394166  |
| H | -5.109756 | 7.165571  | 3.331601  |
| C | -3.309766 | 7.136539  | 1.125305  |
| H | -2.871483 | 6.380155  | 0.466763  |
| H | -2.894239 | 6.942197  | 2.122444  |
| C | -2.843906 | 8.519861  | 0.648421  |
| H | -3.294811 | 9.302595  | 1.263568  |
| H | -3.213254 | 8.682107  | -0.368896 |
| C | -1.342745 | 8.646736  | 0.659659  |
| H | -0.831656 | 8.404414  | -0.269868 |
| C | -0.592422 | 8.982236  | 1.711572  |
| C | -1.154421 | 9.310528  | 3.069397  |
| H | -0.883536 | 10.330975 | 3.359196  |
| H | -2.238901 | 9.21565   | 3.117261  |
| H | -0.723865 | 8.64415   | 3.823734  |
| C | 0.908331  | 9.050833  | 1.620891  |
| H | 1.262147  | 8.810283  | 0.617769  |
| H | 1.265179  | 10.05227  | 1.882368  |
| H | 1.370982  | 8.354585  | 2.327668  |
| C | -7.012606 | 3.713978  | 1.488199  |
| H | -6.572116 | 3.232324  | 2.372131  |
| H | -8.093318 | 3.558444  | 1.567862  |

### 5,5-dimethyl-1-vinylbicyclo[2,1,1]hexane (9)

State: S<sub>0</sub>

Absolute Gibbs Free energy at 278 K: -390.354231 a.u.

Absolute total energy (S<sub>0</sub>): -390.556967

Absolute total energy (T<sub>1</sub>): -390.392173

|   |           |           |          |
|---|-----------|-----------|----------|
| C | 8.021728  | 1.876788  | 3.744137 |
| H | 8.979485  | 2.048095  | 4.241631 |
| H | 7.205556  | 2.08363   | 4.429676 |
| C | 9.200679  | 0.562642  | 2.169903 |
| H | 10.049797 | 0.347929  | 2.82255  |
| H | 9.207241  | -0.168465 | 1.360451 |
| C | 9.176737  | 2.042733  | 1.68137  |
| H | 10.019669 | 2.620293  | 2.064931 |
| H | 9.172761  | 2.134244  | 0.594546 |
| C | 7.853193  | 2.482052  | 2.328254 |
| H | 7.532427  | 3.513558  | 2.179428 |
| C | 7.874702  | 0.536131  | 2.967512 |
| C | 6.886656  | 1.296131  | 2.007059 |
| C | 7.558081  | -0.737666 | 3.663146 |

|   |          |           |           |
|---|----------|-----------|-----------|
| H | 8.175387 | -0.959336 | 4.533609  |
| C | 6.625326 | -1.610311 | 3.293514  |
| H | 5.995428 | -1.434291 | 2.428516  |
| H | 6.465889 | -2.532402 | 3.839647  |
| C | 6.757993 | 0.849868  | 0.551766  |
| H | 6.132658 | -0.04386  | 0.477145  |
| H | 6.269482 | 1.637632  | -0.030629 |
| H | 7.709745 | 0.626431  | 0.072575  |
| C | 5.473411 | 1.501381  | 2.557804  |
| H | 4.876168 | 0.595253  | 2.433247  |
| H | 5.440193 | 1.766105  | 3.613051  |
| H | 4.978524 | 2.299402  | 1.995919  |

### Myrcene epoxide (10)

State: S<sub>0</sub>

Absolute Gibbs Free energy at 278 K: -465.564660 a.u.

|   |           |           |           |
|---|-----------|-----------|-----------|
| C | 2.508862  | 3.151441  | -1.840222 |
| H | 1.552888  | 3.398402  | -1.392763 |
| H | 2.852542  | 3.793331  | -2.641823 |
| C | 3.239705  | 2.112309  | -1.434485 |
| H | 4.191399  | 1.917227  | -1.922612 |
| C | 2.882034  | 1.172358  | -0.359074 |
| C | 3.723006  | 0.176877  | -0.057899 |
| H | 3.519085  | -0.557619 | 0.711062  |
| H | 4.655355  | 0.07102   | -0.602319 |
| C | 1.570356  | 1.404169  | 0.351353  |
| H | 1.590782  | 2.408128  | 0.789712  |
| H | 0.769976  | 1.427953  | -0.398969 |
| C | 1.204949  | 0.391754  | 1.435418  |
| H | 0.303871  | 0.746841  | 1.946312  |
| H | 1.996468  | 0.336504  | 2.187344  |
| C | 0.946554  | -0.999815 | 0.892046  |
| H | 0.694355  | -1.038167 | -0.167992 |
| C | 0.471937  | -2.118746 | 1.725669  |
| C | 0.253215  | -1.931746 | 3.206619  |
| H | 0.90084   | -1.154246 | 3.609767  |
| H | -0.787337 | -1.662036 | 3.405227  |
| H | 0.467636  | -2.864991 | 3.733463  |
| C | -0.324456 | -3.23157  | 1.091017  |
| H | -1.396149 | -3.05074  | 1.20368   |
| H | -0.088428 | -3.311897 | 0.029381  |
| H | -0.08629  | -4.18429  | 1.571251  |
| O | 1.829105  | -2.047819 | 1.293118  |

### Myrcene epoxide (10)

State: T<sub>1</sub>

Absolute Gibbs Free energy at 278 K: -465.483303 a.u.

|   |           |           |           |
|---|-----------|-----------|-----------|
| C | 1.760759  | 0.383224  | -1.760754 |
| H | 0.905056  | 1.020641  | -1.580006 |
| H | 1.785263  | -0.150689 | -2.701191 |
| C | 2.786041  | 0.245462  | -0.853096 |
| H | 3.599162  | -0.426843 | -1.11864  |
| C | 2.893059  | 0.869451  | 0.393001  |
| C | 4.029043  | 0.564043  | 1.273639  |
| H | 3.969474  | -0.216855 | 2.024055  |
| H | 4.923244  | 1.177889  | 1.258593  |
| C | 1.869058  | 1.842786  | 0.917824  |
| H | 2.391144  | 2.662157  | 1.421334  |
| H | 1.300575  | 2.286998  | 0.096037  |
| C | 0.899687  | 1.191692  | 1.922817  |
| H | 0.278812  | 1.96727   | 2.381907  |
| H | 1.456957  | 0.714845  | 2.731554  |
| C | -0.005438 | 0.195233  | 1.247862  |
| H | -0.63484  | 0.630521  | 0.469339  |
| C | 0.249395  | -1.251258 | 1.129088  |
| C | 1.464785  | -1.908768 | 1.732987  |
| H | 1.837187  | -1.35548  | 2.59414   |
| H | 1.202362  | -2.915938 | 2.067837  |
| H | 2.259941  | -1.989448 | 0.987423  |
| C | -0.364098 | -2.001312 | -0.027079 |
| H | -0.657439 | -3.005835 | 0.289524  |
| H | -1.250685 | -1.482166 | -0.394036 |
| H | 0.357257  | -2.089584 | -0.842981 |
| O | -0.697764 | -0.737189 | 2.069615  |

### M06-2X/6-31+G(d,p)

#### Dimers

##### Dimer 1a gas-phase

Absolute energy: -783.487522296 a.u.

Absolute Gibbs Free energy at 278 K: -783.008465 a.u.

|   |          |          |          |
|---|----------|----------|----------|
| C | 0.949348 | 3.449393 | 2.641819 |
| C | 2.48112  | 3.467336 | 2.94205  |
| C | 2.475912 | 5.009963 | 2.655526 |
| C | 0.923414 | 4.990612 | 2.7873   |
| H | 0.76668  | 3.156103 | 1.598647 |
| H | 0.622656 | 5.27516  | 3.805274 |
| C | 2.661781 | 3.109693 | 4.423028 |
| H | 2.088041 | 3.814398 | 5.036226 |
| C | 2.798952 | 5.370754 | 1.201446 |
| H | 2.31092  | 4.650283 | 0.53487  |
| C | 2.296011 | 6.782734 | 0.843576 |

|   |           |           |           |
|---|-----------|-----------|-----------|
| H | 2.209417  | 6.850352  | -0.249402 |
| C | 2.163153  | 1.682441  | 4.728672  |
| H | 1.972453  | 1.609633  | 5.80641   |
| C | 0.106671  | 2.585554  | 3.583455  |
| H | -0.858246 | 2.329908  | 3.127733  |
| H | -0.119135 | 3.147955  | 4.49963   |
| C | 0.884265  | 1.312352  | 3.940354  |
| H | 1.199436  | 0.865185  | 2.984228  |
| C | 0.018512  | 0.244766  | 4.638628  |
| H | -0.765122 | -0.033918 | 3.918791  |
| C | -0.685028 | 0.755167  | 5.899413  |
| H | -1.362341 | 1.585595  | 5.680335  |
| H | -1.2775   | -0.045832 | 6.353099  |
| H | 0.03441   | 1.095565  | 6.652564  |
| C | 0.831976  | -1.014246 | 4.949505  |
| H | 0.183476  | -1.81916  | 5.30937   |
| H | 1.359976  | -1.375932 | 4.060237  |
| H | 1.578532  | -0.818849 | 5.727436  |
| C | 3.406851  | 2.613328  | 2.079872  |
| H | 3.202404  | 2.733367  | 1.012538  |
| H | 4.454069  | 2.890769  | 2.256044  |
| H | 3.305272  | 1.548987  | 2.314606  |
| C | 0.155123  | 5.835774  | 1.766939  |
| H | -0.850181 | 6.047688  | 2.141903  |
| H | 0.02864   | 5.277686  | 0.82719   |
| C | 3.278506  | 5.891379  | 3.608018  |
| H | 4.348063  | 5.655692  | 3.536681  |
| H | 3.158247  | 6.952558  | 3.367365  |
| H | 2.972978  | 5.756274  | 4.649072  |
| C | 0.924588  | 7.13208   | 1.475645  |
| H | 1.101077  | 7.624589  | 2.447208  |
| C | 0.147262  | 8.138182  | 0.606334  |
| H | -0.037983 | 7.657091  | -0.367142 |
| C | 0.971547  | 9.407264  | 0.36512   |
| H | 1.91354   | 9.199806  | -0.149118 |
| H | 0.411368  | 10.125371 | -0.241687 |
| H | 1.20853   | 9.891344  | 1.32107   |
| C | -1.203826 | 8.52072   | 1.217958  |
| H | -1.898794 | 7.678733  | 1.259281  |
| H | -1.068067 | 8.899419  | 2.238812  |
| H | -1.6808   | 9.312036  | 0.631092  |
| H | 3.039078  | 7.533111  | 1.134858  |
| H | 3.875896  | 5.290835  | 1.006666  |
| H | 3.710615  | 3.219909  | 4.726351  |
| H | 2.950037  | 0.950968  | 4.512922  |

**Dimer 1a solvent phase (toluene)**

Absolute energy: -783.500802232 a.u.

|   |           |           |           |
|---|-----------|-----------|-----------|
| C | -0.642593 | 0.244253  | -0.581413 |
| C | -0.771505 | -1.237531 | -0.106872 |
| C | 0.731975  | -1.180404 | 0.340586  |
| C | 0.661966  | 0.373414  | 0.24314   |
| H | -0.424983 | 0.283425  | -1.657717 |
| H | 0.449554  | 0.807598  | 1.229952  |
| C | -1.768535 | -1.259762 | 1.058898  |
| H | -1.419462 | -0.578479 | 1.843502  |
| C | 1.717705  | -1.653848 | -0.733498 |
| H | 1.384095  | -1.290015 | -1.712231 |
| C | 3.139285  | -1.118703 | -0.473015 |
| H | 3.700809  | -1.161694 | -1.416227 |
| C | -3.174972 | -0.80851  | 0.614293  |
| H | -3.731774 | -0.495994 | 1.506341  |
| C | -1.83726  | 1.143931  | -0.253661 |
| H | -1.85039  | 2.032506  | -0.897658 |
| H | -1.754554 | 1.506568  | 0.779931  |
| C | -3.137543 | 0.346073  | -0.415475 |
| H | -3.100398 | -0.104835 | -1.419627 |
| C | -4.401995 | 1.229011  | -0.397322 |
| H | -4.318215 | 1.904056  | -1.261613 |
| C | -4.520041 | 2.105717  | 0.85211   |
| H | -3.680598 | 2.801467  | 0.944749  |
| H | -5.43862  | 2.701049  | 0.812414  |
| H | -4.561684 | 1.503664  | 1.767071  |
| C | -5.668796 | 0.391071  | -0.584726 |
| H | -6.545262 | 1.03321   | -0.721524 |
| H | -5.589834 | -0.261829 | -1.461588 |
| H | -5.858332 | -0.242218 | 0.289588  |
| C | -1.141915 | -2.303405 | -1.134061 |
| H | -0.542352 | -2.225304 | -2.045515 |
| H | -0.990145 | -3.307587 | -0.716844 |
| H | -2.193841 | -2.228659 | -1.42946  |
| C | 1.88429   | 1.060642  | -0.373414 |
| H | 1.906421  | 2.113801  | -0.078576 |
| H | 1.818076  | 1.042282  | -1.471532 |
| C | 1.076912  | -1.809089 | 1.686984  |
| H | 0.90591   | -2.893313 | 1.661723  |
| H | 2.129407  | -1.649821 | 1.944593  |
| H | 0.47736   | -1.393825 | 2.502076  |
| C | 3.167271  | 0.336579  | 0.05946   |
| H | 3.16125   | 0.30661   | 1.162271  |
| C | 4.463115  | 1.060183  | -0.35439  |
| H | 4.483939  | 1.094164  | -1.45512  |
| C | 5.698393  | 0.291116  | 0.124377  |
| H | 5.748554  | -0.71887  | -0.291871 |

|   |           |           |           |
|---|-----------|-----------|-----------|
| H | 6.617337  | 0.813165  | -0.161984 |
| H | 5.692406  | 0.204229  | 1.21869   |
| C | 4.526528  | 2.496626  | 0.171826  |
| H | 3.766631  | 3.142261  | -0.275837 |
| H | 4.387869  | 2.514669  | 1.260506  |
| H | 5.502893  | 2.942955  | -0.044678 |
| H | 3.667839  | -1.777661 | 0.22451   |
| H | 1.73185   | -2.749323 | -0.798937 |
| H | -1.815972 | -2.257399 | 1.513893  |
| H | -3.72949  | -1.655041 | 0.193779  |

### Dimer 1c gas-phase

Absolute energy: -783.50809546 a.u.

Absolute Gibbs Free energy at 278 K: -783.025727 a.u.

|   |           |           |           |
|---|-----------|-----------|-----------|
| C | -1.797698 | 1.806779  | -0.752856 |
| C | -0.503511 | 1.025554  | -1.068033 |
| C | -1.618605 | -0.007677 | 1.00429   |
| C | -2.27926  | 1.340716  | 0.646154  |
| H | -2.543576 | 1.509474  | -1.502503 |
| H | -2.025841 | 2.099783  | 1.395322  |
| H | -3.371158 | 1.254205  | 0.663986  |
| C | 0.431807  | 1.14429   | 0.158379  |
| H | 0.295864  | 2.171137  | 0.522329  |
| C | -0.097454 | 0.21371   | 1.291489  |
| H | -2.08039  | -0.431526 | 1.905626  |
| H | -0.013624 | 1.45422   | -1.952722 |
| C | -1.812366 | -0.967814 | -0.193761 |
| H | -1.456655 | -1.962746 | 0.100421  |
| C | -0.928463 | -0.425735 | -1.357434 |
| H | -0.050111 | -1.061223 | -1.515478 |
| H | -1.491132 | -0.436188 | -2.298418 |
| C | 0.666018  | -1.129915 | 1.34773   |
| H | 0.380676  | -1.654668 | 2.269538  |
| H | 0.375584  | -1.783892 | 0.522851  |
| C | 2.186111  | -0.998075 | 1.253386  |
| H | 2.622511  | -1.997375 | 1.343775  |
| H | 2.594579  | -0.399611 | 2.080741  |
| C | 2.582377  | -0.347425 | -0.075948 |
| H | 2.177197  | -0.967963 | -0.893818 |
| C | 1.943665  | 1.045914  | -0.1308   |
| H | 2.477706  | 1.661025  | 0.610572  |
| H | 2.125558  | 1.518757  | -1.102074 |
| C | 4.111048  | -0.27972  | -0.272973 |
| H | 4.52272   | 0.311461  | 0.560371  |
| C | 4.755322  | -1.669768 | -0.235304 |
| H | 5.826667  | -1.602197 | -0.448218 |
| H | 4.644592  | -2.157863 | 0.735664  |

|   |           |           |           |
|---|-----------|-----------|-----------|
| H | 4.305411  | -2.320473 | -0.995669 |
| C | 4.492042  | 0.416433  | -1.584259 |
| H | 4.000719  | -0.073942 | -2.434295 |
| H | 4.211167  | 1.47206   | -1.594862 |
| H | 5.572702  | 0.361984  | -1.748246 |
| C | -1.660449 | 3.324856  | -0.843734 |
| H | -1.367739 | 3.635493  | -1.852116 |
| H | -2.612715 | 3.810287  | -0.604446 |
| H | -0.91326  | 3.709897  | -0.141409 |
| C | -3.285994 | -1.20079  | -0.595166 |
| H | -3.689701 | -0.283916 | -1.046691 |
| C | -4.154247 | -1.56836  | 0.612026  |
| H | -4.239394 | -0.750914 | 1.332854  |
| H | -5.165775 | -1.837293 | 0.29149   |
| H | -3.7295   | -2.434672 | 1.135007  |
| C | -3.381168 | -2.323258 | -1.634476 |
| H | -4.414412 | -2.458525 | -1.9692   |
| H | -2.766934 | -2.12899  | -2.518022 |
| H | -3.045333 | -3.271157 | -1.196272 |
| C | 0.087951  | 0.9022    | 2.652801  |
| H | -0.460208 | 1.846718  | 2.71121   |
| H | -0.261927 | 0.256431  | 3.466361  |
| H | 1.142968  | 1.13071   | 2.837269  |

### Dimer 1c solvent phase (toluene)

Absolute energy: -783.520743914 a.u.

|   |           |           |           |
|---|-----------|-----------|-----------|
| C | -1.797846 | 1.806613  | -0.753557 |
| C | -0.503122 | 1.025345  | -1.068065 |
| C | -1.618858 | -0.007326 | 1.004759  |
| C | -2.278708 | 1.341331  | 0.645883  |
| H | -2.54376  | 1.507757  | -1.502325 |
| H | -2.023611 | 2.100532  | 1.394482  |
| H | -3.370714 | 1.254598  | 0.663991  |
| C | 0.432232  | 1.144471  | 0.158824  |
| H | 0.295499  | 2.171044  | 0.523078  |
| C | -0.097242 | 0.213753  | 1.292202  |
| H | -2.081656 | -0.429984 | 1.906089  |
| H | -0.012517 | 1.453746  | -1.952415 |
| C | -1.812942 | -0.968007 | -0.193223 |
| H | -1.457001 | -1.962974 | 0.100208  |
| C | -0.928493 | -0.426165 | -1.356557 |
| H | -0.049796 | -1.061993 | -1.511985 |
| H | -1.490505 | -0.437653 | -2.298009 |
| C | 0.666778  | -1.12968  | 1.348758  |
| H | 0.382203  | -1.654055 | 2.271239  |
| H | 0.376303  | -1.783675 | 0.523839  |
| C | 2.187021  | -0.997807 | 1.254585  |
| H | 2.623313  | -1.997452 | 1.344671  |

|   |           |           |           |   |           |           |           |
|---|-----------|-----------|-----------|---|-----------|-----------|-----------|
| H | 2.594811  | -0.399145 | 2.082232  | C | -3.47685  | 0.256882  | 0.141965  |
| C | 2.583318  | -0.347334 | -0.074933 | H | -3.270706 | -0.791324 | 0.402692  |
| H | 2.177084  | -0.967732 | -0.892074 | H | -3.744366 | 0.264116  | -0.924237 |
| C | 1.944563  | 1.046154  | -0.12967  | C | -4.651282 | 0.763335  | 0.983602  |
| H | 2.477965  | 1.66127   | 0.612135  | H | -4.273437 | 1.012244  | 1.985341  |
| H | 2.126907  | 1.518881  | -1.10107  | H | -5.028742 | 1.704401  | 0.564961  |
| C | 4.11244   | -0.280564 | -0.27318  | C | -5.912798 | -1.751735 | -0.906365 |
| H | 4.525879  | 0.308554  | 0.560637  | H | -4.997207 | -1.403591 | -1.391942 |
| C | 4.755181  | -1.670892 | -0.239292 | H | -5.651284 | -2.600184 | -0.265343 |
| H | 5.827623  | -1.60404  | -0.449991 | H | -6.582033 | -2.118627 | -1.69185  |
| H | 4.643985  | -2.163074 | 0.730132  | C | -6.93585  | 0.552195  | -0.996087 |
| H | 4.307255  | -2.320637 | -1.002213 | H | -6.032747 | 0.973234  | -1.452989 |
| C | 4.493226  | 0.417007  | -1.583245 | H | -7.605559 | 0.250269  | -1.807498 |
| H | 4.002029  | -0.070146 | -2.435698 | H | -7.428308 | 1.350292  | -0.429796 |
| H | 4.214877  | 1.473827  | -1.592962 | C | 3.311232  | -0.177952 | 0.180051  |
| H | 5.574346  | 0.362368  | -1.748101 | H | 3.103446  | 0.899883  | 0.250699  |
| C | -1.661737 | 3.324215  | -0.845181 | H | 3.584105  | -0.370379 | -0.868474 |
| H | -1.373159 | 3.636076  | -1.855038 | C | 4.489698  | -0.514713 | 1.095217  |
| H | -2.614072 | 3.810138  | -0.604169 | H | 4.816843  | -1.546551 | 0.919812  |
| H | -0.912893 | 3.71236   | -0.145798 | H | 4.150635  | -0.476852 | 2.13936   |
| C | -3.28723  | -1.200519 | -0.594509 | C | 7.45319   | 1.477092  | -0.508988 |
| H | -3.69087  | -0.282682 | -1.043844 | H | 8.264492  | 1.081058  | 0.11378   |
| C | -4.155074 | -1.570579 | 0.61162   | H | 7.842732  | 1.606014  | -1.523769 |
| H | -4.242428 | -0.754761 | 1.334638  | H | 7.184548  | 2.464807  | -0.120353 |
| H | -5.167451 | -1.838421 | 0.290631  | C | 6.650407  | -0.845116 | -1.036897 |
| H | -3.732751 | -2.438619 | 1.134435  | H | 5.788153  | -1.511316 | -1.141416 |
| C | -3.383234 | -2.320737 | -1.635356 | H | 7.120533  | -0.752128 | -2.021049 |
| H | -4.416728 | -2.454368 | -1.971909 | H | 7.370207  | -1.330245 | -0.365598 |
| H | -2.769531 | -2.12586  | -2.519773 | C | -2.381174 | 2.540933  | -0.071479 |
| H | -3.04912  | -3.271421 | -1.200875 | H | -2.738797 | 2.618717  | -1.106074 |
| C | 0.087717  | 0.902477  | 2.652846  | H | -3.106772 | 3.043457  | 0.574289  |
| H | -0.46141  | 1.84688   | 2.712942  | H | -1.436128 | 3.089314  | -0.0006   |
| H | -0.260582 | 0.257247  | 3.468165  | C | 6.254135  | 0.527556  | -0.490082 |
| H | 1.142532  | 1.132878  | 2.838458  | H | 5.480608  | 0.949151  | -1.147194 |

**Dimer 2a (cis) gas-phase**

Absolute energy: -785.87605671 a.u.

Absolute Gibbs Free energy at 278 K: -785.365462 a.u.

|   |           |           |           |   |           |           |           |
|---|-----------|-----------|-----------|---|-----------|-----------|-----------|
| C | 0.890431  | -0.480346 | -0.406606 | H | 2.931173  | -2.851322 | 1.094253  |
| C | -0.55004  | -0.957462 | -0.105301 | H | 1.266662  | -2.990584 | 0.517942  |
| C | -1.05526  | 0.453875  | -0.48821  | C | 2.025534  | -0.951536 | 0.49253   |
| C | 0.385028  | 0.975972  | -0.273383 | H | 1.73551   | -0.724211 | 1.53179   |
| H | 1.142181  | -0.694628 | -1.45533  | C | -6.595654 | -0.640945 | -0.100814 |
| H | -0.940561 | -1.817803 | -0.655709 | H | -7.545109 | -1.059872 | 0.260705  |
| H | -0.680556 | -1.134431 | 0.971702  | C | -5.817224 | -0.217327 | 1.161352  |
| H | -1.30635  | 0.483665  | -1.558344 | H | -6.531786 | 0.249711  | 1.851698  |
| H | 0.515119  | 1.336246  | 0.756929  | H | -5.450091 | -1.121044 | 1.667388  |
| H | 0.775364  | 1.728518  | -0.96395  | C | -2.190714 | 1.073022  | 0.315346  |



H -1.901652 1.028694 1.378601

**Dimer 2a (cis) solvent phase (toluene)**

Absolute energy: -785.891911618 a.u.

C -0.89198 0.473745 -0.398289  
C 0.547388 0.954064 -0.095857  
C 1.056848 -0.455126 -0.48198  
C -0.382052 -0.981384 -0.266167  
H -1.143603 0.688458 -1.446825  
H 0.935245 1.816706 -0.645075  
H 0.677376 1.129131 0.981429  
H 1.306449 -0.482323 -1.552401  
H -0.510296 -1.342685 0.76392  
H -0.770609 -1.734443 -0.957616  
C 3.480827 -0.253619 0.143993  
H 3.273222 0.793696 0.407373  
H 3.746507 -0.258702 -0.922515  
C 4.658785 -0.757735 0.982297  
H 4.284903 -1.004965 1.986074  
H 5.035886 -1.699036 0.563704  
C 5.917031 1.749472 -0.9196  
H 5.009713 1.393324 -1.415665  
H 5.641255 2.597665 -0.283368  
H 6.590567 2.123073 -1.69906  
C 6.949396 -0.548169 -0.997144  
H 6.049472 -0.976779 -1.453981  
H 7.618485 -0.246186 -1.809902  
H 7.447615 -1.342057 -0.429115  
C -3.314952 0.168326 0.184457  
H -3.106804 -0.909548 0.253835  
H -3.586213 0.363075 -0.86396  
C -4.496318 0.501211 1.097487  
H -4.820482 1.535152 0.928653  
H -4.161686 0.453553 2.142818  
C -7.469518 -1.460944 -0.526665  
H -8.280604 -1.066058 0.097812  
H -7.859234 -1.581085 -1.543062  
H -7.208307 -2.454363 -0.146002  
C -6.653467 0.859847 -1.033341  
H -5.787564 1.522372 -1.134955  
H -7.125661 0.778902 -2.018239  
H -7.369602 1.345553 -0.357931  
C 2.389851 -2.539228 -0.070123  
H 2.748293 -2.617577 -1.104772  
H 3.115521 -3.042795 0.57559  
H 1.446609 -3.091869 0.00012  
C -6.264784 -0.519596 -0.499746

H -5.494645 -0.939256 -1.16189

C -5.689971 -0.442616 0.921887  
H -6.495879 -0.131442 1.602475  
H -5.394117 -1.454152 1.2337  
C -2.219637 2.454589 0.375684  
H -2.588684 2.713549 -0.62533  
H -2.93465 2.84135 1.107804  
H -1.272375 2.982738 0.529876  
C -2.029491 0.941951 0.500809  
H -1.740642 0.713115 1.539858  
C 6.602948 0.646363 -0.107013  
H 7.549895 1.071162 0.254081  
C 5.824456 0.224269 1.155781  
H 6.540047 -0.241176 1.846432  
H 5.457224 1.1289 1.660365  
C 2.196054 -1.072741 0.319034  
H 1.908882 -1.031057 1.382711

**Dimer 2a (trans) gas-phase**

Absolute energy: -785.87348024 a.u.

Absolute Gibbs Free energy at 278 K: -785.362101 a.u.

C 0.993785 -1.664094 -0.624285  
C -0.087483 -0.559723 -0.769799  
C -1.068364 -1.439422 0.040098  
C -0.137486 -2.646818 -0.219705  
H 1.52187 -1.922268 -1.551537  
H 0.147341 0.432561 -0.372497  
H -0.421683 -0.449258 -1.808038  
H -1.046316 -1.161253 1.103213  
H -0.488659 -3.241074 -1.071305  
H 0.059493 -3.321855 0.619029  
C -3.202411 -0.161608 -0.303339  
H -2.608171 0.584002 -0.851178  
H -3.18068 0.140555 0.753326  
C -4.640791 -0.142319 -0.827694  
H -4.670384 -0.708495 -1.769368  
H -5.295645 -0.683468 -0.133746  
C -4.119898 2.937229 0.488047  
H -3.381599 2.262563 0.929695  
H -3.657219 3.420549 -0.378843  
H -4.338761 3.714272 1.228157  
C -6.032124 1.50719 1.300307  
H -5.343559 0.772262 1.73325  
H -6.274743 2.232623 2.083201  
H -6.954208 0.982398 1.027282  
C 2.93253 -0.219105 0.094473  
H 2.309298 0.656312 -0.13249

|   |           |           |           |   |           |           |           |
|---|-----------|-----------|-----------|---|-----------|-----------|-----------|
| H | 3.458398  | -0.47084  | -0.838749 | C | -3.207124 | -0.162147 | -0.304064 |
| C | 3.945707  | 0.171192  | 1.172556  | H | -2.614966 | 0.584159  | -0.853315 |
| H | 4.687634  | -0.626163 | 1.298101  | H | -3.186461 | 0.141167  | 0.752152  |
| H | 3.424822  | 0.256016  | 2.135982  | C | -4.645762 | -0.145549 | -0.828266 |
| C | 6.112093  | 2.906755  | -0.601258 | H | -4.674338 | -0.71075  | -1.77071  |
| H | 6.875948  | 3.029894  | 0.176077  | H | -5.299407 | -0.688424 | -0.134436 |
| H | 6.606865  | 2.9955    | -1.573606 | C | -4.137005 | 2.934174  | 0.491695  |
| H | 5.400738  | 3.733551  | -0.505533 | H | -3.403149 | 2.263057  | 0.946889  |
| C | 6.424421  | 0.413079  | -0.592587 | H | -3.664235 | 3.412061  | -0.373407 |
| H | 5.938655  | -0.567823 | -0.603863 | H | -4.361379 | 3.718015  | 1.22383   |
| H | 6.998344  | 0.511049  | -1.519544 | C | -6.050475 | 1.505278  | 1.295691  |
| H | 7.13385   | 0.426979  | 0.244431  | H | -5.364443 | 0.770355  | 1.733347  |
| C | -3.26068  | -2.614815 | 0.356926  | H | -6.296045 | 2.231847  | 2.077507  |
| H | -3.356297 | -2.32897  | 1.412135  | H | -6.973268 | 0.981123  | 1.022026  |
| H | -4.266072 | -2.785912 | -0.038011 | C | 2.934147  | -0.212594 | 0.095426  |
| H | -2.719776 | -3.56583  | 0.314363  | H | 2.310334  | 0.662826  | -0.130069 |
| C | 5.414387  | 1.553572  | -0.453709 | H | 3.459367  | -0.464544 | -0.83803  |
| H | 4.680169  | 1.463239  | -1.266498 | C | 3.94911   | 0.17819   | 1.171808  |
| C | 4.662862  | 1.493338  | 0.883505  | H | 4.687786  | -0.621771 | 1.300632  |
| H | 5.380338  | 1.696748  | 1.691599  | H | 3.428356  | 0.270107  | 2.134836  |
| H | 3.928935  | 2.310987  | 0.908117  | C | 6.136873  | 2.896791  | -0.603185 |
| C | 2.872582  | -2.663076 | 0.72093   | H | 6.900453  | 3.018347  | 0.175246  |
| H | 3.508875  | -2.871045 | -0.148864 | H | 6.634601  | 2.982143  | -1.574968 |
| H | 3.52267   | -2.550591 | 1.592779  | H | 5.430968  | 3.729455  | -0.511613 |
| H | 2.242454  | -3.54054  | 0.890726  | C | 6.434411  | 0.40277   | -0.586971 |
| C | 2.034992  | -1.405707 | 0.469348  | H | 5.9441    | -0.576268 | -0.600069 |
| H | 1.497663  | -1.15033  | 1.398079  | H | 7.013721  | 0.495077  | -1.511876 |
| C | -5.405301 | 2.203247  | 0.09054   | H | 7.141217  | 0.412413  | 0.252827  |
| H | -6.111561 | 2.975364  | -0.24509  | C | -3.260043 | -2.614741 | 0.357173  |
| C | -5.231872 | 1.245468  | -1.105722 | H | -3.35872  | -2.330462 | 1.412894  |
| H | -6.221688 | 1.092393  | -1.555334 | H | -4.26492  | -2.790187 | -0.038548 |
| H | -4.623112 | 1.746379  | -1.87129  | H | -2.718611 | -3.566158 | 0.316057  |
| C | -2.516903 | -1.527752 | -0.421404 | C | 5.430339  | 1.548731  | -0.455645 |
| H | -2.504494 | -1.810267 | -1.48753  | H | 4.69984   | 1.460202  | -1.271845 |

**Dimer 2a (trans) solvent phase (toluene)**

Absolute energy: -785.889248281 a.u.

|   |           |           |           |   |           |           |           |
|---|-----------|-----------|-----------|---|-----------|-----------|-----------|
| C | 0.99461   | -1.659075 | -0.622754 | H | 3.520987  | -2.546477 | 1.597915  |
| C | -0.088348 | -0.556289 | -0.769569 | H | 2.243816  | -3.535087 | 0.890719  |
| C | -1.068997 | -1.436402 | 0.040475  | C | 2.036274  | -1.399391 | 0.471117  |
| C | -0.136108 | -2.64265  | -0.218193 | H | 1.498891  | -1.1442   | 1.39963   |
| H | 1.523557  | -1.917367 | -1.549459 | C | -5.419623 | 2.199833  | 0.087789  |
| H | 0.145436  | 0.436728  | -0.372969 | H | -6.124565 | 2.971423  | -0.251653 |
| H | -0.421947 | -0.447795 | -1.808323 | C | -5.240524 | 1.240745  | -1.10674  |
| H | -1.047698 | -1.157597 | 1.103279  | H | -6.229511 | 1.084057  | -1.55739  |
| H | -0.485924 | -3.237375 | -1.070179 | H | -4.632365 | 1.743199  | -1.87194  |
| H | 0.061899  | -3.31716  | 0.620968  | C | -2.518048 | -1.527243 | -0.421544 |

H -2.505025 -1.810749 -1.487192

**Dimer 2g gas-phase**

Absolute energy: -785.907053508 a.u.

Absolute Gibbs Free energy at 278 K: -785.393889 a.u.

C -0.639313 1.975001 0.147891  
C 0.485912 2.857325 -0.393757  
C 1.849587 2.346318 0.067109  
C 2.067828 0.881647 -0.322937  
C 0.914038 0.010832 0.192778  
C -0.469261 0.50372 -0.259484  
H 2.653763 2.965224 -0.349267  
H 0.450242 2.85638 -1.492194  
H 0.339362 3.894894 -0.073805  
H -0.639295 2.028818 1.247448  
H -1.606435 2.365088 -0.184458  
H 2.062336 0.824132 -1.424714  
H 1.064357 -1.019349 -0.141667  
H 0.946171 -0.004668 1.295815  
H -0.494598 0.44789 -1.362429  
H 1.917814 2.432964 1.162453  
C -1.630962 -0.368167 0.272409  
H -1.783577 -0.095639 1.329682  
C -1.322559 -1.86864 0.210337  
H -0.517222 -2.154312 0.89138  
H -2.201263 -2.460907 0.479515  
H -1.0257 -2.15624 -0.806269  
C -2.935776 -0.075979 -0.48902  
H -2.877332 -0.561335 -1.475006  
H -3.026946 0.998813 -0.685582  
C 3.436278 0.39307 0.167614  
H 4.188701 1.130444 -0.142445  
H 3.439462 0.391153 1.268962  
C 3.84796 -0.986381 -0.347204  
H 3.090882 -1.727589 -0.066013  
H 3.863082 -0.961658 -1.446573  
C 5.209703 -1.481734 0.154297  
H 5.373627 -2.483125 -0.263183  
H 5.172923 -1.610866 1.245775  
C 6.409598 -0.581701 -0.206724  
H 6.136818 0.009826 -1.093805  
C 7.635692 -1.425708 -0.564079  
H 8.49905 -0.795339 -0.80091  
H 7.912156 -2.069061 0.280166  
H 7.437576 -2.070775 -1.425889  
C 6.765853 0.384764 0.927725

H 5.909038 0.983977 1.246498  
H 7.118722 -0.179234 1.799662  
H 7.56618 1.068723 0.626686  
C -4.208906 -0.530826 0.226899  
H -4.242686 -0.0573 1.216553  
H -4.185468 -1.614955 0.401064  
C -5.473057 -0.184642 -0.56051  
H -5.570319 0.909701 -0.629574  
H -5.358462 -0.547796 -1.591512  
C -6.771595 -0.758802 0.018248  
H -6.672231 -1.854226 0.041109  
C -7.027124 -0.273052 1.446571  
H -6.25204 -0.610205 2.1404  
H -7.054021 0.82355 1.476452  
H -7.988989 -0.641068 1.817746  
C -7.955506 -0.405455 -0.883438  
H -7.794998 -0.756101 -1.908055  
H -8.884326 -0.850938 -0.513425  
H -8.096705 0.681582 -0.918951

**Dimer 2g solvent phase (toluene)**

Absolute energy: -785.923269971 a.u.

C -0.650506 1.955789 0.117483  
C 0.470158 2.836392 -0.435999  
C 1.836552 2.34048 0.033674  
C 2.064219 0.870024 -0.329823  
C 0.913766 0.00173 0.198778  
C -0.470552 0.479541 -0.266861  
H 2.636961 2.956712 -0.394287  
H 0.435546 2.81993 -1.53447  
H 0.317606 3.877752 -0.130415  
H -0.651776 2.026581 1.216113  
H -1.620428 2.333844 -0.221758  
H 2.061195 0.793039 -1.430268  
H 1.070655 -1.03358 -0.116727  
H 0.942906 0.006349 1.301894  
H -0.49082 0.406838 -1.368804  
H 1.903843 2.44761 1.127312  
C -1.631673 -0.388394 0.272918  
H -1.794145 -0.095758 1.323199  
C -1.317102 -1.888165 0.243496  
H -0.522969 -2.161028 0.943593  
H -2.199529 -2.47826 0.508805  
H -1.003102 -2.196109 -0.762112  
C -2.933432 -0.120897 -0.504669  
H -2.887533 -0.673408 -1.455364  
H -3.005295 0.939877 -0.773394  
C 3.435177 0.398224 0.171792

|   |           |           |           |   |           |           |           |
|---|-----------|-----------|-----------|---|-----------|-----------|-----------|
| H | 4.184248  | 1.132221  | -0.154027 | H | 2.487977  | 2.122354  | 0.945842  |
| H | 3.437887  | 0.419647  | 1.272901  | H | 0.81838   | 1.081302  | 2.229553  |
| C | 3.85374   | -0.990288 | -0.312612 | H | -1.804747 | 2.948733  | -1.204832 |
| H | 3.103923  | -1.729852 | -0.007982 | H | -2.081151 | -0.638503 | 1.065408  |
| H | 3.861839  | -0.992274 | -1.412444 | H | 1.946397  | -0.177409 | 1.824125  |
| C | 5.222363  | -1.464713 | 0.19098   | H | 0.017405  | -1.29853  | 1.474408  |
| H | 5.387524  | -2.476208 | -0.201375 | H | 0.234033  | -0.723796 | -0.159544 |
| H | 5.195171  | -1.564679 | 1.285932  | C | -0.195985 | 2.904854  | 0.236839  |
| C | 6.415521  | -0.569623 | -0.204439 | H | -0.102347 | 2.706619  | 1.309929  |
| H | 6.13116   | 0.000375  | -1.101713 | H | -0.086161 | 3.989501  | 0.131699  |
| C | 7.640316  | -1.417636 | -0.554729 | C | 0.928847  | 2.179699  | -0.525105 |
| H | 8.500433  | -0.790614 | -0.813892 | H | 0.498267  | 1.483268  | -1.25647  |
| H | 7.928133  | -2.043236 | 0.29954   | H | 1.511735  | 2.896202  | -1.115211 |
| H | 7.437221  | -2.08142  | -1.401718 | C | 2.883641  | 0.60588   | -0.514026 |
| C | 6.781085  | 0.423979  | 0.902481  | H | 3.163122  | 1.228477  | -1.375443 |
| H | 5.925407  | 1.026145  | 1.220442  | H | 2.370414  | -0.273136 | -0.932606 |
| H | 7.150924  | -0.115832 | 1.783148  | C | -3.404583 | 0.799357  | -0.503357 |
| H | 7.572081  | 1.10751   | 0.574881  | H | -3.787117 | 1.5803    | -1.175179 |
| C | -4.209892 | -0.504503 | 0.246378  | H | -3.917484 | 0.950981  | 0.456865  |
| H | -4.248259 | 0.066995  | 1.182685  | C | 4.164627  | 0.157875  | 0.190644  |
| H | -4.182189 | -1.565633 | 0.529575  | H | 3.915913  | -0.448382 | 1.069372  |
| C | -5.472555 | -0.243566 | -0.575522 | H | 4.697413  | 1.044151  | 0.565301  |
| H | -5.564487 | 0.83657   | -0.767532 | C | 5.090235  | -0.635532 | -0.732037 |
| H | -5.35989  | -0.722215 | -1.558514 | H | 4.599157  | -1.579571 | -1.013875 |
| C | -6.775135 | -0.741848 | 0.062934  | H | 5.229059  | -0.072029 | -1.665446 |
| H | -6.682702 | -1.828108 | 0.209889  | C | 6.469881  | -0.954684 | -0.144131 |
| C | -7.030576 | -0.096276 | 1.426061  | H | 6.96072   | 0.000245  | 0.095667  |
| H | -6.263084 | -0.361783 | 2.159078  | C | 7.328837  | -1.687249 | -1.176186 |
| H | -7.046467 | 0.997526  | 1.335237  | H | 8.335861  | -1.878448 | -0.792154 |
| H | -7.997937 | -0.411103 | 1.832046  | H | 6.87818   | -2.654415 | -1.429863 |
| C | -7.955703 | -0.485678 | -0.874516 | H | 7.421897  | -1.108317 | -2.100709 |
| H | -7.797334 | -0.950348 | -1.853687 | C | 6.369604  | -1.775729 | 1.143271  |
| H | -8.888041 | -0.882759 | -0.459329 | H | 5.859461  | -1.228849 | 1.941119  |
| H | -8.093306 | 0.591183  | -1.033285 | H | 5.813841  | -2.704086 | 0.96035   |

### Dimer 2k gas-phase

Absolute energy: -785.891386784 a.u.

Absolute Gibbs Free energy at 278 K: -785.374863 a.u.

|   |           |           |           |   |           |           |           |
|---|-----------|-----------|-----------|---|-----------|-----------|-----------|
| C | -1.605386 | 2.513473  | -0.216104 | H | -3.294902 | -1.371381 | -0.535649 |
| C | -1.895408 | 1.004924  | -0.29643  | H | -3.346809 | -0.608244 | -2.109846 |
| C | 1.900225  | 1.393075  | 0.366047  | C | -5.290593 | -0.822445 | -1.168469 |
| C | -1.396896 | 0.206758  | 0.925919  | H | -5.536494 | -1.329891 | -2.109202 |
| C | 1.188218  | 0.482972  | 1.388199  | H | -5.826814 | 0.138649  | -1.192923 |
| C | 0.028828  | -0.387102 | 0.866545  | C | -5.853031 | -1.671256 | -0.019753 |
| H | -2.33458  | 2.966895  | 0.470735  | H | -5.351726 | -2.649892 | -0.060172 |
| H | -1.393855 | 0.596735  | -1.186799 | C | -5.579779 | -1.059927 | 1.355497  |
| H | -1.504625 | 0.821419  | 1.832263  | H | -4.508068 | -0.966369 | 1.557341  |
|   |           |           |           | H | -6.02545  | -0.059862 | 1.426936  |
|   |           |           |           | H | -6.014591 | -1.678019 | 2.147684  |
|   |           |           |           | C | -7.353408 | -1.896467 | -0.212187 |
|   |           |           |           | H | -7.566925 | -2.353745 | -1.183741 |

|   |           |           |          |
|---|-----------|-----------|----------|
| H | -7.760791 | -2.548443 | 0.567032 |
| H | -7.891642 | -0.942076 | -0.16496 |

**Dimer 2k solvent phase (toluene)**

Absolute energy: -785.907789713 a.u.

|   |           |           |           |
|---|-----------|-----------|-----------|
| C | -1.602648 | 2.507774  | -0.217187 |
| C | -1.897527 | 0.9998    | -0.295347 |
| C | 1.904167  | 1.382043  | 0.359403  |
| C | -1.395237 | 0.201162  | 0.925406  |
| C | 1.193284  | 0.469591  | 1.3808    |
| C | 0.029232  | -0.395437 | 0.861243  |
| H | -2.328924 | 2.964912  | 0.470535  |
| H | -1.400056 | 0.590029  | -1.187009 |
| H | -1.498073 | 0.816073  | 1.832202  |
| H | 2.491007  | 2.111825  | 0.939339  |
| H | 0.828636  | 1.065372  | 2.226407  |
| H | -1.801101 | 2.942934  | -1.206314 |
| H | -2.080215 | -0.643351 | 1.066413  |
| H | 1.951718  | -0.195828 | 1.809216  |
| H | 0.016941  | -1.307195 | 1.469035  |
| H | 0.230844  | -0.731577 | -0.165793 |
| C | -0.191498 | 2.894141  | 0.234199  |
| H | -0.097688 | 2.692889  | 1.306788  |
| H | -0.078609 | 3.978903  | 0.130439  |
| C | 0.930481  | 2.167454  | -0.530346 |
| H | 0.497083  | 1.469353  | -1.258544 |
| H | 1.511601  | 2.883353  | -1.123226 |
| C | 2.888824  | 0.595194  | -0.520448 |
| H | 3.157825  | 1.211452  | -1.389816 |
| H | 2.380172  | -0.292841 | -0.925499 |
| C | -3.40848  | 0.797957  | -0.496142 |
| H | -3.790792 | 1.579247  | -1.167906 |
| H | -3.917129 | 0.951471  | 0.466161  |
| C | 4.17819   | 0.166168  | 0.181379  |
| H | 3.9392    | -0.420598 | 1.076069  |
| H | 4.711549  | 1.062672  | 0.530118  |
| C | 5.097958  | -0.645465 | -0.731519 |
| H | 4.608616  | -1.598709 | -0.98395  |
| H | 5.224475  | -0.10442  | -1.679966 |
| C | 6.486036  | -0.94389  | -0.151448 |
| H | 6.977756  | 0.018466  | 0.053886  |
| C | 7.333586  | -1.705112 | -1.171407 |
| H | 8.34765   | -1.879497 | -0.796428 |
| H | 6.885818  | -2.682698 | -1.389499 |
| H | 7.412676  | -1.155574 | -2.11563  |
| C | 6.404193  | -1.726799 | 1.160211  |
| H | 5.906925  | -1.156894 | 1.950705  |

|   |           |           |           |
|---|-----------|-----------|-----------|
| H | 5.845853  | -2.66071  | 1.015138  |
| H | 7.404284  | -1.989437 | 1.521482  |
| C | -3.787079 | -0.561412 | -1.091448 |
| H | -3.312878 | -1.373131 | -0.521772 |
| H | -3.356713 | -0.613645 | -2.099207 |
| C | -5.303507 | -0.814386 | -1.162939 |
| H | -5.548605 | -1.319488 | -2.105323 |
| H | -5.834563 | 0.149607  | -1.187803 |
| C | -5.87557  | -1.662169 | -0.017917 |
| H | -5.379172 | -2.643229 | -0.05695  |
| C | -5.606247 | -1.05401  | 1.35891   |
| H | -4.534921 | -0.963592 | 1.566091  |
| H | -6.050402 | -0.053265 | 1.433772  |
| H | -6.044368 | -1.673613 | 2.148961  |
| C | -7.375743 | -1.879238 | -0.217095 |
| H | -7.588632 | -2.334578 | -1.190321 |
| H | -7.790414 | -2.531718 | 0.558649  |
| H | -7.911868 | -0.923183 | -0.170306 |

**Dimer 3h gas-phase**

Absolute energy: -785.904851578 a.u.

Absolute Gibbs Free energy at 278 K: -785.387942 a.u.

|   |           |           |           |
|---|-----------|-----------|-----------|
| C | 0.092528  | -0.323816 | 0.352162  |
| C | -1.18855  | 0.473699  | -0.055884 |
| C | -1.156036 | 1.948801  | 0.39703   |
| C | 0.111934  | 2.644338  | -0.099382 |
| C | 1.382778  | 1.901402  | 0.2971    |
| C | 1.348086  | 0.442296  | -0.168009 |
| H | -1.190649 | 0.487453  | -1.161078 |
| H | 0.063886  | 2.711089  | -1.197262 |
| H | 0.138269  | 3.675112  | 0.274952  |
| H | 2.248858  | 2.405333  | -0.144981 |
| H | 1.524759  | 1.945593  | 1.386114  |
| H | 1.24456   | 0.46662   | -1.26695  |
| H | -1.147807 | 1.963045  | 1.49811   |
| C | -2.385254 | 2.734797  | -0.066188 |
| H | -3.317705 | 2.338679  | 0.346573  |
| H | -2.303855 | 3.782018  | 0.243117  |
| H | -2.463883 | 2.715488  | -1.16025  |
| C | -2.491525 | -0.221805 | 0.407345  |
| H | -2.905932 | 0.328033  | 1.261802  |
| H | -2.279713 | -1.229884 | 0.785275  |
| C | -3.541503 | -0.358257 | -0.698537 |
| H | -3.750658 | 0.622667  | -1.148184 |
| H | -3.110682 | -0.971259 | -1.503604 |
| C | -4.866826 | -0.986366 | -0.252031 |
| H | -4.638617 | -1.937805 | 0.251455  |

|   |           |           |           |   |           |           |           |
|---|-----------|-----------|-----------|---|-----------|-----------|-----------|
| C | -5.747061 | -1.286945 | -1.466653 | H | 1.526008  | 1.951718  | 1.38065   |
| H | -6.689719 | -1.756835 | -1.168703 | H | 1.246918  | 0.465374  | -1.26864  |
| H | -5.989465 | -0.359688 | -1.999995 | H | -1.144181 | 1.97385   | 1.493405  |
| H | -5.24123  | -1.955753 | -2.170278 | C | -2.380813 | 2.744302  | -0.07177  |
| C | -5.619911 | -0.089153 | 0.733617  | H | -3.314557 | 2.351471  | 0.342059  |
| H | -5.050989 | 0.089966  | 1.650178  | H | -2.298693 | 3.792145  | 0.237528  |
| H | -5.833381 | 0.883373  | 0.272322  | H | -2.461438 | 2.726506  | -1.165945 |
| H | -6.57597  | -0.538996 | 1.019796  | C | -2.492302 | -0.212783 | 0.408167  |
| C | 0.146677  | -0.476909 | 1.882861  | H | -2.906514 | 0.339389  | 1.261223  |
| H | -0.757949 | -0.954341 | 2.270659  | H | -2.27932  | -1.219917 | 0.787722  |
| H | 0.994807  | -1.088783 | 2.199402  | C | -3.543759 | -0.353418 | -0.69616  |
| H | 0.240478  | 0.492012  | 2.379698  | H | -3.760173 | 0.627047  | -1.143452 |
| C | 0.027798  | -1.712517 | -0.365669 | H | -3.110651 | -0.96343  | -1.502258 |
| H | -0.993914 | -1.890292 | -0.718301 | C | -4.864677 | -0.991329 | -0.248428 |
| H | 0.635349  | -1.652435 | -1.278031 | H | -4.6289   | -1.938703 | 0.259076  |
| C | 0.452667  | -2.949186 | 0.431312  | C | -5.741112 | -1.304336 | -1.462077 |
| H | 0.393362  | -3.839053 | -0.202466 | H | -6.681481 | -1.779623 | -1.163286 |
| H | 1.477903  | -2.877247 | 0.806079  | H | -5.990424 | -0.382765 | -2.00289  |
| H | -0.201139 | -3.114374 | 1.293298  | H | -5.231135 | -1.975005 | -2.161759 |
| C | 2.670759  | -0.275227 | 0.13885   | C | -5.627555 | -0.097834 | 0.732247  |
| H | 2.605988  | -1.316386 | -0.203112 | H | -5.058718 | 0.098828  | 1.64584   |
| H | 2.822902  | -0.31149  | 1.225177  | H | -5.861479 | 0.867427  | 0.265077  |
| C | 3.895817  | 0.363357  | -0.524042 | H | -6.574931 | -0.56124  | 1.027876  |
| H | 3.638331  | 0.651109  | -1.553972 | C | 0.147502  | -0.469542 | 1.882045  |
| H | 4.17162   | 1.291028  | -0.003351 | H | -0.75791  | -0.943223 | 2.273507  |
| C | 5.128438  | -0.548265 | -0.562541 | H | 0.993888  | -1.084094 | 2.199452  |
| H | 4.860348  | -1.449937 | -1.133201 | H | 0.24615   | 0.499428  | 2.378792  |
| C | 6.284157  | 0.147497  | -1.282798 | C | 0.024265  | -1.708061 | -0.364147 |
| H | 7.155468  | -0.510045 | -1.364048 | H | -0.997001 | -1.88143  | -0.720637 |
| H | 5.996115  | 0.45634   | -2.292886 | H | 0.637114  | -1.652983 | -1.273365 |
| H | 6.592396  | 1.044696  | -0.732508 | C | 0.438471  | -2.946231 | 0.434775  |
| C | 5.557884  | -0.982586 | 0.840478  | H | 0.377252  | -3.835733 | -0.200634 |
| H | 5.764288  | -0.103626 | 1.464184  | H | 1.46272   | -2.882633 | 0.814494  |
| H | 4.786406  | -1.575872 | 1.339938  | H | -0.220566 | -3.111168 | 1.293337  |
| H | 6.470026  | -1.586497 | 0.800892  | C | 2.671415  | -0.272909 | 0.141858  |

**Dimer 3h solvent phase (toluene)**

Absolute energy: -785.918646832 a.u.

|   |           |           |           |   |          |           |           |
|---|-----------|-----------|-----------|---|----------|-----------|-----------|
| C | 0.092129  | -0.318198 | 0.35179   | H | 2.601756 | -1.318151 | -0.18631  |
| C | -1.188559 | 0.480949  | -0.057181 | H | 2.826803 | -0.295404 | 1.228138  |
| C | -1.153263 | 1.957345  | 0.392449  | C | 3.897159 | 0.352387  | -0.53303  |
| C | 0.115673  | 2.649577  | -0.106448 | H | 3.639759 | 0.620958  | -1.568152 |
| C | 1.385301  | 1.905475  | 0.2915    | H | 4.174217 | 1.288969  | -0.029277 |
| C | 1.349558  | 0.445077  | -0.16976  | C | 5.129814 | -0.560645 | -0.556014 |
| H | -1.190737 | 0.492337  | -1.162252 | H | 4.862301 | -1.471693 | -1.111685 |
| H | 0.067359  | 2.71432   | -1.204515 | C | 6.285844 | 0.122968  | -1.286423 |
| H | 0.144188  | 3.681051  | 0.266448  | H | 7.156837 | -0.536908 | -1.359455 |
| H | 2.252182  | 2.407639  | -0.151524 | H | 5.999108 | 0.417141  | -2.301851 |
|   |           |           |           | H | 6.597345 | 1.028358  | -0.75078  |
|   |           |           |           | C | 5.559616 | -0.971422 | 0.853484  |
|   |           |           |           | H | 5.762461 | -0.083455 | 1.466146  |
|   |           |           |           | H | 4.79155  | -1.56197  | 1.362297  |

H 6.474648 -1.572662 0.824338

**Dimer 3k gas-phase**

Absolute energy: -785.890272275 a.u.

Absolute Gibbs Free energy at 278 K: -785.373102 a.u.

|   |           |           |           |
|---|-----------|-----------|-----------|
| C | -1.561928 | -1.965765 | -0.695127 |
| C | -2.141569 | -0.871592 | 0.252823  |
| C | 1.675283  | -0.379392 | -0.258691 |
| C | -1.10656  | 0.072078  | 0.879439  |
| C | 1.445315  | -0.27308  | 1.26882   |
| C | 0.008486  | -0.63161  | 1.672958  |
| H | -2.337931 | -2.102675 | -1.461695 |
| H | -2.649379 | -1.39421  | 1.079924  |
| H | -0.681876 | 0.696889  | 0.083239  |
| H | 1.152978  | 0.466265  | -0.728272 |
| H | 1.621018  | 0.776027  | 1.54968   |
| H | -1.630315 | 0.766259  | 1.543542  |
| H | -0.105814 | -0.41665  | 2.74198   |
| H | -0.10349  | -1.716488 | 1.586373  |
| C | -0.306958 | -1.58229  | -1.513702 |
| H | -0.445212 | -0.576997 | -1.936439 |
| H | -0.309587 | -2.261012 | -2.37558  |
| C | 1.103882  | -1.671291 | -0.885166 |
| H | 1.149757  | -2.499969 | -0.166656 |
| H | 1.782995  | -1.963262 | -1.694817 |
| C | 3.156568  | -0.206875 | -0.633153 |
| H | 3.236883  | -0.246897 | -1.728848 |
| H | 3.72996   | -1.063796 | -0.256182 |
| C | -3.216913 | -0.072596 | -0.506525 |
| H | -3.961546 | -0.786902 | -0.878417 |
| H | -2.756462 | 0.381416  | -1.398316 |
| C | 3.776137  | 1.106702  | -0.154433 |
| H | 3.847856  | 1.120934  | 0.942776  |
| H | 3.102432  | 1.932472  | -0.426687 |
| C | 5.168096  | 1.395996  | -0.729461 |
| H | 5.083071  | 1.413772  | -1.826123 |
| C | -3.92339  | 1.018499  | 0.299029  |
| H | -3.215302 | 1.824771  | 0.52544   |
| H | -4.247371 | 0.608753  | 1.269278  |
| C | 2.410992  | -1.146711 | 2.077224  |
| H | 2.342143  | -2.196621 | 1.767168  |
| H | 3.453702  | -0.835303 | 1.969112  |
| H | 2.160373  | -1.102815 | 3.142022  |
| C | -1.423686 | -3.348732 | -0.043953 |
| H | -2.384047 | -3.668958 | 0.372674  |
| H | -1.11855  | -4.09138  | -0.790068 |
| H | -0.690777 | -3.380897 | 0.765989  |
| C | -5.606082 | 2.885913  | 0.343648  |

H -4.807767 3.631958 0.409032

H -6.465496 3.34985 -0.150728

H -5.908136 2.627046 1.365875

C -6.300138 0.643891 -0.5343

H -6.030674 -0.240428 -1.117797

H -6.622886 0.307958 0.458891

H -7.160077 1.112687 -1.023206

C -5.140963 1.635042 -0.404713

H -4.82846 1.935782 -1.415897

C 5.659553 2.768012 -0.265455

H 5.771543 2.784253 0.825465

H 6.632166 3.011626 -0.704549

H 4.954336 3.558539 -0.541692

C 6.177277 0.311566 -0.345323

H 6.227348 0.209039 0.74634

H 5.912083 -0.663458 -0.763356

H 7.180102 0.565831 -0.703113

**Dimer 3k solvent phase (toluene)**

Absolute energy: -785.905034169 a.u.

|   |           |           |           |
|---|-----------|-----------|-----------|
| C | 1.560968  | 1.960384  | -0.694979 |
| C | 2.141579  | 0.865156  | 0.252428  |
| C | -1.681121 | 0.377687  | -0.25475  |
| C | 1.104599  | -0.080898 | 0.872425  |
| C | -1.44685  | 0.265081  | 1.272079  |
| C | -0.007846 | 0.621035  | 1.671479  |
| H | 2.334634  | 2.0969    | -1.46379  |
| H | 2.644572  | 1.387482  | 1.082578  |
| H | 0.677797  | -0.69755  | 0.071105  |
| H | -1.161445 | -0.466987 | -0.728444 |
| H | -1.624504 | -0.784307 | 1.550395  |
| H | 1.625818  | -0.781469 | 1.531988  |
| H | 0.110866  | 0.403411  | 2.739683  |
| H | 0.103121  | 1.706168  | 1.585605  |
| C | 0.302289  | 1.5797    | -1.509647 |
| H | 0.43731   | 0.574393  | -1.933415 |
| H | 0.3035    | 2.25984   | -2.370579 |
| C | -1.106614 | 1.670829  | -0.876682 |
| H | -1.146451 | 2.495728  | -0.153329 |
| H | -1.786638 | 1.968779  | -1.683598 |
| C | -3.163964 | 0.210533  | -0.627337 |
| H | -3.245178 | 0.25771   | -1.722732 |
| H | -3.735419 | 1.065793  | -0.243492 |
| C | 3.222266  | 0.070835  | -0.505153 |
| H | 3.962472  | 0.78943   | -0.87777  |
| H | 2.764358  | -0.387809 | -1.395958 |
| C | -3.786181 | -1.105029 | -0.156659 |

|   |           |           |           |   |           |           |           |
|---|-----------|-----------|-----------|---|-----------|-----------|-----------|
| H | -3.8581   | -1.12534  | 0.940397  | H | 6.489104  | -3.336659 | -0.141145 |
| H | -3.114321 | -1.930435 | -0.434639 | H | 5.944442  | -2.596476 | 1.37187   |
| C | -5.178713 | -1.38981  | -0.734092 | C | 6.304012  | -0.636331 | -0.558697 |
| H | -5.092899 | -1.405385 | -1.830633 | H | 6.026961  | 0.235509  | -1.158094 |
| C | 3.937015  | -1.014091 | 0.301958  | H | 6.631486  | -0.278371 | 0.425678  |
| H | 3.233397  | -1.821711 | 0.537413  | H | 7.165076  | -1.108117 | -1.044095 |
| H | 4.266391  | -0.597506 | 1.26744   | C | 5.152483  | -1.632154 | -0.405185 |
| C | -2.40739  | 1.137743  | 2.086627  | H | 4.833322  | -1.948939 | -1.409282 |
| H | -2.338746 | 2.18952   | 1.781823  | C | -5.673695 | -2.761235 | -0.27351  |
| H | -3.451738 | 0.828944  | 1.983147  | H | -5.790515 | -2.780924 | 0.817248  |
| H | -2.153898 | 1.089244  | 3.151211  | H | -6.64527  | -3.004052 | -0.716757 |
| C | 1.426228  | 3.3421    | -0.041669 | H | -4.969567 | -3.553859 | -0.548732 |
| H | 2.390155  | 3.664945  | 0.366134  | C | -6.1868   | -0.305364 | -0.348967 |
| H | 1.113803  | 4.086402  | -0.783928 | H | -6.240211 | -0.202852 | 0.742844  |
| H | 0.70091   | 3.373426  | 0.775598  | H | -5.921955 | 0.67085   | -0.76574  |
| C | 5.632375  | -2.869191 | 0.355826  | H | -7.190048 | -0.557554 | -0.708949 |
| H | 4.839581  | -3.620046 | 0.439972  |   |           |           |           |



## References

- [S1] A. Rana, L. C. Gomes, J. S. Rodrigues, D. M. M. Yacout, H. Arrou-Vignod, J. Sjölander, N. P. Vedin, O. E. Bakouri, K. Stensjö, P. Lindblad, L. Andersson, C. Sundberg, M. Berglund, P. Lindberg and H. Ottosson, A combined photobiological–photochemical route to C10 cycloalkane jet fuels from carbon dioxide via isoprene, *ChemRxiv*, 2022 DOI: 10.26434/chemrxiv-2022-wh442-v3
- [S2] M. J. Frisch, G. W. Trucks, H. B. Schlegel, G. E. Scuseria, M. A. Robb, J. R. Cheeseman, G. Scalmani, V. Barone, B. Mennucci, G. A. Petersson, H. Nakatsuji, M. Caricato, X. Li, H. P. Hratchian, I A. F. zmaylov, J. Bloino, G. Zheng, J. L. Sonnenberg, M. Hada, M. Ehara, K. Toyota, R. Fukuda, J. Hasegawa, M. Ishida, T. Nakajima, Y. Honda, O. Kitao, H. Nakai, T. Vreven, J. A., Jr. Montgomery, J. E. Peralta, F. Ogliaro, M. Bearpark, J. J. Heyd, E. Brothers, K. N. Kudin, V. N. Staroverov, R. Kobayashi, J. Normand, K. Raghavachari, A. Rendell, J. C. Burant, S. S. Iyengar, J. Tomasi, M. Cossi, N. Rega, J. M. Millam, M. Klene, J. E. Knox, J. B. Cross, V. Bakken, C. Adamo, J. Jaramillo, R. Gomperts, R. E. Stratmann, O. Yazyev, A. J. Austin, R. Cammi, C. Pomelli, J. W. Ochterski, R. L. Martin, K. Morokuma, V. G. Zakrzewski, G. A. Voth, P. Salvador, J. J. Dannenberg, S. Dapprich, A. D. Daniels, Ö. Farkas, J. B. Foresman, J. V. Ortiz, J. Cioslowski and D. J. Fox, *Gaussian 16*, 2016.
- [S3] Y. Zhao and D. G. Truhlar, *Theor. Chem. Acc.* 2008, **120**, 215–241.
- [S4] E. Pahima, S. Hoz, M. Ben-Tzion and D. T. Major, *Sustain. Energy Fuels*, 2019, **3**, 457–466.
